# Supplementary material for: Constitutively active receptor ADGRA3 signaling induces adipose thermogenesis
Source: eLife journal article supplement (doi:10.7554/elife.100205), 2024-08-12
Supplement: fig1-data1 [file elife-100205-fig1-data1-v1.zip]

## Sheet: Sheet1
515 Very high genes in subcutaneous adipocytes	462 Very high genes in visceral adipocytes	27 BAT-elevated GPCRs
AACS	AACS	TACR2
ABCD1	ABCC11	LGR6
ABCD2	ABCC6	OLFR1396
ABHD15	ABCD1	GALR1
ABHD5	ABCD2	OLFR287
ACAA2	ABHD15	OLFR466
ACACA	ACAA2	S1PR5
ACACB	ACACA	OLFR975
ACADS	ACACB	LPAR4
ACAT1	ACADL	OLFR393
ACO1	ACADS	GABBR2
ACO2	ACAT1	OLFR102
ACOT1	ACO1	ACKR3
ACOT2	ACO2	OLFR558
ACOT4	ACOT1	OLFR1385
ACOX1	ACOT2	OLFR90
ACSL1	ACOT4	CRHR2
ACSM5	ACOX1	OLFR667
ACSS2	ACSF2	P2RY1
ACSS3	ACSL1	FZD6
ACVR1C	ACSM5	GPR3
ACYP2	ACSS2	ADGRL4
ADCY5	ACSS3	ADRA1A
ADGRA3	ACVR1C	ADGRF5
ADH1B	ACY1	EDNRB
ADIPOQ	ADCY5	ADRB1
ADIPOR2	ADHFE1	ADGRA3
ADORA1	ADIPOQ
ADRA1A	ADIPOR2
AGPAT2	ADRA2A
AGPAT3	ADRB1
AIFM2	AGPAT2
AKR1C2	AGXT
AKT2	AIFM1
AL139353.1	AIFM2
AL845331.1	AKR1C1
ALDH1L1	AKR1C2
ALDH2	AL139353.1
ALDH4A1	AL845331.1
ALDH6A1	ALDH1L1
ANKEF1	ALDH2
ANKRD53	ALDH4A1
ANXA6	ALDH6A1
AOC3	ALDOC
AP3S2	ANKEF1
APCDD1	ANKRD53
APMAP	ANXA6
APOB	AOC2
APOL6	AOC3
AQP7	APCDD1
AR	APMAP
ARSD	APOL6
ASPH	AQP11
ASS1	AQP7
ATP1A2	ASPH
ATP5F1B	ASS1
ATP5MC3	ATP1A2
ATP5MD	ATP5MC3
ATP5PF	ATP5PF
ATP9A	ATP6V0E2
ATPAF1	ATP9A
AZGP1	ATPAF1
BAG4	AURKAIP1
BAG5	AZGP1
BANK1	BANK1
BCAP31	BCAP31
BCKDHB	BCKDHB
BCL2	BDH1
BCL2L13	BHMT2
BCL7B	BLCAP
BDH1	BOK
BHMT2	BPHL
BLCAP	BTBD6
BNIP3	BTD
BNIP3L	C10orf90
BOK	C14orf180
BTBD6	C19orf12
BTD	C20orf27
C14orf180	C2CD2
C19orf12	C4orf19
C20orf27	C9orf24
C2CD2	CABLES1
C4orf19	CAMK1
CABLES1	CAT
CALB2	CCDC107
CAT	CCDC158
CCDC107	CCDC69
CCDC69	CD151
CCNB3	CD99L2
CD151	CDH20
CD99L2	CDKN2B
CDC42EP2	CDKN2C
CDC42EP4	CDO1
CDH20	CEBPA
CDH23	CES1
CDKN1C	CHCHD10
CDKN2B	CIDEA
CDO1	CIDEC
CEBPA	CISD3
CES1	CKB
CES2	CLCNKA
CHCHD10	CLDN2
CHKA	CLMP
CHP1	CLUH
CIDEA	CNTFR
CIDEC	CNTN3
CLMP	COQ8A
CLUH	COX14
CNTFR	COX5A
COA8	COX7A1
COQ8A	CPN2
COX14	CRAT
COX5A	CS
CPM	CSPG4
CRLS1	CSPG5
CRYAB	CTIF
CS	CYB5A
CSAD	CYC1
CSPG4	DBI
CSPG5	DCXR
CTIF	DDT
CYB5A	DEFB132
DCXR	DGAT1
DDR1	DGAT2
DDT	DGCR6
DEFB132	DHDDS
DGAT1	DHFR
DGAT2	DHRS11
DHCR7	DHTKD1
DHDDS	DLD
DHFR	DMAC2L
DHRS3	DMRTA1
DHTKD1	DNAH9
DLD	DNAJC30
DMRTA1	DTX1
DMTN	DUSP4
DNAH9	ECH1
DNAJC30	ECHDC1
DTD2	ECHDC3
DTX1	ECHS1
DUSP4	EHHADH
E2F6	EIF4EBP2
ECHDC1	ELMOD3
ECHDC3	ELOVL3
ECHS1	EMC3
EFNB1	EPB41L4B
EHHADH	EPB42
EIF4EBP1	ERV3-1
EIF4EBP2	ESYT1
EIF5	ETFA
ELMOD3	ETFB
ELOA	ETFDH
ELOVL5	FAAH
EMC3	FABP9
ENPP1	FAH
EPB41L4B	FAIM
EPB42	FAM151A
ESR2	FAM166B
ESYT1	FAM168B
ETFA	FAM234A
ETFB	FAM240C
ETFDH	FAM47E
FABP4	FAM89A
FAH	FASN
FAM166B	FBXO27
FAM199X	FCN2
FAM219B	FFAR4
FAM234A	FGFBP2
FAM47E	FGFRL1
FAM83F	FITM2
FAM89A	FMC1
FASN	FOXN4
FBXO27	FOXP4
FCN2	FRMD4A
FFAR4	FTCDNL1
FGFBP2	FZD4
FGFRL1	FZD5
FITM2	G0S2
FLAD1	GABRE
FOXN4	GATB
FRMD4A	GCDH
FZD4	GCHFR
FZD5	GCLC
G0S2	GCSH
GABRE	GHR
GBE1	GINS3
GCDH	GJC3
GCLC	GLIS1
GCLM	GLRB
GCSH	GPAM
GHR	GPAT3
GINS3	GPATCH11
GJC3	GPBAR1
GLIS1	GPD1
GLP2R	GPD1L
GPAM	GPLD1
GPATCH11	GPR153
GPBAR1	GPR180
GPD1	GPT
GPR153	GPT2
GPR180	GPX4
GPT	GRK3
GPT2	GSE1
GPX4	GSTZ1
GRK3	GUCD1
GSE1	GYG2
GTF3A	GYS2
GUCD1	H2AJ
GYG2	HACD2
GYS1	HADH
GYS2	HAGH
HACD2	HCAR1
HADH	HCAR2
HAGH	HEBP2
HCAR1	HEPACAM
HCAR2	HINT2
HEBP2	HOOK2
HEPACAM	HR
HINT2	HSDL2
HIPK2	HSPB7
HOGA1	INPP5K
HOOK2	IRS2
HSDL2	ITGA7
HSPB6	ITPK1
HSPB7	KANK1
IDH1	KCNB1
ILRUN	KCNIP2
INPP5K	KLB
IRS2	KLF14
ITGA7	KLHDC8B
ITPK1	KLHL25
ITSN1	KLLN
KCNB1	KRT79
KCNE5	LAMB3
KCNIP2	LDHB
KIAA0100	LDHD
KIF1C	LEP
KLB	LETM1
KLF14	LGALS12
KLF15	LGR4
KLHDC8B	LIPE
KLHL25	LPL
KLHL31	LRIG1
LDHB	LRRIQ3
LDHD	LVRN
LEP	MACIR
LETM1	MAOA
LGALS12	MAOB
LIPE	MAP7D1
LNPEP	MAPT
LPIN1	MARCHF2
LPL	MARK1
LSS	MCCC1
LVRN	MCCC2
MACIR	MDH1
MAOA	ME1
MAOB	MECR
MAP7	MESP1
MAP7D1	MFSD3
MAPT	MGAT3
MARCHF2	MGST1
MAVS	MGST3
MCCC1	MIEF1
MCCC2	MKNK2
MDH1	MLXIPL
MEGF8	MLYCD
MESP1	MMD
MGAT3	MME
MGST1	MMP15
MGST3	MOCS1
MIEF1	MOGAT1
MKNK2	MPC1
MLEC	MRAP
MLX	MRAS
MLXIPL	MRPL46
MLYCD	MRPS11
MMD	MTARC1
MMP24OS	MTHFD1
MMUT	MTURN
MOCOS	MYH14
MPST	MYMX
MRAP	MYO16
MRAS	MYO1C
MRPL46	MYORG
MRPS33	MYZAP
MTARC1	NAT8L
MTCH2	NDUFA7
MTHFD1	NDUFB9
MTURN	NDUFC2
MXD4	NDUFS1
MYEOV	NDUFV3
MYH14	NET1
MYO16	NFU1
MYO1C	NKAPL
MYORG	NMB
NADK	NNAT
NANOS1	NPR1
NAT8L	NQO2
NATD1	NUDT8
NDRG4	NWD2
NDUFC2	NXNL1
NDUFV3	ORMDL3
NEDD4L	OXCT1
NFU1	PC
NKAPL	PCCA
NMB	PCCB
NMT2	PCK1
NNAT	PCK2
NNT	PCOLCE2
NPLOC4	PCYT2
NPR1	PDE3B
NRCAM	PDE8B
NRIP1	PDHA1
NSDHL	PDHX
NUDT8	PDK2
NXNL1	PDP2
OPLAH	PDXK
ORMDL3	PEBP1
OXCT1	PECR
PARVA	PEMT
PC	PEX11A
PCCA	PEX19
PCCB	PFKFB1
PCK1	PFKFB3
PCK2	PGM1
PCYT2	PGRMC1
PDE3B	PHLDA3
PDE8B	PHLDB1
PDHA1	PHYH
PDHX	PIEZO1
PDP2	PJA1
PDXK	PLAAT3
PDZD2	PLEKHG6
PECR	PLIN1
PEMT	PLIN4
PEX11A	PLIN5
PEX19	PMM1
PEX5	PNPLA2
PFKFB1	PNPLA3
PFKFB3	POLN
PGD	POLR2E
PGM1	POLR2L
PGRMC1	PPARG
PHLDA3	PPP1R16A
PHYH	PPP1R1A
PIEZO1	PPP1R1B
PIGS	PPP2R1B
PISD	PRADC1
PJA1	PRDX2
PKP2	PRDX6
PLAAT3	PRKAR2B
PLAAT5	PRKCD
PLCXD1	PRR18
PLD6	PRR5
PLEKHG6	PRRT4
PLIN1	PRXL2A
PLIN4	PSAT1
PLIN5	PSMD8
PLOD2	PTGER3
PLXNA4	PTPMT1
PMM1	PTPRF
PNPLA2	PWWP2B
POLDIP2	PXMP2
POLR2E	QDPR
POLR3H	RAC3
PPA1	RBP4
PPARA	RDH5
PPARG	REEP6
PPP1R16A	RETSAT
PPP1R1A	RGS3
PPP1R1B	RIDA
PRADC1	RMDN3
PRDX6	RNF157
PRKAR2B	RNPEPL1
PRKCD	RPLP2
PRRT4	RRAGD
PRXL2A	RTN1
PSMD8	RTN3
PTGER3	RTN4RL1
PTPRF	RXRA
PWWP2B	S100B
PXMP2	SAA1
PYGL	SAA2
QDPR	SAA4
RAB2A	SCD
RAC3	SCRN2
RASL10B	SDHA
RBP4	SDHB
RCL1	SETD9
RDH10	SGK2
RDH5	SIK2
REEP6	SLC15A5
REPIN1	SLC16A7
RETSAT	SLC19A3
RHOQ	SLC1A5
RIDA	SLC25A1
RMDN3	SLC25A10
RNF14	SLC25A16
RNF141	SLC25A20
RNF150	SLC25A33
RNF157	SLC25A51
RNF41	SLC27A2
RRAGC	SLC29A4
RTN3	SLC2A4
RTN4RL1	SLC5A6
RXRA	SLC66A2
S100B	SLC6A8
SAMM50	SLC7A10
SAR1B	SLC7A6
SCRN2	SNN
SEMA3G	SNTA1
SEPTIN11	SORBS1
SH3KBP1	SORT1
SHMT1	SPATA9
SIK2	SRCIN1
SLC15A5	SSU72
SLC16A7	STAT5A
SLC19A3	STBD1
SLC1A5	STK39
SLC25A1	STOX1
SLC25A10	STRADB
SLC25A16	SUCLA2
SLC25A18	SUCLG1
SLC25A33	SUOX
SLC29A2	SUV39H1
SLC29A4	SYNE3
SLC2A4	TALDO1
SLC2A8	TBC1D16
SLC35C1	TECR
SLC5A6	TENM3
SLC66A2	TESK1
SLC6A8	TF
SLC7A10	THRSP
SLC7A6	TIMP4
SMIM3	TK2
SNN	TKT
SOD1	TLCD2
SORBS1	TLN2
SORT1	TM7SF2
SPDYE3	TMEM120A
SPON1	TMEM132C
SRCIN1	TMEM164
SSB	TMEM268
SSC4D	TMEM52
SSU72	TNIP1
ST3GAL6	TRARG1
ST6GALNAC6	TRPM1
STARD7	TSKU
STAT5A	TST
STBD1	TTC38
STK39	TYRO3
STOX1	UCP2
STRADB	UQCRC2
STX11	UQCRFS1
SUCLA2	UQCRH
SUCLG1	VEGFB
SYN2	VKORC1L1
SYNE3	VTI1B
TAF8	WDR93
TALDO1	YBX2
TBC1D16	YWHAG
TEAD1	ZBED3
TECR
TENM3
TESK1
TEX2
TEX261
TF
TIMP4
TKT
TLCD2
TLN2
TM7SF2
TMEM120A
TMEM132C
TMEM164
TMEM169
TMEM268
TMEM52
TNFAIP8
TNIP1
TOM1L1
TP53I13
TRARG1
TREH
TRHDE
TRIM61
TSKU
TSPAN15
TSPAN3
TST
TSTD1
TTC36
TTC38
TTPA
TYRO3
UGP2
UHMK1
UQCRFS1
VEGFB
VKORC1L1
VTI1B
WASF3
WDR93
YBX2
YWHAG
ZBED3
ZBED6CL
ZBTB42
ZBTB7B
ZDHHC18
ZDHHC3
ZNF106
ZNF219
ZNF664
