# Supplementary material for: Constitutively active receptor ADGRA3 signaling induces adipose thermogenesis
Source: eLife journal article supplement (doi:10.7554/elife.100205), 2024-08-12
Supplement: fig1-data1 [file Figure 1D-Source Data 1.xlsx]

## Sheet: Sheet1
RPKM of mouse fat
Adrb3	Adgra3
163.43	5.268
111.78	8.02
