# Supplementary material for: Constitutively active receptor ADGRA3 signaling induces adipose thermogenesis
Source: eLife journal article supplement (doi:10.7554/elife.100205), 2024-08-12
Supplement: fig1-data1 [file Figure 1E-Source Data 1.xlsx]

## Sheet: Sheet1
RPKM of human fat
ADRB3	ADGRA3
0.117	4.017
0.111	5.491
0.093	5.277
