# Supplementary material for: Constitutively active receptor ADGRA3 signaling induces adipose thermogenesis
Source: eLife journal article supplement (doi:10.7554/elife.100205), 2024-08-12
Supplement: fig1-data1 [file Figure 1I-Source Data 1.xlsx]

## Sheet: Sheet1
Relative mRNA level of Adgra3				Relative mRNA level of Adipoq				Relative mRNA level of Ucp1
iWAT-SVF	iWAT-Adipocyte	BAT-SVF	BAT-Adipocyte	iWAT-SVF	iWAT-Adipocyte	BAT-SVF	BAT-Adipocyte	iWAT-SVF	iWAT-Adipocyte	BAT-SVF	BAT-Adipocyte
0.886279	2.10356	1.38668	2.35779	2.41251	43421.8	801.375	61998	2.41251	43421.8	801.375	61998
1.10147	1.86805	1.22038	2.58262	0.0649302	38003.2	836.391	65035.2	0.0649302	38003.2	836.391	65035.2
1.02437	1.62556	1.75301	2.43772	6.38388	43994.4	823.162	67188.8	6.38388	43994.4	823.162	67188.8
