# Supplementary material for: Constitutively active receptor ADGRA3 signaling induces adipose thermogenesis
Source: eLife journal article supplement (doi:10.7554/elife.100205), 2024-08-12
Supplement: fig1-figsupp1-data1 [file elife-100205-fig1-figsupp1-data1-v1.zip]

## Sheet: Sheet1
scWAT				viWAT
ADRB2	ADRB3	ADGRA3		ADRB2	ADRB3	ADGRA3
1.19368	0	0.919287		1.34361	0.076276	0.514813
1.13354	0.014437	0.908056		1.27485	0.032498	0.775683
0.968996	0.005309	0.884399		1.79741	0.277472	0.972203
1.20951	0.060509	0.766636		1.09726	0.193236	0.822822
1.78369	0	0.979412		0.75656	0.070703	0.684396
1.63919	0.007022	1.09237		1.17926	0.063333	0.948413
1.55847	0.030154	0.958086		1.63839	0.314078	1.02841
0.968576	0.224041	0.990161		0.706888	0.080807	1.10619
1.7751	0.239199	1.39445		1.3294	0.031085	0.757548
1.12189	0	0.897462		0.939469	0.133858	0.954435
1.54295	0.450711	1.06145		0.994757	0.056219	1.21378
1.52048	0.011866	0.780893		1.11261	0.034789	0.754654
1.33365	0.057095	0.910197		1.62696	0.029343	1.17667
1.37181	0.072654	0.904012		1.14333	0.029303	0.701999
1.78958	0	0.916612		1.56372	0	0.817499
1.03104	0.022964	0.922362		1.43185	0.09135	0.742725
1.80366	0	0.959661		1.38093	0.041985	1.08743
1.45849	0.147089	0.913761		1.32077	0.290769	1.13162
1.55546	0.03563	0.845346		1.0569	0.189687	0.908324
1.63306	0.00668	0.77144		1.39428	0.023623	0.832892
1.45056	0.012922	1.02755		1.19893	0.012078	1.15321
1.03969	0.020361	0.894925		1.30899	0.097084	1.16286
1.26458	0.009748	0.888292		1.19866	0.054651	1.15321
1.29513	0.15418	0.63488		1.08814	0.025756	0.961421
1.39759	0.037506	0.854731		1.34459	0.162385	1.07591
1.15473	0.034508	1.08063		1.23147	0.112973	0.909877
1.67422	0.01047	1.09447		1.65715	0.031247	0.896636
1.4183	0.054345	0.888404		0.711217	0.09802	0.906119
1.83992	0.26366	0.958421		1.25983	0.008259	0.630123
1.50705	0.040919	0.919287		1.12418	0	0.933993
0.713491	0.014647	0.669689		1.03117	0.070333	1.26458
1.44979	0.01473	0.66605		1.4524	0.257942	1.00911
0.926497	0.086395	1.07188		1.31387	0.029181	1.00251
1.47188	0	0.914925		0.959089	0.070075	0.999696
1.24944	0.014437	0.811776		1.31281	0.589503	0.903307
1.56038	0.100371	0.66323		1.65801	0	0.712229
1.04922	0	1.07664		1.1329	0.082319	1.02098
1.36773	0	0.908324		1.14737	0.445293	0.722963
1.81385	0.311754	0.964542		1.05956	0.384174	0.838723
1.32284	0.014226	0.726401		1.40278	0.059715	0.817102
1.26764	0.038302	0.909396		1.62097	0.023787	0.885813
1.32695	0.046066	0.75074		1.46015	0.050302	1.30728
1.03048	0.008217	0.97635		1.1313	0.114611	1.00945
1.32325	0.071182	1.01699		1.00724	0.180327	0.934498
1.28035	0.03535	1.00065		1.51601	0.126391	0.871748
2.00121	0.011105	0.625724		1.17173	0.010809	0.964684
1.29645	0.009918	1.00753		1.64404	0.406881	1.05461
1.62003	0.060811	0.902003		1.57008	0.067815	1.13418
1.43584	0.043362	0.895091		1.06483	0.010427	1.19811
1.88632	0.586475	0.932372		1.90091	0.257391	1.13065
1.27114	0	0.854974		1.53757	0.104146	0.811039
1.56074	0.143795	0.898231		1.25066	0.180241	0.982633
1.29226	0	1.02268		1.32716	0.105169	0.941064
0.444513	0.024568	0.795045		1.67988	0.333044	0.96009
1.62284	0.019199	0.764699		1.31555	0.452706	1.03189
1.71483	0.014605	0.908646		1.44483	0.043716	1.09167
1.49638	0.053731	0.987443		1.30428	0.159567	1.07773
1.59318	0.018076	0.857875		1.52892	0.059185	0.985202
1.05767	0.012289	0.994273		1.34557	0.465532	1.09691
1.47553	0.129851	0.761176		1.31112	0.069705	1.0083
1.48657	0.021851	0.895257		1.15014	0.026165	1.19285
1.54962	0.020527	0.796158		1.55182	0.043559	0.721646
1.47553	0.014226	0.904716		1.5768	0.166282	0.925518
1.03491	0.016657	1.06707		0.79796	0.071845	1.00078
1.45697	0.006124	0.781899		0.893651	0.288428	0.971369
1.22557	0.019241	0.901567		0.994845	0.049644	0.812245
1.33325	0.010173	0.970254		1.17143	0.073792	1.086
0.945074	0.03157	0.89878		1.05231	0.313656	0.857815
1.73119	0.021603	0.898506		1.46776	0.005309	1.13033
1.2887	0.217931	0.796713		1.23955	0.130912	0.478855
1.44169	0.00668	0.758458		1.49513	0.019075	1.21219
1.28713	0	0.792392		1.576	0.032458	1.11227
1.94017	0.140225	0.747179		1.19005	0.034588	0.783332
1.30642	0	0.979002		1.29907	0.327767	1.1726
1.54568	0.027023	0.818754		1.086	0.050844	1.15927
1.74241	0	0.88298		1.29292	0.049683	0.803321
1.58115	0	0.717587		1.12516	0.16776	0.854488
1.21059	0.053808	0.998956		1.14145	0.428621	0.806587
1.42716	0.065841	1.01355		1.27554	0.541829	1.02506
1.47929	0	0.912966		1.11093	0.007364	1.10072
1.11528	0.026329	0.872739		1.31973	0.006166	1.05994
1.69338	0.01895	0.949048		1.14176	0.07026	0.568084
1.455	0.013343	1.08885		1.03539	0.326541	0.817301
1.38202	0.014563	1.13609		1.42488	0.116076	1.03723
1.03695	0.018409	0.831806		1.88372	0	0.849665
1.41514	0.086858	0.959757		1.5523	0.026819	0.75929
1.26623	0.020154	1.01204		1.15106	0.066996	1.21906
1.08849	0.014605	0.823474		1.46538	0.043873	1.15503
1.35622	0	0.656769		1.86374	0.774079	1.00113
1.29203	0	0.948902		0.796436	0.141889	1.03137
1.37493	0.042536	0.900859		1.6149	0.072434	1.23274
1.61109	0.021644	0.480725		1.74772	0.164442	0.912169
1.31973	0.011486	0.969463		1.57669	0.012837	0.930898
1.48686	0.020775	1.0125		0.737113	0.150664	0.680154
1.56996	0.020941	0.875987		1.65021	0.041985	0.845842
1.20602	0.013132	0.793301		1.72041	0.081923	1.08027
1.01657	0.032498	0.673205		1.62325	0.029668	1.086
1.50161	0.048286	0.972388		0.990827	0.097951	1.077
0.908378	0.013259	0.984302		1.11494	0.011359	1.09933
1.44576	0.031974	0.888909		1.38453	0.098194	0.819412
1.42521	0.01119	0.869173		1.4618	0.005867	1.05154
0.780965	0.005009	1.14019		1.15957	0.084219	1.17869
1.56902	0.03535	0.96586		1.43902	0.118132	0.979412
1.32695	0.116242	0.781181		1.0379	0.368473	0.873204
1.65108	0.043991	0.874018		1.37731	0.161817	1.0197
1.87367	0.155549	0.841672		0.826204	0.498311	0.960471
1.07262	0	0.779236		1.32797	0.08554	0.981501
1.61836	0	0.741388		1.306	0	1.23754
1.75717	0.057894	1.06967		1.37107	0.257823	1.05115
1.34242	0	0.928805		1.086	0.10534	1.25164
1.14457	0	0.985561		1.1116	0.326336	1.03727
1.40569	0.023335	0.815511		1.64058	0.057324	0.870872
1.59505	0.021809	0.695744		1.08529	0.022305	0.922985
1.37181	0.0103	0.769599		1.28758	0.019532	1.28981
1.06707	0.047002	0.880471		0.901077	0.018368	0.814048
1.50024	0.100784	1.05308		1.46225	0.267336	1.01891
1.2887	0.075437	1.00385		1.42325	0.012669	1.21564
1.78483	0.236285	0.896526		1.26435	0.017284	0.81478
1.62818	0.135991	0.809762		0.883264	0.121593	1.03747
1.70295	0	0.935709		1.81598	0	0.598243
1.61857	0.073608	0.885926		0.802979	0.108057	1.23855
1.42439	0.033223	0.761251		1.03133	0	0.991758
1.4128	0.015402	0.850769		1.31366	0.473779	0.760875
1.35755	0.036309	1.02044		1.60336	0.063784	1.12678
1.74663	0.030195	0.855337		1.05423	0.091104	1.09026
1.66445	0.104487	0.713659		0.954773	0.141795	1.14983
1.60938	0.032095	0.969835		1.54556	0.167996	0.837336
1.58636	0.088668	0.988024		0.943791	0.037705	1.02735
1.75496	0.012204	0.845718		1.41414	0.054881	1.04297
1.08849	0.132836	0.718419		1.20925	0.072581	0.873495
1.41481	0.011063	0.824191		1.33304	0.104385	1.10992
1.2284	0.015569	1.07078		1.29137	0.063296	1.18865
0.936363	0.151339	0.976808		1.24502	0.096354	0.864214
1.10958	0.005952	0.75274		1.40415	0.185287	0.911104
1.63114	0	0.722305		1.46105	0.073021	0.91719
1.42439	0.029221	0.902003		1.35965	0.038342	0.709779
1.40088	0.294576	1.21484		1.47871	0.277838	0.84578
1.51095	0	0.787035		1.67934	0.085647	1.14488
1.33766	0.029992	0.895588		1.0209	0.632963	1.04032
0.907465	0	0.874192		1.29469	0.06487	1.08529
1.08493	0.016699	0.981139		1.03838	0	0.666799
1.83448	0.01473	0.773786		1.34498	0.045909	0.728841
1.39234	0.028409	1.01439		1.35774	0.083108	1.02873
1.43249	0.01473	0.65629		1.41212	0.10161	1.14019
1.28081	0.084004	1.08814		1.15625	0.035149	1.2071
1.26811	0	0.752125		1.39322	0.03866	1.00069
1.6668	0.284092	1.03503		1.12711	0.030114	0.595717
1.23045	0	0.602494		1.45788	0.026615	1.16997
1.4504	0.075182	0.941163		1.5876	0.960233	0.950608
1.39811	0.017576	0.97722		1.23779	0.134018	1.15564
1.7277	0.040958	0.955688		1.87593	0.354876	0.98847
0.962985	0.097361	0.860158		1.87944	0.009706	0.543199
1.22686	0.034187	1.10003		1.306	0.389698	0.965013
1.3904	0.122249	1.06633		1.61448	0.291258	1.09691
1.52504	0.056295	0.888404		1.27623	0	0.906604
1.72099	0.040998	0.882297		0.887054	0.022552	0.831422
1.8099	0.275404	0.981229		1.233	0.033384	1.09795
1.15987	0.033986	0.937518		1.39252	0.309204	1.10483
1.55666	0.012204	0.78831		1.06595	0.186137	1.00004
1.25983	0.028327	0.719497		1.58636	1.11059	0.933285
1.32325	0	0.793371		1.37328	0.175628	1.08422
1.48827	0.050998	1.07628		1.37767	0.379849	1.25792
1.13226	0	0.815312		1.32015	0.040325	0.910838
1.3075	0.015779	0.493458		0.922622	0.059563	0.960709
1.64395	0	0.629817		1.45117	0.156761	0.93927
1.23452	0.035069	0.918712		0.959423	0.161398	0.808549
1.42177	0.008004	0.932981		1.14145	0.723948	0.860578
2.01787	0.13491	0.644734		1.05729	0.33706	0.882069
1.79407	0	0.470116		1.36511	0.119256	0.904391
1.51068	0.052963	0.765966		1.48601	0.158724	1.10585
1.47436	0.0103	0.997343		1.22427	0.006423	1.12353
1.62273	0.026043	0.893762		1.22168	0.510947	1.05538
1.21458	0.005781	0.665112		1.23654	0.319938	1.00638
1.57507	0.011528	0.882069		0.773128	0.131587	0.659155
1.28194	0.013427	0.901567		1.15168	0.189462	1.14019
1.33586	0.126748	1.00915		1.45271	0.155306	0.921478
1.57368	0.089057	0.891816		1.26881	0.052694	0.821645
1.40569	0.013048	0.959328		1.24993	0.024691	1.3218
1.80523	0.071551	1.09237		1.02313	0.007236	0.738781
1.48883	0.054919	1.04032		1.51865	0.174118	1.10209
0.996687	0.02387	1.1345		1.14551	0.019573	0.997212
1.94345	0.116242	1.02445		1.17696	0.144512	0.95885
1.7303	0	0.954435		1.38632	0.298198	0.903904
1.40449	0.01649	0.796644		1.3962	0.103804	0.759517
1.25018	0	0.842047		1.20058	0.00445	1.22763
1.8374	0.037307	0.93892		1.55413	0.010088	0.81298
1.92932	0.016992	0.919444		1.11661	0.024978	1.09061
1.57391	0.056409	0.818622		1.61627	0.030681	0.93837
1.39568	0	1.00911		1.40346	0.030114	0.887786
1.77137	0	0.97382		0.999783	0	0.811642
1.10346	0.075364	1.05956		1.90244	0.28594	1.02131
1.14426	0.013511	0.999348		1.45999	0.029911	0.939869
1.64464	0.284544	0.796782		1.13226	0.208011	1.0667
1.59373	0.054077	1.04139		1.19535	0.0172	1.46255
1.35774	0.034027	0.970997		1.39777	0	1.10415
1.74858	0	0.888573		1.73592	0.699231	1.11893
1.7124	0.041669	1.12678		1.60347	0.210693	1.12353
1.39881	0.009621	1.12385		1.37912	0.175425	1.08314
1.47026	0.016239	0.928652		1.58161	0.205015	1.15412
1.6249	0.092931	0.701222		1.44217	0.063408	1.0242
1.34044	0	0.540079		1.40329	0.160378	1.01043
1.60401	0.034508	0.927062		1.51282	0.025593	1.23477
1.66001	0.087746	0.930491		1.14176	0.01473	1.16137
1.57415	0.089587	0.961469		1.08955	0.044853	1.29026
1.34791	0.009833	0.974834		1.21219	0.093492	0.674402
1.4283	0	0.952841		1.69302	0.149312	0.970672
1.36773	0.141638	1.00381		1.29973	0.297038	1.18384
1.39182	0.026901	0.862012		1.35005	0	0.869114
1.49485	0.041669	0.871281		1.33224	0.413803	1.1807
0.924744	0.037028	1.00941		1.84036	0.062055	1.03092
1.59273	0.066177	1.09552		1.12678	0.157849	1.03133
1.41313	0.071661	1.14768		1.23654	0	1.05994
1.59362	0	0.953905		1.3934	0.236084	1.10278
1.27898	0.017784	0.762153		1.99699	0.011993	0.745075
1.80099	0.0103	0.678245		1.36773	0.029668	0.784332
1.78326	0.384712	1.13893		1.47972	0.519828	0.810434
1.82164	0.14619	0.975202		1.37967	0.189518	0.786538
1.12775	0.129658	0.449015		1.27508	0.044383	0.983852
1.44107	0.054038	0.975983		1.45393	0.156398	1.24551
2.02407	0.262024	1.07482		1.83942	0.493179	1.17348
1.33163	0.01102	1.18355		1.09272	0	1.14891
1.35083	0.092264	0.976808		1.23376	0.434729	0.82243
1.69723	0.016323	1.00557		1.23096	0	0.877314
1.67459	0.026329	1.09272		1.82905	0.08803	0.820136
1.12385	0	0.828144		1.29513	0.101025	0.865459
1.91185	0.506776	0.806926		1.78923	0.034308	1.06856
1.78944	0.014184	0.883548		0.906766	0.017367	0.627468
1.42927	0.114844	1.08458		1.73672	0.051693	1.07918
1.40329	0.020568	0.751741		1.81948	0.017784	1.33706
1.14922	0.061302	0.804412		1.61204	0.046495	1.04571
1.75967	0.019573	0.989672		1.44731	0.126813	0.940566
1.44185	0.018492	0.873611		1.00108	0.067108	0.847141
1.35679	0	0.858958		1.83487	0.436163	1.08458
1.87419	0.018118	0.954146		1.64914	0.073352	1.02338
1.62716	0	0.961611		1.09552	0.054613	1.32346
1.53326	0	0.828789		1.50934	0	1.04179
1.33041	0.02735	0.958468		1.05994	0	1.24895
1.17348	0.044971	0.996862		1.25624	0.476832	1.09307
1.04336	0.049257	1.32919		1.70706	0.142483	0.963599
1.71315	0.089623	0.941462		1.55931	0.034267	0.985112
1.88053	0.013848	1.09412		1.40756	0.032296	0.792322
1.36474	0.026778	0.972851		1.53326	0.06774	1.28556
1.26103	0.016407	1.00078		1.25406	0.012584	1.01682
1.27623	0.017075	0.932727		1.50637	0.079941	0.837273
1.42177	0.062168	1.02284		1.46255	0.824646	0.900749
1.15014	0.075583	0.8238		1.70791	0.096702	1.02751
1.08135	0.012162	0.891147		1.34341	0.036629	1.36003
1.48615	0.048364	0.789581		1.51548	0.068594	1.18611
1.3707	0.048248	1.07262		1.56455	0.022593	0.691877
1.49248	0	0.880127		1.92998	0.023664	1.0607
1.66039	0	0.923089		1.24969	0.483159	1.19728
1.52956	0.042615	1.15503		1.70586	0.794	1.16967
1.31597	0	0.984302		1.39375	0.018034	1.24969
1.53084	0	0.894648		1.18554	0.050534	1.26576
1.53275	0.033504	0.822952		1.36021	0.540455	1.05767
1.31154	0.070629	0.864214		1.41044	0.048209	0.994317
1.36642	0.016365	0.805637		1.46075	0	0.976946
1.08529	0	0.933639		1.65906	0.136752	1.12385
1.48869	0.01473	1.00826		1.15806	0.031368	1.22634
1.76664	0.963363	0.778658		1.40363	0.038938	1.11461
1.69766	0.029749	1.1807		1.54245	0.015318	1.07954
1.28556	0	0.922881		1.72444	0.162146	1.23325
1.40586	0.022799	0.882866		1.22402	0.101266	1.10992
1.3485	0.018992	0.917138		1.3969	0.094192	1.25696
1.66699	0.004794	0.762679		1.21669	0.019449	0.741309
1.09061	0.008856	0.877371		1.57956	0.014184	1.17696
1.44716	0.081347	1.04493		1.21405	0.225929	0.745621
1.41647	0	0.951775		1.04999	0.61595	0.847388
1.66764	0.016616	0.857272		1.17493	0.095797	0.919967
1.25503	0.015444	0.981366		1.35507	0.072213	1.04961
1.41614	0.043716	0.856245		1.4128	0.280168	0.694868
1.42456	0.012078	0.857031		1.05038	0.025961	0.871515
1.12156	0.010936	0.929266		1.51055	0.012415	1.04096
1.43007	0.00779	1.01953		1.24055	0.02214	0.979776
1.26623	0.020817	0.910944		1.37088	0.053539	1.19312
1.49693	0.023088	0.992598		1.42504	0.029262	1.06371
1.37199	0	0.895975		1.2584	0.089446	0.93872
2.09621	0.01473	0.940666		1.09237	0.062808	1.35122
1.11328	0.1983	0.950414		1.65234	0	1.1959
1.23805	0.05778	1.01389		0.988291	0.0463	1.09061
1.27554	0	0.955255		1.15927	0.11411	0.546049
1.11793	0.045675	0.81961		1.3518	0.024855	1.20466
1.0667	0.030843	0.814314		1.18041	0.328176	0.87204
1.81803	0	0.905364		1.56785	0	0.870638
1.18554	0.136562	0.908431		1.33626	0.029546	0.852053
1.3653	0.103325	1.02649		1.75412	0.080554	0.648458
1.72008	0	0.982994		1.51068	0	0.97465
1.26741	0.009748	0.944927		1.51957	0.038859	0.586362
1.85291	0	0.950316		1.20898	0.572291	1.22037
1.3753	0.065654	0.932879		1.13513	0.073425	0.864748
1.60917	0.010978	0.848189		1.33062	0.28695	0.872739
1.62128	0.084683	0.956936		0.597695	0.011655	1.16791
1.39898	0.027879	0.883945		1.0035	0.007449	0.952163
0.89592	0.014142	0.781324		1.37512	0.04587	1.18041
1.43569	0.059639	1.01816		0.846337	0.018201	0.981864
1.46359	0.012331	0.848312		1.59006	0.012626	0.836261
1.1245	0.030883	0.972157		1.31069	0	0.679882
1.67961	0.54058	0.95226		1.22994	0.029465	1.09517
1.22324	0.024773	0.826852		1.38721	0.088526	1.0799
1.42521	0.005309	0.711301		1.20112	0.844664	1.18611
1.35755	0	0.940317		1.41027	0.668479	0.810501
1.21484	0.033223	0.817301		0.914766	0.04293	0.90064
1.33325	0	0.90309		0.930236	0.320769	0.872156
1.38917	0	0.531862		1.10483	0.021603	1.11628
1.19645	0	0.782831		1.04805	0.010809	0.878004
1.46716	0.106565	0.746712		1.55606	0.463744	0.762754
1.5611	0.003891	0.862251		0.995591	0.119454	0.593286
1.26694	0.014016	0.63759		1.46776	0.429752	1.17173
1.66125	0.021851	0.744684		1.64552	0.013596	1.18611
1.75297	0.024157	0.732876		1.41095	0.043755	0.83353
1.58984	0.035069	0.745777		0.948609	0.102365	0.902329
1.15715	0.024486	0.899711		1.37949	0.015444	0.781468
1.10551	0	0.690462		1.65591	0.267172	1.11428
1.4929	0.054881	0.88298		1.70217	0.657725	1.05423
1.17493	0.05007	0.764699		1.35083	0.304706	0.912753
1.37273	0.110893	0.995854		1.08885	0.094366	1.12057
1.84597	0.010045	0.721481		1.26717	0.026533	0.983897
1.53807	0.050921	1.02127		0.835373	0.160108	0.84398
1.51917	0	0.915453		1.51891	0.241322	1.04532
1.58115	0.043755	0.733438		1.52686	0.060736	1.16524
1.78711	0.011866	0.982135		1.82295	0.033343	0.926754
1.7956	0.002684	0.862787		0.936865	0.121822	1.25527
1.29248	0.032095	0.839855		1.25936	0	0.830845
1.47943	0	0.777717		0.87564	0.077876	0.710117
1.48968	0.018867	0.709185		1.18441	0.040009	1.14301
1.48515	0.064832	0.75473		1.28285	0.15235	0.973728
1.53199	0.018243	0.851747		1.51242	0.054268	0.904174
1.42128	0.123492	1.05805		0.750971	0.14145	1.03342
1.83487	0.017868	1.04883		1.48015	0.007876	1.18298
1.32077	0.375481	0.947777		1.266	0.061452	0.920071
1.50947	0.005438	0.616895		1.2266	0.271144	1.25188
1.10243	0.044814	1.01515		0.969556	0.112203	0.796852
1.2982	0.02983	0.793441		1.05919	0.05377	0.888179
1.33041	0	0.755341		1.31702	0.052232	1.01081
1.37512	0.01047	0.965719		1.24822	0.011105	0.779452
1.34005	0.068409	0.908056		1.67979	0.226265	0.903633
1.62788	0.018409	0.631038		1.30211	0.044618	0.819017
1.38039	0.006081	0.837146		1.24279	0.17269	0.977586
1.58024	0.233326	0.907949		1.61972	0.044148	0.916296
1.47451	0.138113	0.887617		1.4456	0.054498	1.14333
1.58715	0.028693	0.851686		1.02449	0.13226	0.810703
1.70088	0.005223	0.887392		1.4221	0.005438	1.03727
1.15534	0.084433	0.961184		1.48044	0.238774	0.65244
1.09726	0.019075	0.99189		0.904174	0.067815	0.928396
1.20602	0.014268	0.943		1.03894	0.126651	0.972203
1.96185	0.226084	1.01712		1.44373	0.272259	1.028
1.24748	0	1.0289		0.954098	0.012542	0.92028
1.18412	0.012669	1.04805		1.25696	0.937819	0.933487
1.35946	0.110084	1.01528		1.4456	0.144761	0.866642
1.45606	0	0.792882		0.875351	0.087781	0.712986
0.951532	0.101025	0.761778		1.06595	0.020651	1.13194
1.29754	0	0.81124		1.45591	0	0.57588
1.17435	0.023952	0.942207		1.35736	0.042024	0.689841
1.88739	0.385428	0.884285		1.47538	0.562531	1.02044
1.50705	0	0.923607		1.51865	0.391993	0.92557
1.53453	0.07664	0.790285		1.52427	0.010045	0.823083
1.83986	0.048442	0.831166		1.24155	0.173623	0.750663
1.36605	0	0.961279		1.7647	0.172924	1.07078
1.69644	0.209997	1.00268		1.38632	0.086289	1.14082
1.38112	0	1.01144		1.3249	0.011147	1.03571
1.37493	0	0.893096		1.15351	0.500236	1.08099
1.56253	0.109714	0.772395		1.18865	0.115544	1.01085
0.72403	0.040246	1.10992		0.683587	0.022222	0.889862
1.44638	0	0.40432		1.19645	0.359266	1.00009
1.49941	0.037466	0.962653		1.35583	0.029668	0.991492
1.5523	0	1.01204		1.34811	0.436957	0.995284
1.35813	0.068668	0.974834		1.1313	0.012669	1.0146
1.18977	0.070666	1.04805		1.42521	0.030843	1.03675
1.8327	0.027553	0.917558		1.60938	0.044697	1.20439
1.68106	0	0.729165		1.63569	0.034468	1.15715
1.2003	0.018867	0.717254		1.11628	0.199234	0.958038
1.39794	0.013006	0.829561		1.45728	0.096493	0.964542
1.62614	0.020071	0.808346		1.08849	0.235048	0.92814
1.6894	0.056791	1.06521		1.47683	0.255224	1.02755
1.25382	0.008643	1.09342		1.83461	0.046729	0.898122
1.60065	0.024896	0.877429		1.56538	0.008046	0.841234
1.39881	0	1.07846		1.13033	0.256357	1.06296
1.29425	0.004321	0.845842		1.75959	0.010258	1.10346
1.77706	0	0.606166		1.47217	0.021355	0.937117
1.04415	0.011782	0.619302		1.39603	0.019116	0.718502
1.38435	0	0.712144		1.75831	0.364363	0.979685
1.56407	0.01368	0.892929		1.63639	0.238799	1.21032
1.35851	0.120376	1.09026		1.28194	0.12496	0.896416
1.70783	0.118364	0.989672		1.02747	0.06472	0.482445
1.1284	0.181844	1.00548		1.63859	0.758306	0.972527
1.07737	0.040246	0.960185		1.02788	0.065878	1.01081
1.48897	0.377488	1.03671		1.29425	0.701999	0.949731
1.22557	0.007577	0.877602		1.48643	0.013385	0.992509
1.26174	0.028978	0.928345		1.16376	0.358696	1.00312
1.47026	0.05778	0.979912		1.36791	0.011317	1.086
1.92184	0.413803	1.04883		1.32838	0.195844	0.969789
0.994185	0.046144	0.89137		1.94876	0.219139	0.858778
1.2335	0	0.944779		1.30835	0.345178	1.11126
1.48572	0	0.914608		1.22686	0.1869	1.03647
1.20683	0.012162	0.985696		1.51878	0.055302	1.05614
1.46389	0	1.04493		0.682416	0.016866	1.2737
1.7495	0	0.937217		1.26741	0.075255	0.759366
1.7344	0.051114	0.711217		1.2335	0.024568	0.75618
1.48785	0.107922	0.873262		1.42846	0.254185	1.01165
1.61405	0.168291	0.900312		1.80229	0.008089	0.884569
1.19783	0.051307	0.909823		1.35813	0.044853	1.06521
1.45728	0	0.841234		1.31994	0.032699	1.12743
1.7893	0.319106	0.955688		1.13513	0.11237	0.862668
1.06967	0	0.928345		0.968249	0.642168	0.836324
1.59999	0.051268	0.874308		1.05729	0.181443	0.723291
1.64138	0.273857	0.892206		1.2869	0.20306	0.998695
1.34869	0.040167	1.0379		1.11193	0.01603	0.858718
1.63448	0.0141	1.18384		1.02226	0.124993	1.00264
1.67413	0.060811	1.11261		1.43345	0.204744	0.921426
1.59118	0	1.0306		1.25406	0.011274	0.631444
1.54814	0.026002	0.866405		1.84105	0.073205	1.00869
1.90091	0.106225	0.663889		1.36773	0.112873	1.06258
0.90271	0.05618	0.927627		1.69152	0.066177	0.923348
0.803252	0	0.845656		1.29115	0.195485	0.960946
1.78718	0.61679	0.992023		1.13194	0.051423	0.775392
1.84224	0.005309	0.930491		1.23172	0.053309	0.929061
1.17493	0.015066	0.979639		1.13925	0.077876	1.01456
1.46315	0.011993	0.930032		1.08063	0.128819	0.904878
1.60097	0	0.645815		1.35774	0.308778	1.11294
1.78383	0.497897	0.92814		1.36078	0.62128	0.857634
1.83645	0.033223	0.770042		1.1313	0	0.807264
1.19756	0.127202	0.805773		1.39358	0.046417	0.889974
1.4609	0	0.913761		1.33385	0	1.13481
1.4901	0.147212	0.959566		1.62066	0.703033	0.721398
1.75136	0.003805	0.613947		1.51375	0.022552	1.02403
1.40943	0	0.887167		1.53173	0.07784	0.531479
1.22557	0.140257	0.992819		1.40054	0.042418	0.818424
1.63407	0.009706	0.839855		1.3543	0.010936	1.27091
1.36474	0.005738	0.990428		1.08207	0.523616	0.760045
1.65099	0.018368	1.02061		1.82705	0.067889	1.06744
1.66125	0	1.03019		1.50161	0.020693	1.09167
1.53186	0	1.01165		1.21192	0.029668	0.986861
1.52479	0.199453	0.943346		1.21352	0.109815	0.717088
1.68314	0.052001	0.751356		1.48444	0.48373	1.10003
1.19145	0.050341	0.84211		1.15776	0.017701	0.85382
1.18412	0	0.871748		1.09167	0.033021	0.840608
1.5227	0.01119	0.876102		1.38579	0	0.916875
1.38775	0.017743	1.02222		2.0607	0.00488	1.18298
1.70638	0	0.875061		1.48101	0	0.911903
1.80618	0.038461	0.886491		1.05767	0.050882	0.618676
1.33626	0.580583	0.807535		0.834929	0.363424	1.11328
1.2393	0.058198	1.17114		1.38435	0.963741	0.880127
1.63033	0	0.693551		1.16879	0.271028	1.04532
1.66351	0.040444	1.09237		1.67843	0	1.55847
1.73926	0.02686	0.931458		1.29137	0	1.13893
1.49066	0.024075	0.965155		1.19005	0.053078	0.918869
1.10687	0	0.874945		1.05729	0.088738	1.04844
1.35199	0.019947	0.780677		1.3485	0.102811	1.13065
1.7001	0.115444	0.873262		0.522966	0.226883	0.863323
1.83289	0.41397	0.953228		1.52022	0.164293	0.919967
1.65715	0.085041	1.07809		1.51693	0.028368	0.702689
1.47943	0.00715	0.952744		1.09621	0.11133	0.893262
1.51838	0	0.853333		1.12123	0.187267	0.838912
1.56679	0	1.05576		1.4748	0.086431	1.19089
1.53033	0.006124	0.840733		1.17696	0.059828	0.706718
1.51282	0.906981	1.03667		1.15014	0.757851	1.04108
1.74052	0.025142	1.13925		1.30728	0.063296	1.05614
1.40688	0.03858	1.06483		1.38093	0.05065	1.05729
1.38453	0	1.05077		1.80113	0.254838	1.21431
1.25188	0.943148	0.815777		1.79906	0.197584	1.21352
1.6039	0	0.797198		1.19117	0.045323	1.17754
1.66314	0.00638	0.629512		1.93505	0	1.00949
1.42439	0.014142	0.809156		1.05038	0.073168	1.00852
1.40943	0.02547	1.09342		1.15927	0.031974	1.01966
1.28892	0.046261	1.07628		1.66811	0	1.28488
1.25959	0.574726	0.925054		1.27393	0.05945	1.0054
1.19089	0.01895	1.10755		1.39129	0.051191	1.01305
1.10278	0.032377	1.08529		1.24229	0.038302	1.09026
1.11227	0.050882	0.777644		1.22994	0	1.3955
1.00518	0.00668	0.682235		0.976304	0.133347	0.8074
1.37876	0.010597	1.00788		1.1729	0.110253	1.28803
1.27715	0.078928	0.838975		1.73616	0.062883	0.763727
1.43473	0	0.902438		1.34439	0.078566	1.15106
1.68502	0.00762	0.968109		1.63053	0	0.987711
1.34321	0.08023	0.950803		1.16137	0.11591	0.793371
1.43136	0.038262	1.02999		1.31239	0.827692	1.09412
1.33626	0.011063	1.03028		1.21484	0.255248	1.13672
1.54876	0.009451	1.08099		1.24502	0.021355	0.870404
1.78039	0.046768	0.911903		1.46449	0.03286	1.12646
0.993304	0.005181	1.11126		0.974788	0.360783	1.00621
1.88258	0.143826	1.18582		1.45347	0.055378	0.871865
1.60959	0.025797	0.74679		1.21005	0.16988	0.950754
0.992111	0.004837	0.879726		1.41229	0.204174	0.992509
1.58659	0	0.856366		1.32201	0.120804	1.03286
1.86864	0.829497	1.07773		1.29579	0.005567	1.12024
1.57136	0.07675	1.09377		1.38453	0.047431	1.04048
1.42488	0.146965	1.15229		1.31931	0.189911	0.623559
1.42488	0.041353	1.07041		1.63719	0.18574	1.01519
1.35755	0.196756	0.916033		1.19312	0.183754	0.85034
1.00788	0.041748	0.925621		1.57124	0.150818	1.11361
1.16554	0.114344	0.870872		1.40243	0.370328	1.17435
1.48799	0	0.90064		1.24378	0.026778	0.919758
1.45652	0.003547	0.820136		1.06893	0.070407	0.66792
1.1959	0.036429	1.01641		1.36267	0.011486	0.900422
1.50501	0	0.789299		1.00091	0.472318	0.97534
1.66096	0.160288	0.832764		0.90531	0.066363	0.756712
0.910037	0.03583	0.82808		1.36248	0.243361	1.03715
1.61521	0	1.02354		0.974327	0.031368	1.1685
0.751356	0.209274	0.973774		1.22891	0.339054	0.698535
1.26505	0.75496	1.08672		1.52401	0.092405	1.13893
1.17638	0.037546	1.21272		1.22141	0.548758	0.954001
1.3604	0.171551	1.2307		1.15198	0.106769	0.856185
1.75793	0.130366	1.05538		1.14051	0.033303	0.828853
1.63246	0.01515	1.02662		1.65273	0.069594	0.876391
1.55059	0	0.923607		1.5605	0	1.13226
1.75335	0.006765	0.703893		1.12775	0.184464	0.846523
1.79754	0.430398	1.38543		1.29557	0.314499	1.19618
1.43072	0.013806	1.086		1.70935	0.0408	1.04961
1.85175	0.3485	0.992907		1.57148	0.988425	1.0114
1.2284	0.053846	1.12905		1.29469	0.229426	1.15106
1.29513	0.063821	1.1245		1.52244	0.113509	1.22194
1.47857	0.020693	1.17493		1.33546	0.011909	1.07262
1.63195	0.027716	0.877889		1.40243	0.311966	0.896802
1.69688	0	0.796436		1.1726	0.252222	0.969649
1.65215	0.04817	0.883832		1.22479	0.743902	0.926085
1.18241	0.117801	0.660391		1.64729	0.130977	1.03084
1.6988	0.383815	0.818028		0.841359	0.083789	1.04961
1.56667	0.024937	1.16137		1.05346	0.604442	1.06221
1.61289	0.006765	1.08135		1.13577	0.204961	0.823213
1.08243	0	0.997212		1.00928	0.119091	1.01402
1.56832	0.023541	1.18298		1.40603	0.147151	1.03262
1.67697	0.040761	0.895809		1.19673	0.070297	1.05308
1.12353	0.038898	1.11926		1.4456	0.532882	0.842422
1.30233	0.012753	0.850952		1.81245	0.059298	0.946305
1.58013	0.012964	0.760347		1.08207	0.049528	0.800305
1.75251	0.017743	0.875235		1.37051	0.025634	1.04493
1.80257	0.669131	1.10653		1.43791	0.051384	0.880642
1.4813	0.020693	1.09968		1.11661	0.33965	0.725013
1.3927	0.021933	1.06819		1.58229	0.207419	0.971322
1.63939	0.284431	1.13322		1.5432	0.465532	0.955592
1.63919	0.010554	0.97973		1.45939	0.208441	0.885022
1.04689	0.379849	0.825296		0.967782	0.054153	0.478855
1.27554	0.005652	1.11991		1.14891	0.117304	0.968109
1.16137	0.311966	0.989672		1.82112	0.182586	0.919601
1.82471	0.482874	1.02612		1.23376	0.387212	0.912541
1.78873	0.091139	1.01724		1.36021	0.498862	0.839981
1.44669	0.01695	1.03314		1.57484	0.063333	1.16702
1.30125	0.037028	1.07445		0.902818	0.011274	0.675778
1.25188	0.087497	0.906119		0.970672	0.216799	0.981229
1.07918	0	1.01486		1.4624	0.304921	1.12254
1.35774	0.005266	0.902873		1.03157	0.129206	1.03503
1.42797	0.046105	1.09899		1.42797	0.046105	1.09899
1.3707	0	0.423901		1.3707	0	0.423901
1.5807	0.469085	1.09237		1.5807	0.469085	1.09237
0.804139	0.06149	0.895754		0.804139	0.06149	0.895754
1.629	0	0.835056		1.629	0	0.835056
1.44436	0.009111	0.988826		1.44436	0.009111	0.988826
1.52283	0.012078	0.907465		1.52283	0.012078	0.907465
1.17406	0.065206	1.11561		1.17406	0.065206	1.11561
1.18298	0.129915	1.06893		1.18298	0.129915	1.06893
1.42684	0.030154	0.761702		1.42684	0.030154	0.761702
1.47914	0.013932	1.01043		1.47914	0.013932	1.01043
1.32346	0	0.928601		1.32346	0	0.928601
1.40909	0.011528	1.14176		1.40909	0.011528	1.14176
1.72746	0.206934	1.05614		1.72746	0.206934	1.05614
1.43007	0.353916	0.943346		1.43007	0.353916	0.943346
1.23502	0.046261	0.975202		1.23502	0.046261	0.975202
1.07004	0.009408	0.830653		1.07004	0.009408	0.830653
1.77107	0.331022	0.94166		1.77107	0.331022	0.94166
0.937869	0.009791	0.999131		0.937869	0.009791	0.999131
0.863025	0.037586	0.918764		0.863025	0.037586	0.918764
1.38596	0	0.860278		1.38596	0	0.860278
1.26174	0.006979	0.838093		1.26174	0.006979	0.838093
1.19507	0.014058	0.975202		1.19507	0.014058	0.975202
1.16435	0.015695	1.03019		1.16435	0.015695	1.03019
1.92449	0.014437	0.934044		1.92449	0.014437	0.934044
1.2003	0	0.998129		1.2003	0	0.998129
1.48202	0	0.873088		1.48202	0	0.873088
1.28646	0.069964	0.905796		1.28646	0.069964	0.905796
1.15806	0.005138	1.028		1.15806	0.005138	1.028
0.895036	0.027594	1.1685		0.895036	0.027594	1.1685
0.940118	0.037307	1.0035		0.940118	0.037307	1.0035
1.10415	0.085505	1.08422		1.10415	0.085505	1.08422
1.16406	0.033786	0.968996		1.16406	0.033786	0.968996
1.15655	0.021644	0.710287		1.15655	0.021644	0.710287
1.14983	0.014437	0.988514		1.14983	0.014437	0.988514
1.11093	0	1.0667		1.11093	0	1.0667
1.2235	0.052309	0.971925		1.2235	0.052309	0.971925
1.62614	0.035029	0.904337		1.62614	0.035029	0.904337
1.63659	0.263636	0.945715		1.63659	0.263636	0.945715
1.5731	0.208549	0.613102		1.5731	0.208549	0.613102
1.90639	0.030478	0.702517		1.90639	0.030478	0.702517
1.35927	0.010978	0.767749		1.35927	0.010978	0.767749
1.53148	0.390582	0.902057		1.53148	0.390582	0.902057
1.20331	0.048947	0.899547		1.20331	0.048947	0.899547
1.46776	0.059942	0.853455		1.46776	0.059942	0.853455
1.30835	0.06989	1.08707		1.30835	0.06989	1.08707
1.33284	0.013806	0.894759		1.33284	0.013806	0.894759
1.66773	0.067145	1.04727		1.66773	0.067145	1.04727
1.18497	0.200221	1.01803		1.18497	0.200221	1.01803
1.2014	0.01174	1.05576		1.2014	0.01174	1.05576
1.50106	0	0.977129		1.50106	0	0.977129
1.30814	0.229503	0.903361		1.30814	0.229503	0.903361
0.988068	0.005824	0.879898		0.988068	0.005824	0.879898
1.45133	0.011147	0.767749		1.45133	0.011147	0.767749
1.70303	0.074743	1.02719		1.70303	0.074743	1.02719
1.10823	0.023582	0.878349		1.10823	0.023582	0.878349
1.25936	0	0.913973		1.25936	0	0.913973
1.20085	0.023993	0.91782		1.20085	0.023993	0.91782
1.35603	0	0.802226		1.35603	0	0.802226
1.48359	0	0.911477		1.48359	0	0.911477
1.41996	0.014142	0.87396		1.41996	0.014142	0.87396
1.16406	0	0.927627		1.16406	0	0.927627
1.8173	0.586925	0.945025		1.8173	0.586925	0.945025
1.77188	0.252538	0.780461		1.77188	0.252538	0.780461
1.37912	0.053885	1.11926		1.37912	0.053885	1.11926
1.50297	0.068483	0.887561		1.50297	0.068483	0.887561
1.22168	0.059033	0.985292		1.22168	0.059033	0.985292
1.2235	0.084469	1.04375		1.2235	0.084469	1.04375
1.41162	0.028978	0.914977		1.41162	0.028978	0.914977
1.3897	0.23124	0.86676		1.3897	0.23124	0.86676
1.28556	0.003934	0.900422		1.28556	0.003934	0.900422
1.69099	0	0.780605		1.69099	0	0.780605
1.08955	0.141262	1.02662		1.08955	0.141262	1.02662
1.3653	0.102194	1.0216		1.3653	0.102194	1.0216
1.70612	0.028531	0.87204		1.70612	0.028531	0.87204
1.52075	0.007534	0.950608		1.52075	0.007534	0.950608
1.1116	0.059639	0.971971		1.1116	0.059639	0.971971
1.39967	0.271516	0.752125		1.39967	0.271516	0.752125
1.50947	0.029587	0.858056		1.50947	0.029587	0.858056
1.11561	0.055417	1.04375		1.11561	0.055417	1.04375
1.15625	0.013469	0.94807		1.15625	0.013469	0.94807
1.40295	0.215743	1.09968		1.40295	0.215743	1.09968
1.06446	0.022841	0.918502		1.06446	0.022841	0.918502
1.42943	0.013848	1.10209		1.42943	0.013848	1.10209
1.2403	0.030154	0.72444		1.2403	0.030154	0.72444
1.52994	0.006423	0.56134		1.52994	0.006423	0.56134
1.18977	0.025347	0.979457		1.18977	0.025347	0.979457
1.41196	0	0.79789		1.41196	0	0.79789
1.64157	0.040127	1.15014		1.64157	0.040127	1.15014
1.40261	0.04289	0.798996		1.40261	0.04289	0.798996
1.35353	0	1.06744		1.35353	0	1.06744
1.84105	0.062356	1.32736		1.84105	0.062356	1.32736
1.52943	0.044148	1.11528		1.52943	0.044148	1.11528
1.83512	0.068112	1.02596		1.83512	0.068112	1.02596
1.55182	0.161248	0.960613		1.55182	0.161248	0.960613
1.50065	0.034267	1.055		1.50065	0.034267	1.055
1.2878	0.015946	1.00574		1.2878	0.015946	1.00574
1.17725	0.129722	1.02399		1.17725	0.129722	1.02399
1.82471	0.496653	0.92624		1.82471	0.496653	0.92624
1.75305	0.122347	1.06258		1.75305	0.122347	1.06258
1.43743	0.308564	0.737034		1.43743	0.308564	0.737034
1.6602	0.046456	1.07846		1.6602	0.046456	1.07846
1.50447	0.331832	0.960042		1.50447	0.331832	0.960042
1.36847	0.042536	0.991625		1.36847	0.042536	0.991625
1.66181	0	0.868821		1.66181	0	0.868821
1.52517	0.021851	0.942504		1.52517	0.021851	0.942504
1.33365	0.03583	1.00134		1.33365	0.03583	1.00134
1.67706	0.039652	1.18099		1.67706	0.039652	1.18099
1.2514	0.029384	0.911637		1.2514	0.029384	0.911637
1.60552	0.731991	0.980412		1.60552	0.731991	0.980412
1.276	0.048442	0.979138		1.276	0.048442	0.979138
1.48883	0	0.8857		1.48883	0	0.8857
1.60627	0.062432	1.17464		1.60627	0.062432	1.17464
1.36959	0.040048	0.86835		1.36959	0.040048	0.86835
1.27114	0.394452	0.91339		1.27114	0.394452	0.91339
0.919392	0.051384	0.773567		0.919392	0.051384	0.773567
1.14019	0.025961	0.94601		1.14019	0.025961	0.94601
1.05956	0	0.956697		1.05956	0	0.956697
1.40824	0	0.77459		1.40824	0	0.77459
1.95765	0.048947	0.879784		1.95765	0.048947	0.879784
1.75626	0.33666	1.07225		1.75626	0.33666	1.07225
1.57334	0.030964	1.06633		1.57334	0.030964	1.06633
