# Supplementary material for: Constitutively active receptor ADGRA3 signaling induces adipose thermogenesis
Source: eLife journal article supplement (doi:10.7554/elife.100205), 2024-08-12
Supplement: fig1-figsupp1-data1 [file Figure 1-figure supplement 1A-Source Data 1.xlsx]

## Sheet: Sheet1
Adgra3
iWAT-NCD	iWAT-HFD	BAT-NCD	BAT-HFD
0.950439	0.686184	2.00926	1.09177
1.03288	0.66281	1.39152	1.09177
1.01866	0.640232	1.71317	1.20303
Ucp1
iWAT-NCD	iWAT-HFD	BAT-NCD	BAT-HFD
0.80478	0.290511	22329.5	16121.1
0.97716	0.33371	19304.7	15464.4
1.27162	0.340722	19574.2	17398.4
