# Supplementary material for: Constitutively active receptor ADGRA3 signaling induces adipose thermogenesis
Source: eLife journal article supplement (doi:10.7554/elife.100205), 2024-08-12
Supplement: fig1-figsupp1-data1 [file Figure 1-figure supplement 1B-Source Data 1.xlsx]

## Sheet: Sheet1
iWAT-CON	iWAT-CL	BAT-CON	BAT-CL
1.22632	1.81798	2.3511	2.43401
1.21532	2.47484	1.59807	3.76418
0.816958	2.16045	2.67647	2.86857
0.741405	1.36541	1.43329	2.39551
	2.10867	1.99216	2.79013
iWAT-CON	iWAT-CL	BAT-CON	BAT-CL
1.30517	40.4207	6350.61	10285.2
0.976519	45.8195	5874.34	7604.72
0.810928	40.4613	6892.35	8583.79
0.907383	47.8374	6091.91	9297.84
	45.254	7124.83	7715.6
