# Supplementary material for: Constitutively active receptor ADGRA3 signaling induces adipose thermogenesis
Source: eLife journal article supplement (doi:10.7554/elife.100205), 2024-08-12
Supplement: fig1-figsupp1-data1 [file Figure 1-figure supplement 1G-Source Data 1.xlsx]

## Sheet: Sheet1
Adgra3
Day 0	Day 4	Day 8	Day 10
0.943784	3.42601	12.698	4.27679
1.09926	2.86102	10.3857	4.81164
0.956959	2.61449	10.1017	5.68251
Ucp1
Day 0	Day 4	Day 8	Day 10
1.05084	9.13589	39.9894	8.76373
1.06551	7.47226	29.2739	8.52408
0.883649	7.31848	28.6715	9.72396
