# Supplementary material for: Constitutively active receptor ADGRA3 signaling induces adipose thermogenesis
Source: eLife journal article supplement (doi:10.7554/elife.100205), 2024-08-12
Supplement: fig1-figsupp1-data1 [file Figure 1-figure supplement 1H-Source Data 1.xlsx]

## Sheet: Sheet1
Adgra3
Day 0	Day 4	Day 8	Day 10
0.701847	3.75608	14.6135	5.61477
1.19684	4.85418	13.6349	5.20258
1.10132	4.16763	13.9214	7.30674
Ucp1
Day 0	Day 4	Day 8	Day 10
0.903748	2.45206	7.3819	3.34961
0.903748	3.74248	5.32947	2.85599
1.1925	3.41999	7.91173	3.84769
