# Supplementary material for: Constitutively active receptor ADGRA3 signaling induces adipose thermogenesis
Source: eLife journal article supplement (doi:10.7554/elife.100205), 2024-08-12
Supplement: fig2-data3 [file elife-100205-fig2-data3-v1.zip]

## Sheet: Sheet1
RO1 signal (RFU)
	shNC + FCCP						shAdgra3 + FCCP							Maximum oxygen consumption rate (%)
0	182388	186728	193499	184715	184781	174413	193505	193336	197422	190136	198597	195435			shNC	shAdgra3
2	184201	231227	243795	228641	216884	179800	214157	220853	228703	204263	181941	227392			104.32	84
4	212988	216766	243963	261784	204329	202403	220783	215137	194791	236518	209630	214466			102.58	83.45
6	198188	166588	242048	218722	189220	188944	205731	200886	200330	156360	186273	163626			103.8	73.25
8	239839	194529	246978	278703	240943	242006	217506	234386	209880	237843	220214	198683			99.39	69.19
10	231482	269832	291046	265718	245579	263309	236257	223244	235474	196193	206879	216994			92.98	69.06
12	225219	219871	271732	268658	235132	235308	235253	204680	197973	205410	171299	161079			96.94	73.37
14	230366	241307	267432	250468	247359	223262	206184	215140	250286	216606	203126	202134
16	275663	282689	319537	228836	283739	244723	223200	219678	234107	237599	214025	204090
18	318202	263295	358907	271124	333329	326889	256685	249095	261102	280037	231237	211785
20	316106	274331	321398	238027	285348	263440	254381	270344	211127	230352	218253	252014
22	332361	266825	382424	317885	293915	263493	251430	277542	218246	208892	208102	235796
24	332311	301368	325358	300072	316250	262334	286846	239608	247447	230877	224126	230098
26	379191	365455	372515	364778	288104	335238	284314	259933	236150	212797	231297	254768
28	395883	325893	341188	307310	313773	278145	297911	316248	265715	221767	222246	236213
30	355990	365802	382552	364742	313855	333287	307872	281554	261901	233480	251730	253009
32	363915	406643	404708	348390	381364	337763	301837	272520	296233	270464	255743	231791
34	365390	363306	376860	331044	325366	354574	320596	301077	258287	242225	227956	237314
36	382501	347989	353510	327585	299836	298974	279510	292284	223146	215453	218009	236653
38	381204	414533	374178	343449	293491	333083	262636	327530	245899	225313	224181	233220
40	417199	367308	356239	372367	327475	347518	303342	295989	239918	239835	247666	261743
42	349640	352332	415402	343274	278015	351980	307966	290042	269502	235233	226335	248291
44	376090	372358	347089	393289	344327	330899	276843	259450	271428	271464	250075	237402
46	380326	359702	317070	320646	332750	350410	283975	315890	263891	242766	232574	289321
48	377460	416096	383757	304981	326718	360822	280230	303591	252604	232261	251976	263774
50	370567	375501	347183	325250	349803	379607	286132	260581	267849	218251	213925	271176
52	376461	399283	366423	323703	355528	342621	286858	297896	211092	232006	250176	253121
54	391156	347795	368523	312703	349370	360423	303228	327235	254738	229798	240321	242081
56	387326	319989	331223	360017	312719	332203	281863	280817	259145	206695	243718	243753
58	360828	329630	360482	335520	326155	374914	279666	293132	230315	227733	238185	251617
60	419290	446416	376443	384345	357791	384549	298417	327036	286085	226129	262323	264507
62	381298	345931	360832	383459	330357	363008	316715	315539	240747	235346	243103	237128
64	373455	396260	369695	404970	325667	318635	303593	307654	232186	212758	222344	263836
66	407463	393923	392768	379532	346745	355422	319368	297204	240643	246781	247658	276083
68	387226	311435	362944	334876	332539	315069	283299	268853	218591	237025	225751	243892
70	349455	394354	347878	341547	301753	324863	312622	260898	215484	218152	231150	241042
72	365871	403050	327267	402070	343281	373388	297918	304353	278282	206019	240369	238672
74	342225	335663	320807	370556	342894	354524	294932	280625	214742	234614	222976	238483
76	349706	305747	368578	397933	331626	364812	298435	308971	281692	226410	246660	265509
78	370261	415746	383474	391985	336913	361516	323191	310122	236107	222364	242629	277714
80	367861	334700	349448	382346	289963	339307	276068	256219	242898	231113	231496	239107
82	405675	356311	364130	355497	301736	365932	286874	271931	224199	217228	232505	247758
84	369209	416755	368636	420553	329742	329719	274568	315532	221297	251601	252138	263803
86	359665	397794	393994	357629	313764	372454	323252	279693	274930	243778	253486	245834
88	368864	375085	350487	349652	399371	359217	296889	278800	296381	236227	244621	278439
90	353740	387219	382825	342805	343117	385244	280869	290179	257624	242230	254508	259106
92	394882	364266	346759	319906	315540	357924	273369	289679	251621	246700	218938	237795
94	383622	394707	355924	359858	331313	394183	310089	291559	265585	259388	240628	247544
96	333286	384904	357266	356198	342800	343809	267322	280624	259324	261948	219475	276153
98	404317	403574	378810	360849	308881	373779	305934	288024	250075	253255	231171	273114
100	394461	347821	319566	316911	349295	358660	305994	293528	203527	201944	233112	257903
102	366292	394790	392532	318276	325721	344466	317670	343085	273989	253346	222931	289977
104	415997	372431	410021	365962	337116	340670	320213	319177	239653	237059	264954	300063
106	360438	383318	367041	369635	345191	357321	319193	306272	260451	241548	223269	276457
108	383695	358254	389971	364421	282947	354956	302062	279512	255773	242516	246928	268952
110	410711	418472	368221	363576	327587	363571	254958	302570	283203	265074	260581	255026
