# Supplementary material for: Constitutively active receptor ADGRA3 signaling induces adipose thermogenesis
Source: eLife journal article supplement (doi:10.7554/elife.100205), 2024-08-12
Supplement: fig2-data3 [file Figure 2A-Source Data 1.xlsx]

## Sheet: Sheet1
Adgra3
shNC	shAdagra3-1	shAdagra3-2	shAdagra3-3
1.00952	0.567097	0.440944	0.571041
1.06191	0.654591	0.424156	0.527655
0.932817	0.660517	0.478194	0.553888
	shNC			shAdgra3-1			shAdgra3-2			shAdgra3-3
Ucp1	0.899221	1.02503	1.22066	0.497027	0.3614	0.40829	0.58304	0.476486	0.481186	0.678616	0.584659	0.500231
Cidea	0.85441	1.21083	0.966606	0.438303	0.289373	0.183901	0.554785	0.226408	0.193983	0.480964	0.398873	0.643049
Cox8b	0.847332	1.01537	1.16231	0.43167	0.322194	0.369335	0.420448	0.314036	0.40388	0.597082	0.402483	0.575146
Ckb	1.03049	1.2573	0.971818	0.596806	0.47281	0.475769	0.492547	0.592273	0.517393	0.420545	0.540862	0.508857
Pparα	0.805897	0.801996	1.54721	1.7108	1.07674	1.40607	0.786036	1.03574	1.30375	1.48521	1.71198	1.11008
Pparγ	1.05385	1.10471	0.858962	0.593231	0.521474	0.44617	0.406314	0.531693	0.41399	0.693355	0.833738	0.605696
Ppargc1α	0.735943	0.829128	1.63883	1.38479	1.0986	0.866737	0.999076	1.13105	0.921251	1.45868	1.85146	1.10547
Hsl	1.05385	0.769326	1.23342	0.168249	0.187462	0.194072	0.170597	0.194207	0.132463	0.591179	0.48858	0.373885
Atgl	0.972968	0.97942	1.06959	0.664718	0.645355	0.720465	0.603383	0.529005	0.529976	1.51152	1.39959	1.21251
