# Supplementary material for: Constitutively active receptor ADGRA3 signaling induces adipose thermogenesis
Source: eLife journal article supplement (doi:10.7554/elife.100205), 2024-08-12
Supplement: fig2-data3 [file Figure 2D-Source Data 1.xlsx]

## Sheet: Sheet1
TG level in 3T3-L1
shNC	shAdagra3-1	shAdagra3-2	shAdagra3-3
0.050952	0.060715	0.062835	0.060313
0.057045	0.068566	0.069736	0.06992
0.05433	0.067926	0.061667	0.064992
