# Supplementary material for: Constitutively active receptor ADGRA3 signaling induces adipose thermogenesis
Source: eLife journal article supplement (doi:10.7554/elife.100205), 2024-08-12
Supplement: fig2-data3 [file Figure 2E-Source Data 1.xlsx]

## Sheet: Sheet1
Glucose uptake in 3T3-L1
shNC	shAdagra3
0.789838	0.24963
1.16593	0.278642
1.08975	0.645746
0.95449	0.796984
