# Supplementary material for: Constitutively active receptor ADGRA3 signaling induces adipose thermogenesis
Source: eLife journal article supplement (doi:10.7554/elife.100205), 2024-08-12
Supplement: fig2-data3 [file Figure 2F-Source Data 1.xlsx]

## Sheet: Sheet1
RO1 signal (RFU)										Basal oxygen consumption rate (%)
Time (min)	shNC				shAdgra3					shNC	shAdgra3
0	110726	123148	127608	130551	114112	129454	111554	102921		98.75	73.91
2	116991	102688	121476	101890	129774	75111	118980	114245		84.39	74.87
4	141064	120624	123213	135315	143909	132390	86455	128869		98.43	81.48
6	179932	160014	129139	130395	182338	89476.5	111606	127269		118.44	84.93
8	121659	93200.5	103810	115993	106853	95074	86741.8	92576.7
10	145708	95252.5	112208	134365	55117	84280	107383	161093
12	165859	130706	128175	145992	129410	87704	103157	189723
14	152453	93967	148636	130510	123289	55801.3	114840	132817
16	163191	124432	141280	118272	94358.3	129305	98450.2	114736
18	158145	118478	152897	127861	111387	98770	73864.5	142795
20	161196	160144	116907	121675	104626	86140	107024	125245
22	197371	116784	133046	153542	128695	139006	118100	148321
24	154163	129070	154921	131608	117860	78635.3	99829.8	135258
26	153830	99266	135240	158216	161487	108825	105341	140315
28	151706	119364	139902	161001	112496	80792.7	109298	129875
30	179964	108838	132891	192125	65898.3	182543	119543	134465
32	127623	131784	108292	215245	101360	154337	109046	164444
34	141793	129424	165164	250280	137673	58564	104406	166850
36	150762	143126	130316	200646	109649	69170	126278	143909
38	207788	143432	180937	225936	147642	204587	108682	133348
40	167685	156588	153310	202628	115469	150198	115198	121870
42	195443	128056	155656	231571	160235	138838	129104	183077
44	143572	100960	109656	210902	107252	59710	99391.5	118544
46	194683	217873	153545	269846	143215	106607	110243	173721
48	165076	134122	151052	273310	160165	184320	107455	139692
50	179650	104159	151677	195330	122555	145705	137889	131928
52	159789	136289	118013	176030	113674	145247	117931	158954
54	152999	135727	132312	217112	65813.3	102167	121346	107284
56	164781	57165.3	163783	213466	113749	123649	157639	155509
58	128946	150467	189248	200756	94914.3	126789	118643	142200
60	181820	200544	208784	255458	143078	65640	155453	157286
62	185107	252311	229793	228304	134179	211107	143802	170907
64	141530	126367	186940	224806	131516	136795	142655	113428
66	159679	155150	203055	216850	133130	129330	165344	144223
68	145859	71484	178198	204192	93643	145228	163284	154002
70	179227	128606	161303	246216	86799	68778	124349	119714
72	164500	83835.3	160186	186154	96650.7	65017.3	170753	142263
74	165559	107618	185741	219419	157665	137150	179092	149495
76	162054	194784	159113	200309	107970	82164	173770	130822
78	163362	253941	245624	285944	144066	184349	197810	142862
80	178853	164701	216068	225030	128186	191971	185113	142368
82	178090	181707	201991	245961	115403	169519	202227	147539
84	152740	161197	208731	210582	118531	72167	176451	143369
86	192762	177592	196158	210690	120636	194727	167869	113652
88	180300	105426	183889	215738	119373	154017	167756	124481
90	162277	192221	207481	208325	116555	132257	174553	171305
92	157878	152967	194360	232116	135506	130012	155858	123970
94	164395	125979	186325	209121	129715	145741	181145	121017
96	181605	177078	228371	216348	149501	174928	182612	147362
