# Supplementary material for: Constitutively active receptor ADGRA3 signaling induces adipose thermogenesis
Source: eLife journal article supplement (doi:10.7554/elife.100205), 2024-08-12
Supplement: fig2-data3 [file Figure 2H-Source Data 1.xlsx]

## Sheet: Sheet1
Adgra3			Ucp1
CON	Adagra3 OE		CON	Adagra3 OE
0.45398	473400		1.52412	1.99719
0.715836	453173		1.04897	1.57568
0.875817	364283		0.419277	1.41419
1.95437	331053		1.00764	1.41223
	368346			1.66206
