# Supplementary material for: Constitutively active receptor ADGRA3 signaling induces adipose thermogenesis
Source: eLife journal article supplement (doi:10.7554/elife.100205), 2024-08-12
Supplement: fig2-data3 [file Figure 2K-Source Data 1.xlsx]

## Sheet: Sheet1
TG level in 3T3-L1
CON	Adagra3 OE
0.646158	0.587921
0.602168	0.58052
0.654358	0.604613
0.609522	0.594984
