# Supplementary material for: Constitutively active receptor ADGRA3 signaling induces adipose thermogenesis
Source: eLife journal article supplement (doi:10.7554/elife.100205), 2024-08-12
Supplement: fig2-data3 [file Figure 2L-Source Data 1.xlsx]

## Sheet: Sheet1
Glucose uptake in 3T3-L1
CON	Adgra3 OE
0.821424	1.94273
0.814564	1.79316
0.933063	1.73463
1.43095	1.90424
