# Supplementary material for: Constitutively active receptor ADGRA3 signaling induces adipose thermogenesis
Source: eLife journal article supplement (doi:10.7554/elife.100205), 2024-08-12
Supplement: fig2-data3 [file Figure 2M-Source Data 1.xlsx]

## Sheet: Sheet1
RO1 signal (RFU)										Basal oxygen consumption rate (%)
Time (min)	CON				Adgra3 OE					CON	Adgra3 OE
0	146216	155631	148195	146421	146550	152684	144293	138467		106.59	125.15
2	163988	208893	166292	184548	193529	194908	150013	173881		99.41	116.98
4	168599	59424	158085	153012	169182	164446	142344	169604		91.01	128.76
6	173945	139866	142046	155371	230916	162808	235184	159631		102.98	126.79
8	182512	180824	169721	179354	168841	232800	284996	221628
10	169159	181421	172443	134469	179756	224491	151163	201365
12	160682	236053	152822	150541	139828	168334	204314	191012
14	193576	247808	166835	183732	171974	200189	202073	230274
16	169279	196857	166670	206453	271532	217264	206014	223826
18	156980	196673	152806	179983	238861	200080	249455	189117
20	171088	195474	167787	213898	192069	204528	226902	229077
22	221810	155348	190946	202822	218533	182896	196070	241366
24	207517	198098	190647	184090	229561	206643	249445	216987
26	218239	186835	192304	189003	260521	173321	221766	215856
28	204905	253547	166954	209663	212091	204328	249518	246645
30	176680	163113	201341	218570	270831	230866	307652	250614
32	209014	211641	198415	220889	283591	289400	298046	280192
34	205835	163799	161100	201329	237744	186092	245399	260413
36	190450	184204	171885	219299	239368	220421	207571	249293
38	220451	233002	175468	182084	301981	220336	253158	230054
40	238906	204321	164211	226408	266859	288838	330719	240664
42	202300	142716	164401	204635	210868	249763	272612	222002
44	192887	242262	187623	209749	238581	232555	245383	239123
46	185446	138608	133353	185754	281967	142963	244847	246973
48	252325	251383	212231	228833	292654	289231	337287	285965
50	237270	194136	180246	194482	269453	258150	318356	241358
52	229148	193523	157564	205474	237241	251993	223331	246119
54	216688	168783	170601	192402	201687	215315	163892	241468
56	207011	138367	165237	218381	292426	196479	234464	228399
58	193425	192553	146647	186523	232446	251249	208036	235846
60	189000	222049	175722	163306	250965	246938	222409	280278
62	197932	200608	177008	221199	221097	204782	294147	274503
64	226645	274591	169554	232397	263409	230012	308558	274873
66	204892	149317	182052	197442	230732	279020	188897	240216
68	233889	188982	212675	210105	246718	190067	232438	264447
70	202529	163946	160110	198738	275927	237067	274377	236343
72	180435	102978	191710	141426	213071	243458	222921	259567
74	208104	219651	148488	165178	263754	174011	221880	254239
76	219665	168646	162674	206847	179515	177851	242909	265219
78	170831	173396	156778	157862	212141	217046	234167	233306
80	208995	212423	186344	213836	277033	236690	349652	252712
82	255862	301831	186690	198406	271105	244755	302358	266642
84	188535	125595	164460	231117	238837	223516	274507	226139
86	227680	207217	191503	200567	275410	251724	273660	257662
88	167648	103956	168035	201166	198512	254251	236748	251835
90	185223	232754	165462	216461	227125	261147	234019	260459
92	222473	143609	181146	194251	227572	262862	254784	281966
94	194288	208285	144597	167109	291612	227591	195492	277886
96	206964	95882.7	150236	155528	251852	186636	198758	213147
98	235225	208898	162588	213767	235445	203976	304025	267909
