# Supplementary material for: Constitutively active receptor ADGRA3 signaling induces adipose thermogenesis
Source: eLife journal article supplement (doi:10.7554/elife.100205), 2024-08-12
Supplement: fig2-data3 [file Figure 2N-Source Data 1.xlsx]

## Sheet: Sheet1
RO1 signal (RFU)
														Maximum oxygen consumption rate (%)
	CON + FCCP					Adgra3 OE +FCCP									CON	Adgra3 OE
0	169206	172843	167443	171671	190152	177343	175359	200261	180410	186681					105.46	115.92
2	189620	100215	269806	185129	178281	175450	209129	209726	186653	239302					97.64	119.62
4	214190	143194	195939	198195	207652	175195	249248	214097	217706	209080					94.11	126.13
6	215140	224818	257582	176841	185398	203388	247065	221098	215053	229320					97.11	112.25
8	133856	175748	195691	187270	197085	212335	207623	190750	212302	193602					105.68	121.46
10	230898	225138	255404	194384	209895	195934	197870	224738	221655	211294
12	174119	259823	212187	177383	211315	203337	240601	194844	192265	201235
14	256372	234956	177460	201973	202512	202518	213006	283016	247599	215268
16	210289	231761	227069	195071	205515	202379	190030	195095	186794	215534
18	290071	188749	211477	182857	208008	238732	197015	248344	250199	243820
20	248559	246169	220363	195897	210862	228986	269521	277629	217350	223856
22	239478	216320	184471	178481	211212	218435	206627	264150	230026	192770
24	195065	162315	209384	174914	195050	226670	185120	241814	194705	201316
26	237507	170835	192695	175199	191565	223437	225421	252295	228362	248063
28	274324	205484	230255	191008	213536	250169	256752	236483	210868	234677
30	283892	148228	172645	192913	201768	231992	259733	236682	232589	236955
32	196605	264377	142725	193704	231781	221613	179286	226107	221720	231919
34	251691	157737	113100	181759	202137	259723	227495	225869	240659	224288
36	282081	182251	166622	199436	207851	231238	210095	241533	200689	245985
38	239597	216531	138358	184057	166996	223687	226775	179270	209467	243453
40	239261	142137	161910	190022	218903	223098	214989	273148	227550	197016
42	249579	200597	92727.1	183503	182697	214167	222628	278398	232697	270221
44	172635	182711	183225	178216	186678	221309	189021	268267	197404	229693
46	194001	90966.7	134038	182819	198967	233047	255122	232476	217237	228741
48	318401	223433	196389	198354	223710	249419	265481	297315	247274	258252
50	188423	162379	194199	206690	223604	231472	231785	217226	212232	247058
52	208064	191642	156472	198726	204282	219881	229285	256199	176695	240446
54	212093	252341	162855	190311	216227	233184	291366	274887	203149	258696
56	161482	127335	127340	169414	197398	232653	180953	233774	176592	190625
58	158404	188231	81133.7	161771	191265	204392	261777	253293	209528	270629
60	194502	235509	176874	187835	197042	235444	231068	243349	198724	245971
62	155238	187009	120904	182304	196954	189019	266904	249456	238894	252724
64	209938	208780	172162	206419	214218	263135	278359	262692	226971	283499
66	160103	154373	178596	171394	217678	223580	236580	243198	202347	241240
68	164037	113747	190220	178500	233049	250784	144824	247051	214822	221881
70	162887	151455	163679	211405	220410	226463	264876	290872	209205	253697
72	179145	252990	217147	177232	202584	228246	236637	263197	229544	234282
74	202008	178065	161608	185306	217121	222104	238327	264682	218834	244512
76	165506	173893	162243	197748	205711	196885	227264	256479	249107	308080
78	127673	217797	155006	169587	208045	256093	244675	251687	213740	238298
80	179743	117280	146674	193059	200638	241754	258484	221538	179267	231095
82	147272	264215	210607	193474	212942	240632	195336	253077	255234	209650
84	157524	79712.7	223881	183866	177969	203838	258262	238669	212884	235901
86	179247	264195	199246	204552	225813	243708	245710	231669	238240	225510
88	173570	142573	161943	170124	186851	228483	230945	239938	188296	228948
90	170111	173103	255053	204771	211439	245640	232553	258108	237201	255061
92	208735	214813	199148	187238	227403	237501	268980	255093	234530	247247
94	199325	167287	247777	207932	191709	252635	228564	245361	245469	243643
96	228519	199260	154200	189986	211045	232677	282319	260533	237251	257360
98	211050	268847	184888	202344	201869	240522	295276	287258	240439	282440
