# Supplementary material for: Constitutively active receptor ADGRA3 signaling induces adipose thermogenesis
Source: eLife journal article supplement (doi:10.7554/elife.100205), 2024-08-12
Supplement: fig3-data3 [file elife-100205-fig3-data3-v1.zip]

## Sheet: Sheet1
Adgra3
NCD-shNC	NCD-shAdgra3
0.926846	0.542766
1.32354	0.648151
0.745562	0.485452
0.996817	0.436
1.00724	0.788619
	NCD-shNC					NCD-shAdgra3
Ucp-1	1.25501	1.19557	0.59201	0.823988	1.13343	0.634061	0.880683	0.378586	0.164447	0.332101
Cidea	1.14369	1.25936	0.875812	0.96239	0.758748	0.6398	0.712861	0.529864	0.163198	0.26975
Cox8b	1.12027	1.15978	0.943337	0.742182	1.03444	0.743212	0.666578	0.663811	0.322159	0.579888
Ckb	1.12917	1.34375	0.890237	0.764327	0.872521	0.479054	0.88962	0.620826	0.663543	0.7186
Pparα	1.2342	1.29287	0.960977	0.533505	0.978453	0.63094	0.645986	0.554237	0.141079	0.324564
Pparγ	0.746041	1.21953	0.816954	0.939085	1.27839	0.703356	0.510976	0.575276	0.798479	0.498383
Atgl	0.966282	1.34492	0.952978	0.657706	1.07812	0.743557	0.954962	0.633104	0.322085	0.554598
Hsl	1.14384	0.880802	1.01881	0.866871	1.08967	0.463259	0.879582	0.901807	0.68439	0.825815
