# Supplementary material for: Constitutively active receptor ADGRA3 signaling induces adipose thermogenesis
Source: eLife journal article supplement (doi:10.7554/elife.100205), 2024-08-12
Supplement: fig3-data3 [file Figure 3B-Source Data 1.xlsx]

## Sheet: Sheet1
	NCD-shNC					NCD-shAdgra3
0	23.08	21.64	24.43	24.29	24.35	23.68	24.63	22.77	24.03	24.54
4	23.66	21.81	25.05	24.78	24.8	24.46	25.25	23.75	24.61	25.71
8	24.76	22.93	25.8	25.2	26.5	24.68	25.4	24.1	25.44	26.2
12	23.75	23.35	25.3	25.25	26.98	25.9	26.65	25.1	26.2	27
16	25.05	23.12	25.18	24.47	25.48	26.14	26.61	25.18	25.96	26.68
20	25.37	23.7	25.84	25.39	26.6	27.03	27.02	26.43	26.94	27.32
24	25.98	24.24	25.98	25.4	26.54	27.13	27.08	26.49	27.88	28.08
28	26.1	24.6	25.99	25.78	27.24	27.68	27.89	26.7	28.23	28.09
