# Supplementary material for: Constitutively active receptor ADGRA3 signaling induces adipose thermogenesis
Source: eLife journal article supplement (doi:10.7554/elife.100205), 2024-08-12
Supplement: fig3-data3 [file Figure 3C-Source Data 1.xlsx]

## Sheet: Sheet1
iWAT			eWAT			BAT			Liver
NCD-shNC	NCD-shAdgra3		NCD-shNC	NCD-shAdgra3		NCD-shNC	NCD-shAdgra3		NCD-shNC	NCD-shAdgra3
0.235	0.26		0.286	0.334		0.21	0.249		1.154	1.211
0.17	0.267		0.294	0.352		0.114	0.211		1.089	1.138
0.233	0.296		0.32	0.356		0.158	0.305		1.032	1.124
0.224	0.381		0.31	0.389		0.19	0.287		1.096	1.339
0.209	0.307		0.33	0.402		0.161	0.266		1.18	1.141
