# Supplementary material for: Constitutively active receptor ADGRA3 signaling induces adipose thermogenesis
Source: eLife journal article supplement (doi:10.7554/elife.100205), 2024-08-12
Supplement: fig3-data3 [file Figure 3D-Source Data 1.xlsx]

## Sheet: Sheet1
NCD-shNC	NCD-shAdgra3
36.3	36
36.1	35.9
36.2	36
36.2	35.8
36	35.9
