# Supplementary material for: Constitutively active receptor ADGRA3 signaling induces adipose thermogenesis
Source: eLife journal article supplement (doi:10.7554/elife.100205), 2024-08-12
Supplement: fig3-data3 [file Figure 3E-Source Data 2.xlsx]

## Sheet: Sheet1
NCD-shNC	NCD-shAdgra3
37.5	37.1
37.3	36.6
37.2	36.6
37.2	35.8
37.4	36.5
