# Supplementary material for: Constitutively active receptor ADGRA3 signaling induces adipose thermogenesis
Source: eLife journal article supplement (doi:10.7554/elife.100205), 2024-08-12
Supplement: fig3-data3 [file Figure 3F-Source Data 1.xlsx]

## Sheet: Sheet1
Adgra3
NCD-shNC	NCD-shAdgra3
0.946498	0.561622
0.872164	0.573423
1.10242	0.788767
0.801998	0.660061
1.27692	0.788767
	NCD-shNC					NCD-shAdgra3
Ucp-1	0.896254	0.740709	1.58995	1.15667	0.616417	0.171108	0.173617	0.139465	0.319078	0.293205
Cidea	0.569556	1.54318	0.957875	0.982077	0.94731	0.16619	0.170153	0.472344	0.375506	0.265155
Cox8b	1.25735	0.744005	0.842287	0.872594	1.28377	0.188467	0.22694	0.947622	0.50817	0.789156
Ckb	1.14018	0.760626	1.05648	1.03977	1.00296	0.467247	0.509184	0.769108	0.634309	0.772849
Pparα	1.02453	1.12737	1.0526	0.851431	0.944067	0.505913	0.790568	0.62675	0.592941	0.677814
Pparγ	1.05927	0.855048	0.712063	1.18269	1.19092	0.506304	0.937621	0.648454	0.755277	0.537403
Atgl	0.878352	1.26039	0.682959	0.959843	1.2842	0.647913	0.342428	0.653777	0.749433	0.914383
Hsl	1.40372	1.0594	0.677482	0.834656	1.02474	0.655312	0.433245	0.66354	0.852785	0.731158
