# Supplementary material for: Constitutively active receptor ADGRA3 signaling induces adipose thermogenesis
Source: eLife journal article supplement (doi:10.7554/elife.100205), 2024-08-12
Supplement: fig3-data3 [file Figure 3L-Source Data 1.xlsx]

## Sheet: Sheet1
	NCD-shNC					NCD-shAdgra3
0	4.3	4.8	6.9	3.5	8.4	9.7	9.9	5.1	4.4	5.2
15	22.4	23.8	23.2	21.9	25.4	27.4	27.4	22.5	26.7	25.6
30	16.7	13.2	18.4	10.6	17.3	25.4	26.4	19.5	20.2	22
60	12	10.2	15.5	9.1	11.3	23	20.2	12.9	15.8	12.7
90	4.9	8.5	8.3	6.8	7.7	16.6	11.4	9.7	11.5	10.6
120	2.7	4.7	6.2	4.3	9.2	10.2	10.3	6	5.7	5.6
	NCD-shNC	NCD-shAdgra3
	1291.5	2396.25
	1321.5	2181.75
	1620.75	1582.5
	1134.75	1792.5
	1541.25	1701
