# Supplementary material for: Constitutively active receptor ADGRA3 signaling induces adipose thermogenesis
Source: eLife journal article supplement (doi:10.7554/elife.100205), 2024-08-12
Supplement: fig3-data3 [file Figure 3M-Source Data 1.xlsx]

## Sheet: Sheet1
	NCD-shNC					NCD-shAdgra3
0	6.8	6.9	4.9	6.7	6.2	7.3	12.1	10.8	7.5	8.3
15	3	1.9	3	4.3	4	3.3	5.3	5.6	4.5	7.1
30	3	3.7	1.4	3.5	2.9	2.2	6.1	6.9	4.4	5.1
60	4.2	4.1	3.5	4.3	3.7	5.3	8.8	8.2	4.2	6.9
90	5.5	6.1	4.2	4.9	4.6	5	8.4	8.6	4.7	7.6
120	5.5	7.4	4.9	5.6	5.5	6	8.8	8.8	5.9	8.3
	NCD-shNC	NCD-shAdgra3
	537	552.75
	580.5	874.5
	417.75	978.75
	553	578.25
	489.75	843
