# Supplementary material for: Constitutively active receptor ADGRA3 signaling induces adipose thermogenesis
Source: eLife journal article supplement (doi:10.7554/elife.100205), 2024-08-12
Supplement: fig3-data3 [file Figure 3N-Source Data 1.xlsx]

## Sheet: Sheet1
NCD-shNC	NCD-shAdgra3
3.90742	5.6022
4.99692	5.23903
4.39164	5.36008
4.75481	5.23903
4.99692	5.48114
