# Supplementary material for: Constitutively active receptor ADGRA3 signaling induces adipose thermogenesis
Source: eLife journal article supplement (doi:10.7554/elife.100205), 2024-08-12
Supplement: fig3-data3 [file Figure 3O-Source Data 1.xlsx]

## Sheet: Sheet1
NCD-shNC	NCD-shAdgra3
1.28511	1.56861
1.19926	1.62992
1.05399	2.45373
1.12002	1.79291
1.33251	2.36298
