# Supplementary material for: Constitutively active receptor ADGRA3 signaling induces adipose thermogenesis
Source: eLife journal article supplement (doi:10.7554/elife.100205), 2024-08-12
Supplement: fig3-figsupp1-data1 [file elife-100205-fig3-figsupp1-data1-v1.zip]

## Sheet: Sheet1
Adgra3
Left-shNC	Right-shAdgra3
1.03059	0.262493
0.895663	0.355206
1.02016	0.586583
1.05359	0.377087
	Left-shNC				Right-shAdgra3
Ucp-1	0.995695	1.19441	0.845575	0.964321	0.187406	0.235119	0.473797	0.138424
Cidea	0.990209	1.32806	0.798401	0.883325	0.324945	0.345975	0.710052	0.316357
Cox8b	0.715013	0.850848	1.17794	1.2562	0.428252	0.468096	0.72317	0.399719
Ckb	0.829775	1.34939	1.05425	0.766582	0.529159	0.378949	0.817468	0.474253
Pparα	0.768091	0.80586	1.05974	1.36631	0.24502	0.634569	0.437304	0.227323
Pparγ	0.772247	0.921927	1.07459	1.23124	0.514389	0.962227	0.550514	0.654994
Atgl	0.945294	0.836048	1.32014	0.898522	0.47165	0.469423	0.722572	0.36627
Hsl	0.984688	1.18679	0.939415	0.889104	0.439658	0.609633	0.470018	0.145125
