# Supplementary material for: Constitutively active receptor ADGRA3 signaling induces adipose thermogenesis
Source: eLife journal article supplement (doi:10.7554/elife.100205), 2024-08-12
Supplement: fig3-figsupp1-data1 [file Figure 3-figure supplement 1A-Source Data 1.xlsx]

## Sheet: Sheet1
	NCD-shNC				NCD-shAdgra3
iWAT	1.24909	0.880421	0.887327	0.983162	0.213179	0.238606	0.181501	0.226029
BAT	1.0122	0.99778	1.08347	0.906549	0.299432	0.332606	0.290238	0.294776
Heart	0.991056	1.06713	0.975118	0.966696	0.899872	1.30553	0.897913	0.923772
Liver	1.0033	1.05117	1.00805	0.937475	0.511504	0.48857	0.478851	0.490494
Spleen	0.840707	0.901031	1.00868	1.24959	0.777232	1.30528	0.919864	1.52825
