# Supplementary material for: Constitutively active receptor ADGRA3 signaling induces adipose thermogenesis
Source: eLife journal article supplement (doi:10.7554/elife.100205), 2024-08-12
Supplement: fig3-figsupp1-data1 [file Figure 3-figure supplement 1B-Source Data 1.xlsx]

## Sheet: Sheet1
	NCD-shNC				NCD-shAdgra3
Lung	1.02972	0.952152	1.02803	0.990099	1.10409	1.17013	1.18944	0.573162
Kidney	0.954455	1.02699	0.971333	1.04723	0.857866	1.30236	0.599436	0.581419
Stomach	0.95883	0.995705	1.04539	1.00008	1.30738	0.971759	0.846806	0.94407
Muscle	0.77691	1.11027	1.08692	1.0259	0.518837	0.688085	0.701562	0.633932
Brain	0.906894	1.02469	1.08989	0.978521	0.727308	1.45973	0.784088	0.782626
