# Supplementary material for: Constitutively active receptor ADGRA3 signaling induces adipose thermogenesis
Source: eLife journal article supplement (doi:10.7554/elife.100205), 2024-08-12
Supplement: fig3-figsupp1-data1 [file Figure 3-figure supplement 1C-Source Data 1.xlsx]

## Sheet: Sheet1
NCD-shNC	NCD-shAdgra3
3.37	3.53
3.53	3.67
3.2	3.43
3.46	3.61
