# Supplementary material for: Constitutively active receptor ADGRA3 signaling induces adipose thermogenesis
Source: eLife journal article supplement (doi:10.7554/elife.100205), 2024-08-12
Supplement: fig3-figsupp1-data1 [file Figure 3-figure supplement 1D-Source Data 1.xlsx]

## Sheet: Sheet1
NCD-shNC	NCD-shAdgra3
0.883556	0.896
0.908444	0.920889
0.920889	1.08267
0.846222	1.18222
0.759111	1.10756
