# Supplementary material for: Constitutively active receptor ADGRA3 signaling induces adipose thermogenesis
Source: eLife journal article supplement (doi:10.7554/elife.100205), 2024-08-12
Supplement: fig3-figsupp1-data1 [file Figure 3-figure supplement 1E-Source Data 1.xlsx]

## Sheet: Sheet1
NCD-shNC	NCD-shAdgra3
0.142649	0.141097
0.160135	0.121472
0.0897462	0.0976963
0.0816596	0.0865458
0.0803871	0.105777
