# Supplementary material for: Constitutively active receptor ADGRA3 signaling induces adipose thermogenesis
Source: eLife journal article supplement (doi:10.7554/elife.100205), 2024-08-12
Supplement: fig4-data3 [file elife-100205-fig4-data3-v1.zip]

## Sheet: Sheet1
	HFD-CON						HFD-Adgra3 OE
0	22.8	23.7	23.7	25.4	23.8	22.9	23.9	22.8	24.3	23.1	24.2	24
1	25.1	26	25	28	26	25.8	25.8	24.6	25.7	24.5	25.6	26.8
2	25.7	27	26.1	29.3	27	26.9	26.2	25.6	26.4	25.6	25.5	27.6
3	27.1	27.5	26.7	30.1	28	27.8	27.5	26.8	26.8	26.8	26.2	28.5
4	27.1	28.1	27	30.9	28.5	28.5	27.5	27.3	27.1	27.5	26.6	29.1
5	27.8	29.3	28.3	32.3	29.8	29	28.3	28.9	27.8	28.4	26.8	29.9
6	28.6	30	29.6	33.6	30.9	29.6	29	30	28.7	29.4	27.5	31.8
7	30.7	30.8	30	34.5	31.8	30.3	29.7	30.6	29.2	30.2	28.5	32.2
8	30.4	32.2	30.5	35.5	33.2	30.9	30.3	31.2	29.7	30.6	30	32.6
9	31.6	33.4	31.8	36.4	34.5	32.5	30.2	31.4	30.8	31.3	29.8	33.7
10	31.7	34.2	31.8	38.8	35.5	32.9	31.3	32.8	31.5	31.9	30.9	35.4
11	32.4	36.7	32.6	40.6	37.7	34.6	32.2	32.9	31.7	32.5	31.5	35.8
12	33.2	39.4	34.2	43.5	40.2	36.7	33.6	33.5	32.3	31.9	31.2	34.3
