# Supplementary material for: Constitutively active receptor ADGRA3 signaling induces adipose thermogenesis
Source: eLife journal article supplement (doi:10.7554/elife.100205), 2024-08-12
Supplement: fig4-data3 [file Figure 4C-Source Data 1.xlsx]

## Sheet: Sheet1
iWAT			eWAT
HFD-CON	HFD-Adgra3 OE		HFD-CON	HFD-Adgra3 OE
0.497	0.603		0.8	0.716
0.797	0.502		1.854	0.598
0.47	0.516		1.105	0.828
0.97	0.317		2.387	0.553
0.809	0.405		1.95	0.593
0.574	0.471		1.376	0.795
BAT			Liver
HFD-CON	HFD-Adgra3 OE		HFD-CON	HFD-Adgra3 OE
0.231	0.3		1.103	1.143
0.48	0.257		1.22	1.157
0.263	0.256		1.127	1.109
0.522	0.172		1.485	1.141
0.377	0.245		1.348	1.033
0.32	0.243		1.242	1.016
