# Supplementary material for: Constitutively active receptor ADGRA3 signaling induces adipose thermogenesis
Source: eLife journal article supplement (doi:10.7554/elife.100205), 2024-08-12
Supplement: fig4-data3 [file Figure 4D-Source Data 1.xlsx]

## Sheet: Sheet1
HFD-CON	HFD-Adgra3 OE
35.7	36.1
35.6	35.8
35.7	35.9
35.7	35.9
35.5	35.8
35.6	36.1
