# Supplementary material for: Constitutively active receptor ADGRA3 signaling induces adipose thermogenesis
Source: eLife journal article supplement (doi:10.7554/elife.100205), 2024-08-12
Supplement: fig4-data3 [file Figure 4F-Source Data 1.xlsx]

## Sheet: Sheet1
Adgra3
HFD-CON	HFD-Adgra3OE
1.38576	108.99
0.824943	85.8225
0.789294	45.7535
	HFD-CON			HFD-Adgra3 OE
Ucp-1	1.45445	0.62682	0.918734	6.50126	6.39369	4.23179
Cidea	0.777898	1.16298	1.05913	2.03459	1.97239	1.55544
Cox8b	1.06834	0.963907	0.967751	2.09089	1.72181	2.80027
Ckb	1.16163	0.927241	0.911127	2.37784	2.01212	1.34775
Atgl	0.782134	1.23387	0.983993	1.62106	1.53083	1.44919
Hsl	0.882888	0.998415	1.1187	2.52601	1.7126	1.569
