# Supplementary material for: Constitutively active receptor ADGRA3 signaling induces adipose thermogenesis
Source: eLife journal article supplement (doi:10.7554/elife.100205), 2024-08-12
Supplement: fig4-data3 [file Figure 4G-Source Data 1.xlsx]

## Sheet: Sheet1
Adgra3
HFD-CON	HFD-Adgra3OE
1.24141	29.9723
0.339048	77.7765
1.41954	84.2329
	HFD-CON			HFD-Adgra3 OE
Ucp-1	1.57486	0.586193	0.838948	2.15621	2.46428	2.85448
Cidea	1.17572	0.263281	1.561	2.45169	2.7227	3.65982
Cox8b	1.12511	0.551465	1.32343	2.01682	2.71306	3.05899
Ckb	1.2104	0.536735	1.25286	3.38848	3.05999	4.77818
Atgl	1.15806	0.322451	1.51948	2.26158	2.77505	3.11153
Hsl	1.33638	0.387434	1.27618	2.30657	2.01326	2.81729
