# Supplementary material for: Constitutively active receptor ADGRA3 signaling induces adipose thermogenesis
Source: eLife journal article supplement (doi:10.7554/elife.100205), 2024-08-12
Supplement: fig4-data3 [file Figure 4L-Source Data 1.xlsx]

## Sheet: Sheet1
HFD-CON	HFD-Adgra3 OE
1596	1052.25
1458	1122
1409.25	1138.5
1399.5	1117.5
1534.5	1082.25
1554.75	1312.5
	HFD-CON						HFD-Adgra3 OE
0	7.4	8.2	9.1	9.7	8.4	8.2	6.4	4.4	5	4.9	5.9	6
15	19.9	23.4	16.8	26.2	16	20.2	16.4	17.7	14.5	13.9	15.8	16.4
30	14.8	14	15.4	15.5	15.6	19.5	11.5	9.2	12.6	12.1	11.6	14.8
60	14.9	10.5	11.9	8.8	14.1	13	7.4	9.5	9.9	9.4	8.8	12.2
90	10.9	9.7	9.3	7.8	10.2	7.9	7.2	7.9	7.4	8	6.1	7.9
120	9	8.3	7.1	5.8	10.1	8.3	4.1	6.3	5.4	5.2	6.2	5.7
