# Supplementary material for: Constitutively active receptor ADGRA3 signaling induces adipose thermogenesis
Source: eLife journal article supplement (doi:10.7554/elife.100205), 2024-08-12
Supplement: fig4-data3 [file Figure 4M-Source Data 1.xlsx]

## Sheet: Sheet1
HFD-CON	HFD-Adgra3 OE
708.75	654
831.75	488.25
706.5	597
626.25	464.25
782.25	503.25
977.25	519
	HFD-CON						HFD-Adgra3 OE
0	10.5	12.8	11.1	11.8	14.3	17.8	11.8	12.1	11	10.9	10.8	12.1
15	6	5.5	6.4	6.3	6.7	7.9	4.1	4.4	4.9	3.6	3.5	4.5
30	3.8	6.1	5.3	4.5	5.4	6.9	3.6	3.6	4.6	2.6	3.1	2.9
60	5	7.1	4.5	3	5.1	6.3	5.7	2.4	3.3	3.9	3.9	1.8
90	6.8	6.9	5.5	4.9	5.7	7.1	4.8	3.5	4.2	3.5	3.5	6.1
120	6.7	6.4	7.2	7	8.6	11.2	7.2	4.9	7.5	3.2	5.2	3.9
