# Supplementary material for: Constitutively active receptor ADGRA3 signaling induces adipose thermogenesis
Source: eLife journal article supplement (doi:10.7554/elife.100205), 2024-08-12
Supplement: fig4-data3 [file Figure 4N-Source Data 1.xlsx]

## Sheet: Sheet1
HFD-CON	HFD-Adgra3 OE
5.09418	4.09721
4.55735	4.1739
4.09721	4.05886
4.05886	3.407
4.02052	3.90549
4.36562	3.71376
