# Supplementary material for: Constitutively active receptor ADGRA3 signaling induces adipose thermogenesis
Source: eLife journal article supplement (doi:10.7554/elife.100205), 2024-08-12
Supplement: fig4-figsupp1-data3 [file elife-100205-fig4-figsupp1-data3-v1.zip]

## Sheet: Sheet1
Adgra3
NCD-CON	NCD-Adgra3 OE
0.69823	8.16116
0.914956	9.53858
1.38681	8.17815
	NCD-WT-CON			NCD-WT-Adgra3OE
Ucp-1	0.889147	0.612378	1.49848	1.84484	3.56399	4.00692
Cidea	0.651838	1.38183	0.966328	2.03296	2.97643	2.34337
Cox8b	0.790932	0.571421	1.63765	2.396	2.67701	2.73326
Ckb	0.705441	1.13257	1.16199	1.53858	2.93345	2.63645
Pparα	1.97967	0.686943	0.333385	2.7958	3.20486	3.36653
Pparγ	1.06806	0.633313	1.29863	5.49451	6.54771	4.83994
Atgl	1.33102	0.545075	1.12391	4.12252	3.17229	3.47142
Hsl	1.0974	0.494173	1.40843	3.06118	2.00012	2.81296
