# Supplementary material for: Constitutively active receptor ADGRA3 signaling induces adipose thermogenesis
Source: eLife journal article supplement (doi:10.7554/elife.100205), 2024-08-12
Supplement: fig4-figsupp1-data3 [file Figure 4-figure supplement 1B-Source Data 1.xlsx]

## Sheet: Sheet1
	NCD-CON				NCD-Adgra3 OE
iWAT	0.94496	1.08623	0.983724	0.985089	3.59583	3.77984	3.73039	3.36435
BAT	0.928226	1.11694	0.976402	0.978435	3.59888	3.82258	3.53951	3.61137
Heart	0.984027	1.12332	0.974524	0.918129	2.4773	2.99129	2.428	2.43812
Liver	1.02917	1.05007	0.976357	0.944407	6.35759	6.01048	5.91952	5.63525
Spleen	1.16481	1.08681	0.924727	0.823648	1.83668	3.56055	3.32672	4.21666
