# Supplementary material for: Constitutively active receptor ADGRA3 signaling induces adipose thermogenesis
Source: eLife journal article supplement (doi:10.7554/elife.100205), 2024-08-12
Supplement: fig4-figsupp1-data3 [file Figure 4-figure supplement 1C-Source Data 1.xlsx]

## Sheet: Sheet1
	NCD-CON				NCD-Adgra3 OE
Lung	0.951027	1.0789	0.968993	1.00108	0.94315	0.771939	1.18884	1.10233
Kidney	1.00087	1.07792	0.991889	0.929322	2.71556	3.32246	3.45635	2.69868
Stomach	1.08002	0.967313	1.06441	0.88826	2.47093	2.77032	3.06748	2.47607
Muscle	1.00228	1.06458	0.937103	0.996043	3.17835	2.59418	2.84471	3.35725
Brain	0.921223	0.959013	1.13652	0.983245	1.19302	1.09553	1.48929	1.47593
