# Supplementary material for: Constitutively active receptor ADGRA3 signaling induces adipose thermogenesis
Source: eLife journal article supplement (doi:10.7554/elife.100205), 2024-08-12
Supplement: fig4-figsupp1-data3 [file Figure 4-figure supplement 1D-Source Data 1.xlsx]

## Sheet: Sheet1
NCD-CON	NCD-Adgra3 OE
35.4333	35.8333
35.3	36.4333
35.3333	35.75
35.5	36.12
35.2	35.58
