# Supplementary material for: Constitutively active receptor ADGRA3 signaling induces adipose thermogenesis
Source: eLife journal article supplement (doi:10.7554/elife.100205), 2024-08-12
Supplement: fig4-figsupp1-data3 [file Figure 4-figure supplement 1E-Source Data 2.xlsx]

## Sheet: Sheet1
NCD-WT-CON	NCD-WT-Adgra3 OE
34.9	35.7
34.7	35.5
35	35.4
34.8	35.5
35.2	35.2
