# Supplementary material for: Constitutively active receptor ADGRA3 signaling induces adipose thermogenesis
Source: eLife journal article supplement (doi:10.7554/elife.100205), 2024-08-12
Supplement: fig4-figsupp1-data3 [file Figure 4-figure supplement 1F-Source Data 1.xlsx]

## Sheet: Sheet1
NCD-CON	NCD-Adgra3 OE
15.0278	10.318
16.8633	10.5313
12.5473	17.0705
10.2498	11.5257
13.9333	13.5895
