# Supplementary material for: Constitutively active receptor ADGRA3 signaling induces adipose thermogenesis
Source: eLife journal article supplement (doi:10.7554/elife.100205), 2024-08-12
Supplement: fig4-figsupp1-data3 [file Figure 4-figure supplement 1I-Source Data 1.xlsx]

## Sheet: Sheet1
Adgra3
NCD-CON	NCD-Adgra3 OE
0.855225	4.48583
1.20696	5.63875
0.937816	7.4507
	NCD-WT-CON			NCD-WT-Adgra3OE
Ucp-1	0.915724	1.10419	0.980089	2.27519	1.42601	1.7605
Cidea	1.0849	1.13726	0.777847	2.19247	1.74661	1.42658
Cox8b	0.968827	1.01418	1.01699	1.40962	1.50244	1.26515
Ckb	1.3091	0.860099	0.830801	1.93532	1.68246	1.91265
Pparα	0.906151	1.27264	0.82121	1.70152	1.9956	2.71476
Pparγ	0.856387	1.40477	0.738841	1.56085	1.84719	1.62827
Atgl	0.910229	1.14417	0.9456	1.3134	1.49828	1.41255
Hsl	1.05715	1.0734	0.869454	1.44311	1.45013	1.19929
