# Supplementary material for: Constitutively active receptor ADGRA3 signaling induces adipose thermogenesis
Source: eLife journal article supplement (doi:10.7554/elife.100205), 2024-08-12
Supplement: fig4-figsupp2-data1 [file elife-100205-fig4-figsupp2-data1-v1.zip]

## Sheet: Sheet1
Adgra3
Left-CON	Right-Adgra3 OE
0.830938	19.9817
0.866512	42.4244
1.15779	30.3094
1.14476	31.303
	Left-CON				Right-Adgra3 OE
Ucp-1	0.979417	0.97415	0.999617	1.04682	2.07854	2.19019	1.82203	1.94013
Cidea	0.896523	0.807876	1.13076	1.16484	2.14433	4.45001	5.38686	5.65231
Cox8b	1.02096	1.07283	0.964083	0.942127	1.97236	1.95931	1.69901	0.882344
Ckb	0.92273	0.913967	1.08318	1.08012	2.58252	2.54693	1.57763	1.66483
Pparα	0.941124	0.962917	1.09407	1.00189	2.12079	1.95067	1.84641	1.97135
Pparγ	0.905942	0.924588	1.1153	1.05417	2.2661	2.26506	2.77143	2.87401
Atgl	1.06537	1.16443	0.921852	0.848343	3.29489	3.54586	5.02994	5.32613
Hsl	1.02258	1.06433	0.960913	0.952184	2.24544	2.24388	3.07359	3.13783
