# Supplementary material for: Constitutively active receptor ADGRA3 signaling induces adipose thermogenesis
Source: eLife journal article supplement (doi:10.7554/elife.100205), 2024-08-12
Supplement: fig4-figsupp2-data1 [file Figure 4-figure supplement 2A-Source Data 1.xlsx]

## Sheet: Sheet1
HFD-CON	HFD-Adgra3 OE
2.17452	2.11952
2.0681	1.98595
2.20929	2.02571
2.35548	2.2631
2.32476	2.09143
2.54643	2.385
