# Supplementary material for: Constitutively active receptor ADGRA3 signaling induces adipose thermogenesis
Source: eLife journal article supplement (doi:10.7554/elife.100205), 2024-08-12
Supplement: fig4-figsupp2-data1 [file Figure 4-figure supplement 2B-Source Data 1.xlsx]

## Sheet: Sheet1
HFD-CON	HFD-Adgra3 OE
9.64621	8.3452
12.0688	8.82681
12.5729	10.7902
8.0151	10.4876
11.98	9.06139
14.4666	11.7873
