# Supplementary material for: Constitutively active receptor ADGRA3 signaling induces adipose thermogenesis
Source: eLife journal article supplement (doi:10.7554/elife.100205), 2024-08-12
Supplement: fig4-figsupp2-data1 [file Figure 4-figure supplement 2C-Source Data 1.xlsx]

## Sheet: Sheet1
HFD-CON	HFD-Adgra3 OE
0.546649	0.559362
0.533936	0.444947
0.559362	0.444947
0.724628	0.584787
0.750053	0.546649
0.610213	0.45766
