# Supplementary material for: Constitutively active receptor ADGRA3 signaling induces adipose thermogenesis
Source: eLife journal article supplement (doi:10.7554/elife.100205), 2024-08-12
Supplement: fig4-figsupp2-data1 [file Figure 4-figure supplement 2D-Source Data 1.xlsx]

## Sheet: Sheet1
HFD-CON	HFD-Adgra3 OE
0.0771615	0.070536
0.172272	0.044637
0.128045	0.104201
0.172731	0.045727
0.184937	0.087562
0.21653	0.089863
