# Supplementary material for: Constitutively active receptor ADGRA3 signaling induces adipose thermogenesis
Source: eLife journal article supplement (doi:10.7554/elife.100205), 2024-08-12
Supplement: fig5-data2 [file elife-100205-fig5-data2-v1.zip]



UCP1

A Western blot showing UCP1 protein levels across six lanes. A red box highlights the bands, which are of varying intensity, with the third lane showing the most prominent band.



FLAG

A Western blot showing FLAG-tagged protein levels across six lanes. A red box highlights the bands, with the second and fifth lanes showing the most intense bands.



HSP90

A Western blot showing HSP90 protein levels across six lanes. A red box highlights the bands, which appear relatively consistent in intensity across all lanes.

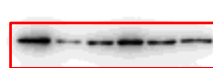

pCREB

A Western blot showing pCREB protein levels across six lanes. A red box highlights the bands, which are of varying intensity, with the third and fourth lanes showing the most intense bands.

CREB

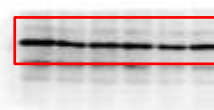

CREB

A Western blot showing CREB protein levels across six lanes. A red box highlights the bands, which are of varying intensity, with the third and fourth lanes showing the most intense bands.
