# Supplementary material for: Constitutively active receptor ADGRA3 signaling induces adipose thermogenesis
Source: eLife journal article supplement (doi:10.7554/elife.100205), 2024-08-12
Supplement: fig5-data3 [file elife-100205-fig5-data3-v1.zip]

## Sheet: Sheet1
shNC	shNC + Adgra3 OE	shGnas	shGnas + Adgra3 OE
18.0501	18.5374	17.6992	12.972
19.0979	16.5628	9.40756	6.97421
15.7712	32.3998	8.68564	11.7799
4.29984	35.7817	11.0365	9.37381
11.6703	40.3839	7.04648	8.76697
3.13938	19.6382	16.9591	8.36652
