# Supplementary material for: Constitutively active receptor ADGRA3 signaling induces adipose thermogenesis
Source: eLife journal article supplement (doi:10.7554/elife.100205), 2024-08-12
Supplement: fig5-data3 [file Figure 5C-Source Data 1.xlsx]

## Sheet: Sheet1
CON	Adgra3 OE
4.98825	27.2606
15.8188	15.8188
13.8172	25.0622
8.08262	15.1364
8.24231	17.4388
19.5894	14.7727
