# Supplementary material for: Constitutively active receptor ADGRA3 signaling induces adipose thermogenesis
Source: eLife journal article supplement (doi:10.7554/elife.100205), 2024-08-12
Supplement: fig5-figsupp1-data3 [file elife-100205-fig5-figsupp1-data3-v1.zip]

## Sheet: Sheet1
Adgra3
shNC	shNC + Adagra3 OE	shGnas	shGnas + Adgra3 OE
0.626417	1534.12	0.83636	2166.57
0.991164	1462.47	0.586497	3003.01
1.38242	1041.32	0.80396	2546.32
Gnas
shNC	shNC + Adagra3 OE	shGnas	shGnas + Adgra3 OE
1.18434	0.912622	0.02011	0.158999
1.20005	1.50325	0.016267	0.24487
0.61561	0.778673	0.011088	0.280309
Ucp1
shNC	shNC + Adagra3 OE	shGnas	shGnas + Adgra3 OE
1.09896	2.84639	1.51061	1.1512
0.813455	3.09542	1.33065	1.36711
1.08759	1.88574	1.03896	1.71016
