# Supplementary material for: Constitutively active receptor ADGRA3 signaling induces adipose thermogenesis
Source: eLife journal article supplement (doi:10.7554/elife.100205), 2024-08-12
Supplement: fig5-figsupp1-data3 [file Figure 5-figure supplement 1D-Source Data 1.xlsx]

## Sheet: Sheet1
CON	Adgra3 OE
8.5913	9.44219
4.48624	4.75991
3.46133	7.17393
5.36467	5.19051
5.47066	7.25825
5.75927	4.60052
