# Supplementary material for: Constitutively active receptor ADGRA3 signaling induces adipose thermogenesis
Source: eLife journal article supplement (doi:10.7554/elife.100205), 2024-08-12
Supplement: fig5-figsupp1-data3 [file Figure 5-figure supplement 1F-Source Data 1.xlsx]

## Sheet: Sheet1
Adgra3
Control	Adagra3 OE	PKAi	PKAi + Adgra3 OE
1.01484	58.2931	0.654404	1145.1
1.04482	48.3101	0.860504	1897.99
0.94034	41.5637	0.681721	822.148
Ucp1
Control	Adagra3 OE	PKAi	PKAi + Adgra3 OE
0.902451	1.46096	0.629344	0.547876
1.10032	2.33743	0.744282	0.79274
1.00411	2.47584	0.657435	0.480271
