# Supplementary material for: Constitutively active receptor ADGRA3 signaling induces adipose thermogenesis
Source: eLife journal article supplement (doi:10.7554/elife.100205), 2024-08-12
Supplement: fig6-data3 [file elife-100205-fig6-data3-v1.zip]

## Sheet: Sheet1
shNC-Veh	shNC-Hes	shAdgra3-Veh	shAdgra3-Hes
99.01	106.3	85.69	78.93
95.89	119.01	88.62	80.5
100.33	108.25	85.31	89.67
99.68	141.75	81.57	92.74
103.45	104.59	83.85	90.49
101.65	132.7		93.39
	shNC-Veh						shNC-Hes						shAdgra3-Veh						shAdgra3-Hes
0	149749	141942	162088	156789	142654	147706	142210	153257	143122	151076	164130	153513		159571	153987	161763	150562	158447	126604	134950	136120	146156	156336	139556
2	142974	167133	172924	155840	173053	142164	168626	157433	137522	174646	189007	233171		148157	183272	157816	148846	155392	132060	109078	177446	130221	157044	144798
4	77300	203213	173608	192206	208678	192401	153282	144716	167463	189258	178555	178736		159401	167566	142775	137486	145942	155786	166761	175960	163399	160038	151703
6	152452	195926	172317	161792	104720	189884	167821	194931	184629	226023	183053	215254		169636	151411	156957	143641	145827	138038	183090	175021	164698	152016	158450
8	110367	156166	156002	134495	98533	159472	152711	166264	163726	203734	174055	256661		151190	125633	139309	144481	122112	107152	150797	152654	174874	156123	124276
10	181382	232470	181296	178809	261150	188466	173426	167127	193095	230615	187598	283260		148888	180088	122484	147163	159927	144739	200095	179595	182952	166355	151965
12	110453	168003	173666	139389	149634	225812	198868	196656	166753	258025	196843	282750		148717	150026	156582	158596	145011	139454	148741	150589	142395	163566	153896
14	140054	154586	175414	142545	221105	104458	198110	202677	223272	215841	193702	213317		156043	162382	139506	137479	161467	143672	132699	143540	165576	147338	162324
16	82699.2	164655	177041	154097	196545	186789	182315	207529	165661	240842	194924	223660		169744	158292	149236	148803	149818	148985	126959	147543	140719	152539	157705
18	168419	148912	183101	152253	84992	182466	188287	194942	172551	211080	183647	218082		133587	160443	153254	149263	153497	126093	132336	157613	134670	142644	147676
20	158642	175716	194125	176318	209079	195040	188672	259904	211246	245526	200402	199022		153650	171830	168404	151079	158122	148214	144470	143179	119841	192655	161509
22	213932	214470	183219	182203	301534	177911	208224	234838	219147	276879	184588	241123		167552	161527	159231	172057	167427	164561	162231	130392	145683	161577	153607
24	242534	185186	212856	170456	221952	180862	186112	216291	204814	298531	223787	258868		144897	192322	171661	150970	172255	165634	192169	190352	210696	175948	179642
26	150157	157733	184050	167462	227251	191688	204246	180811	206705	218031	184541	152336		160653	160454	151252	132402	163850	142948	134517	174600	165161	182152	161165
28	181158	201956	210654	182438	309971	170290	213180	224755	220072	331396	210112	372162		188668	164535	167981	173416	158057	183482	154155	170808	211402	182976	188815
30	177720	230293	191575	192408	167751	153438	230803	212939	236063	276470	204499	216808		182830	193861	179091	178186	169510	156400	184374	147707	190142	185109	177290
32	244860	165978	183341	176556	135363	204597	187578	209797	214293	273048	211356	342412		148793	156596	146514	153490	171622	143533	162686	164064	188434	166176	163102
34	175957	173883	217983	191000	243604	192540	228287	246933	188150	305928	203751	255323		161754	178341	173504	151505	146161	127049	178827	152845	203776	173538	195806
36	112886	180380	196950	175746	150254	183926	207753	225895	219084	258489	212034	292649		163038	173455	154195	142622	174030	158886	185528	176142	186603	167913	184678
38	114794	203376	157744	212507	127980	224098	213995	230975	229957	267388	210114	145410		169815	179098	177535	150665	166079	138367	119224	157305	169338	181406	177153
40	213358	213515	211540	208381	221587	221034	236274	250315	206310	290751	214050	388816		160049	174518	183228	172458	170807	150919	144299	184601	211456	183063	192314
42	201098	180933	190265	229168	104246	233941	201273	255643	196786	264265	206924	293847		140934	177446	172304	172570	162954	184620	149468	179263	206025	190292	193952
44	225686	191528	185891	204610	364661	244832	253089	252128	236671	305553	227678	306534		171343	171392	172487	163244	140754	138032	174405	181544	191562	184078	216726
46	282376	218729	209367	197999	203363	243864	221295	261810	232461	294597	228972	322994		180831	180430	193354	162296	164285	148871	196612	191463	167800	182610	212548
48	197854	220333	227141	205882	203820	196746	200371	273831	215873	303311	216701	261182		197279	191131	169425	170459	169196	160957	169244	218452	180627	202667	176986
50	216928	199489	215655	181221	216590	162385	198897	262315	268246	278988	204936	245207		168300	156091	165221	140247	161680	144215	132303	152798	181224	170072	183673
52	210003	179682	183242	212430	116410	235469	204119	243201	187025	260054	211055	298591		167045	173632	170205	154802	157081	147029	131181	175365	232906	160813	182146
54	247137	165175	223825	203722	179624	210052	197665	246083	229745	293415	199459	302777		163722	178765	172532	159250	161886	158453	138337	206859	194429	186744	229626
56	242594	180795	198350	201845	188330	209904	216559	263604	225257	316311	206565	248439		182412	196723	174536	167294	168851	154240	194523	184917	196475	193169	194039
58	215218	214260	202334	213657	269268	251661	219599	275911	221834	309775	203772	262908		170414	186616	186822	182454	163292	191416	152602	185298	246739	186355	194280
60	238951	215642	194802	224227	284286	189087	236417	259333	220813	325082	224313	303565		198225	197453	178233	169411	171559	184125	146366	198106	191660	190390	202762
62	259783	230432	219394	217549	247599	257860	234894	232926	237104	325430	216727	278608		163772	170665	176121	164510	179645	137725	201503	181473	197611	192677	217769
64	146725	172037	159066	196096	180751	210214	185711	226406	219050	241304	188405	208626		165550	154952	158577	136196	160638	149692	143693	173980	121073	177267	148053
66	298799	178032	200452	198150	225314	246708	201528	258441	225588	289878	175754	234449		162892	169459	169244	161493	166613	179542	150355	173660	243876	185903	178660
68	114126	194896	178995	194836	211822	211924	223668	247020	212421	307995	202448	171231		161542	189090	161961	138659	172427	172089	171614	206297	227842	186756	208630
70	220201	197631	196353	193073	181369	203320	208146	247042	223204	290324	208851	328563		169996	171188	165139	161251	152211	180958	147920	175027	176263	181942	183267
72	198585	171784	206113	214126	247427	212312	233515	270452	195953	293545	226078	331379		204630	180822	167037	167763	173466	127699	154492	187594	164645	197343	197358
74	167557	155682	206067	196888	176635	194600	208715	238248	227502	292276	201419	277711		152902	177258	167274	154874	166527	139991	166820	182878	216580	169917	198861
76	249129	206751	227913	213820	248270	188118	232898	245827	206188	331134	192992	280722		159381	178108	174428	175262	168978	159454	158884	179116	259221	189466	209092
78	184710	215340	204659	212793	224125	249894	206933	263366	230690	292860	218327	197906		186330	192346	154145	168110	164659	177281	144527	170635	142119	170324	199032
80	150862	158600	189500	205781	170539	155546	193182	164508	208703	272486	179397	170678		158426	152819	155393	157595	158706	136235	96704.8	159124	95975.7	168000	164560
82	166567	150286	192849	235009	150891	215133	203988	232021	227886	289369	187955	251292		183738	157747	179094	154565	164926	173457	162094	168339	178587	185557	190767
84	240241	182792	222081	227756	167023	220766	242019	257511	228911	335183	212428	276803		167388	182961	179279	170391	179113	173827	159874	200932	197765	184896	202028
86	340342	175796	207030	224365	281268	223804	229710	234442	190903	323564	209372	261812		178691	180888	176775	163397	173558	188869	173800	215545	155762	167348	208613
88	205930	186824	195657	196340	227212	165311	239007	241473	215937	300285	190421	363596		188497	186708	165500	180211	165226	152336	151025	161886	190085	190355	183642
90	209523	189229	191264	197532	235036	202778	197027	230029	230509	287550	204358	270401		165244	151987	164574	160720	158590	135476	170570	166633	181446	162681	196336
92	189654	158934	208581	198751	111161	196642	180339	237003	203475	242552	213172	231869		158613	168395	176356	145990	154433	140763	129712	159998	187362	165418	149788
94	234021	235675	215989	222887	257204	176006	251900	261626	243590	304702	230965	397674		178913	172742	170995	158005	162952	173929	154146	224572	194910	196313	191701
96	205777	182185	191381	187536	222943	177904	233416	312160	203699	292342	217675	188633		174077	151715	147997	156542	172942	159039	169204	162869	107407	170050	169717
98	265493	180146	195242	220593	149034	193752	212672	273753	194659	280972	208126	204742		187721	189304	174816	171031	163008	168659	153959	169705	178224	176046	209303
100	215364	204223	198089	211709	256251	171422	211741	243577	245057	301676	209075	313000		163660	178506	179344	175393	163978	158790	138385	182181	246231	163629	198426
102	188783	197621	219860	217075	160691	216960	235549	217782	219951	307840	215478	249739		141803	170698	183770	165160	184868	166867	159688	175937	249798	186477	210606
104	157366	163394	200975	199370	195139	203716	202758	223296	204082	270124	210097	206193		158197	178087	148079	159111	157914	133547	171632	198799	164486	179370	180338
106	185058	162388	183997	189440	209149	190684	204758	228002	212690	300938	202465	226156		149939	161984	170089	149908	167804	141382	143868	174756	159059	189339	177838
108	187262	175330	188052	182213	209426	164017	184869	234484	230680	251134	198961	263054		170824	175117	166148	167762	173810	136961	178906	151021	118529	161544	172573
