# Supplementary material for: Constitutively active receptor ADGRA3 signaling induces adipose thermogenesis
Source: eLife journal article supplement (doi:10.7554/elife.100205), 2024-08-12
Supplement: fig6-data3 [file Figure 6B-Source Data 1.xlsx]

## Sheet: Sheet1
Veh	Hes
11.2333	15.4667
11.7826	17.6201
10.81	17.4441
