# Supplementary material for: Constitutively active receptor ADGRA3 signaling induces adipose thermogenesis
Source: eLife journal article supplement (doi:10.7554/elife.100205), 2024-08-12
Supplement: fig6-data3 [file Figure 6C-Source Data 1.xlsx]

## Sheet: Sheet1
Veh	Hes
1.09285	3.04428
0.951384	2.85621
0.991098	3.00653
0.964665	3.0485
