# Supplementary material for: Constitutively active receptor ADGRA3 signaling induces adipose thermogenesis
Source: eLife journal article supplement (doi:10.7554/elife.100205), 2024-08-12
Supplement: fig6-data3 [file Figure 6E-Source Data 1.xlsx]

## Sheet: Sheet1
Adgra3
DMSO	Hes	DMSO + shAdgra3	Hes + shAdgra3
1.11716	1.294	0.004879	0.153875
1.04379	1.46493	0.190496	0.060742
0.839052	0.960483	0.276018	0.061889
Ucp1
DMSO	Hes	DMSO + shAdgra3	Hes + shAdgra3
0.94868	5.99182	0.434068	0.569195
0.87115	4.75351	0.382092	0.416098
1.18017	3.26706	0.414658	0.380243
