# Supplementary material for: Constitutively active receptor ADGRA3 signaling induces adipose thermogenesis
Source: eLife journal article supplement (doi:10.7554/elife.100205), 2024-08-12
Supplement: fig6-data3 [file Figure 6H-Source Data 1.xlsx]

## Sheet: Sheet1
shNC-Veh	shNC-Hes	shAdgra3-Veh	shAdgra3-Hes
91.16	130.6	82.05	88.15
107.4	110.32	81.57	89.94
103.11	114.24	89.06	89.48
98.34
	shNC-Veh-FCCP				shNC-Hes-FCCP					shAdgra3-Veh-FCCP			shAdgra3-Hes-FCCP
0	224624	209611	228710	190636	199744	194382	199239			215988	239206	220316	209497	220436	205303
2	225932	261760	222552	185103	407186	175006	243865			225522	227854	284865	200583	195176	213615
4	250414	262399	291841	249588	235506	268622	255622			210265	245041	225089	199974	249762	214684
6	211833	238634	313884	220590	256690	283146	222563			218524	144700	244770	183788	239308	233849
8	250626	278384	317770	220684	396257	270051	237069			203601	188646	257877	211063	112856	215079
10	227313	274397	267532	227674	321942	242387	280479			204478	193870	213429	253565	133966	212496
12	197380	272015	270122	197573	339243	285846	324081			195945	210990	206516	203900	88174	249017
14	247297	326846	294592	273856	251881	363796	252011			203015	201238	318850	259031	308716	252666
16	249731	356132	310169	311755	381018	383124	305986			220378	242712	263216	330681	381600	291199
18	234545	273843	298254	255662	324163	266749	323271			235237	256186	265749	292030	269648	270571
20	242855	306145	258079	287690	401984	291043	337742			224683	233813	282054	309555	274332	240996
22	246334	300331	276890	306062	340826	386336	315029			279186	266195	259172	331432	334160	250000
24	285723	374355	331192	306234	359856	281204	393043			241682	286291	265068	346657	346808	267597
26	287194	349232	307482	306921	435245	336390	366889			293550	235900	255975	297307	278728	288652
28	296508	329191	370334	313530	499815	342181	308557			258999	309041	253377	393304	265912	293062
30	277423	352929	309198	368176	444250	335266	361932			251076	221189	307799	384006	296050	296925
32	247918	306266	331361	268959	265446	303734	308367			243028	257687	237783	217841	284162	246433
34	303052	302714	313483	291000	465341	401910	397549			281711	245130	270796	305218	191992	289088
36	308570	309496	353144	304209	448868	319208	357315			247780	238004	276586	274033	199674	309743
38	303666	327223	355895	344484	314292	440174	300302			281382	317137	297578	331215	275705	301425
40	312147	416280	333877	323215	387740	339201	317547			276220	234356	262860	250571	269895	297871
42	280631	335205	344810	328919	546559	424481	340294			265208	271381	292544	233415	407799	275079
44	266211	342126	317127	355589	456418	343134	370293			270608	267101	277365	183760	275941	295789
46	282256	329127	311896	301142	460692	268864	384471			262875	231330	299788	233201	431523	315577
48	292797	311845	338376	299252	492788	384250	339085			260294	271927	261533	282757	163835	283620
50	296693	358571	363959	291215	445865	290743	388476			277689	281507	262082	295320	212663	309647
52	290152	345783	315256	334874	393549	421637	433576			209608	275038	267433	248631	213562	281875
54	272612	369314	299502	324944	321379	396093	316057			230808	278652	299888	158924	104818	269145
56	316610	346025	327527	382296	529736	378402	419745			258018	267416	281521	330170	285305	310269
58	302607	326465	317562	332911	432812	409083	338275			288942	271304	280943	289390	286437	273473
60	285035	370436	309436	330439	345136	317767	399542			260149	204723	252109	299685	191562	268793
62	287624	358528	355541	319118	322259	304014	388003			313518	277084	273794	314339	399259	269492
64	315186	330891	315257	305786	403395	365553	379453			255207	328661	288744	278612	240054	282614
66	331011	356242	329266	281976	472409	291256	419061			249012	226135	282643	243524	248970	295977
68	282548	368236	287828	302892	290199	402066	354293			256983	248190	268187	265690	190875	276395
70	299802	311728	307892	329012	378451	310619	388787			238496	232169	264382	240041	316263	272935
72	315648	342586	300559	354225	381757	341059	329320			265035	230449	318533	228657	282736	289906
74	307006	383419	301268	353495	527585	360249	360467			250125	216102	285438	366062	288728	270626
76	265696	350464	335463	308686	373993	348450	331329			258532	239397	302870	285724	256840	298256
78	267536	309011	290048	288104	425895	296991	372529			237910	199862	210083	198889	121050	257564
80	287970	333299	321516	302268	366954	309256	347229			263629	218269	311174	279884	273288	255943
82	300762	324032	280509	281315	317211	394119	401019			267010	300289	245753	231328	210694	253303
84	308818	342887	317190	226832	463078	301932	474630			240897	277630	244100	368736	321836	259991
86	301855	415019	305827	358628	528959	415118	397640			296316	304636	316139	356739	333043	313242
88	281411	363991	366816	355827	579790	326787	389393			250081	194971	300206	306400	278738	296481
90	252504	344356	325344	319460	457854	315988	312131			267636	289580	291390	255605	480334	272042
92	291718	309909	302878	241828	461352	377644	349615			285433	194430	245082	214850	469544	259395
94	250364	294386	286344	331743	421513	417284	331833			245425	257467	283323	242917	298086	260043
96	293461	329128	363440	323545	467274	345153	466083			266834	317046	267048	293645	375330	293172
98	281758	293794	312182	303719	371224	303379	300224			190133	177923	286231	154155	405758	279217
100	304300	332970	363486	342273	307409	406506	387845			240297	344145	279837	224996	362379	298826
102	275402	329726	339386	288612	437494	372426	451533			243197	212687	277259	252805	282755	274468
