# Supplementary material for: Constitutively active receptor ADGRA3 signaling induces adipose thermogenesis
Source: eLife journal article supplement (doi:10.7554/elife.100205), 2024-08-12
Supplement: fig6-data3 [file Figure 6I-Source Data 1.xlsx]

## Sheet: Sheet1
Gnas					Ucp1
DMSO	Hes	DMSO + shGnas	Hes + shGnas		DMSO	Hes	DMSO + shGnas	Hes + shGnas
0.99226	0.971866	0.501026	0.306495		1.07467	2.47011	0.242216	0.199836
1.04567	1.02995	0.238817	0.333615		0.871679	2.66531	0.264387	0.234573
0.962069	0.958967	0.30688	0.404694		1.05365	3.56826	0.303523	0.437505
