# Supplementary material for: Constitutively active receptor ADGRA3 signaling induces adipose thermogenesis
Source: eLife journal article supplement (doi:10.7554/elife.100205), 2024-08-12
Supplement: fig6-data3 [file Figure 6K-Source Data 1.xlsx]

## Sheet: Sheet1
Veh	Hes	PKAi	Hes + PKAi
0.808131	2.55737	0.262004	0.468026
1.09707	2.27468	0.415425	0.466407
1.0948	1.87991	0.589131	0.490274
