# Supplementary material for: Constitutively active receptor ADGRA3 signaling induces adipose thermogenesis
Source: eLife journal article supplement (doi:10.7554/elife.100205), 2024-08-12
Supplement: fig7-data1 [file elife-100205-fig7-data1-v1.zip]

## Sheet: Sheet1
	HFD-shNC						HFD-shAdgra3						HFD-shNC-Hes						HFD-shAdgra3-Hes
0	25.2	22.1	24.8	23.8	24.1	23.5	24	24	22.8	24.1	23.5	25	24.9	23.3	24.2	24.1	23.1		24.3	24.2	23.1	24.1	23.8
1	25.4	23	27	25.5	25.1	26.1	24.9	25.9	24.5	25.1	25.2	25.9	26.9	24.5	25	25	25.5		25	26.2	25.4	25.1	25
2	26.3	23.4	27.9	26.2	26.1	26.8	26.8	26.6	25	26	26.2	27.7	27.6	25.6	26	25.4	26.1		26.4	27	27	26.3	25.3
3	27.7	24.4	28.2	26.7	27	28.4	28.8	29	27	27.5	27.7	29.8	27.8	25.5	26.4	26	26.7		28.5	28.7	29	28.4	27.3
4	28.1	24.5	29.1	27.5	27.2	29.6	30.1	29.8	28.1	28.6	29	30.8	27.7	25.9	27.3	25.9	26.2		29.6	29.4	29.3	30.2	27.9
5	28.4	24.9	30.6	28.3	28	30.4	30.5	30.4	28.4	28.9	29.8	32	27.9	26.3	27.3	26.4	27.6		30.1	29.9	30.5	29.4	28.2
6	29.8	26.1	31.3	29.7	28.9	31.5	30.9	31.4	30	30.3	29.5	32.6	29.9	27.7	28.2	25.5	29		32.1	31	32.4	30.5	29.7
7	30.5	27	31.8	31.1	29.4	32.3	32.3	32.9	32	32.2	32.3	34	30.1	28.2	28.1	26.9	30		32.2	31.5	34	31.5	30.9
8	30.6	26.7	33.8	32.2	29.7	33.2	32.5	33.6	32.5	32.3	32.3	34.5	31.3	28	28.2	28.5	31.1		32.6	31.6	34.9	32.1	31.1
9	31.2	26.5	34.1	32.7	30.5	33.1	33.4	34.5	32.9	32.7	32.6	35.3	29.2	29.1	29.4	29	30.8		32.5	32.6	34.7	32.8	31.1
10	31.7	27.3	33.4	32.2	30.8	33.6	34.8	34.5	33.6	33.4	33	35.5	31.1	29.8	30	29.3	31.1		34	33.5	36.1	34.1	32.6
11	32.9	27.9	35.9	33.1	31.5	35.1	35.6	35.7	34.9	34.5	34.1	36.7	34.1	29.2	30	30.8	32.5		37.4	34.1	38.8	34.2	34.1
12	33.4	28.8	36	33.6	32.3	35.5	36	36.3	35.5	35.1	34.8	36.6	34.4	29.5	30.3	30.5	32.9		37.2	34.6	38.5	35.3	35.2
