# Supplementary material for: Constitutively active receptor ADGRA3 signaling induces adipose thermogenesis
Source: eLife journal article supplement (doi:10.7554/elife.100205), 2024-08-12
Supplement: fig7-data1 [file Figure 7C-Source Data 1.xlsx]

## Sheet: Sheet1
	iWAT					eWAT
	HFD-shNC	HFD-shAdgra3	HFD-shNC-Hes	HFD-shAdgra3-Hes		HFD-shNC	HFD-shAdgra3	HFD-shNC-Hes	HFD-shAdgra3-Hes
	1.019	1.075	0.872	1.002		1.216	1.398	0.967	1.388
	0.972	1.144	0.922	1.044		1.178	1.45	1.057	1.301
	0.967	1.02	0.925	1.202		1.145	1.237	1.024	1.695
	1.007	1.191	0.968	1.01		1.133	1.547	1.03	1.226
	0.96	1.036	0.927	1.051		1.192	1.342	1.111	1.232
	0.993	1.052				1.187	1.473
	BAT					Liver
	HFD-shNC	HFD-shAdgra3	HFD-shNC-Hes	HFD-shAdgra3-Hes		HFD-shNC	HFD-shAdgra3	HFD-shNC-Hes	HFD-shAdgra3-Hes
	0.255	0.251	0.174	0.242		0.045092	0.045343	0.039608	0.04231
	0.243	0.264	0.177	0.262		0.0432616	0.047265	0.041718	0.047351
	0.192	0.261	0.158	0.31		0.0428116	0.045533	0.041313	0.043913
	0.19	0.3	0.189	0.172		0.044778	0.044184	0.042055	0.04823
	0.22	0.285	0.206	0.225		0.043799	0.049581	0.038723	0.045905
	0.253	0.349				0.042124	0.048588
