# Supplementary material for: Constitutively active receptor ADGRA3 signaling induces adipose thermogenesis
Source: eLife journal article supplement (doi:10.7554/elife.100205), 2024-08-12
Supplement: fig7-data1 [file Figure 7D-Source Data 1.xlsx]

## Sheet: Sheet1
HFD-shNC	HFD-shAdgra3	HFD-shNC-Hes	HFD-shAdgra3-Hes
36.2	36	36.3	36.1
36.3	35.7	36.6	36.2
36.1	35.8	36.6	35.6
36	35.7	36.5	35.6
36.1	35.7	36.3	35.8
36.4	35.6
