# Supplementary material for: Constitutively active receptor ADGRA3 signaling induces adipose thermogenesis
Source: eLife journal article supplement (doi:10.7554/elife.100205), 2024-08-12
Supplement: fig7-data1 [file Figure 7E-Source Data 2.xlsx]

## Sheet: Sheet1
HFD-shNC	HFD-shAdgra3	HFD-shNC-Hes	HFD-shAdgra3-Hes
35.5	34.9	36	36
35	35.1	37	35.4
35.5	34.9	36.9	35.1
35.7	34.7	36.8	35.5
35.4	34.6	36.5	35.1
35.5	34.7
