# Supplementary material for: Constitutively active receptor ADGRA3 signaling induces adipose thermogenesis
Source: eLife journal article supplement (doi:10.7554/elife.100205), 2024-08-12
Supplement: fig7-data1 [file Figure 7F-Source Data 1.xlsx]

## Sheet: Sheet1
Adgra3
HFD-shNC	HFD-shAdgra3	HFD-shNC-Hes	HFD-shAdgra3-Hes
0.946183	0.451361	1.05271	0.412875
1.02911	0.246186	1.47111	0.249093
1.0247	0.252467	0.783504	0.384126
Ucp1
HFD-shNC	HFD-shAdgra3	HFD-shNC-Hes	HFD-shAdgra3-Hes
1.01681	0.477026	3.15867	0.426607
0.929671	0.402731	3.31246	0.427088
1.05552	0.247726	2.40674	0.689869
