# Supplementary material for: Constitutively active receptor ADGRA3 signaling induces adipose thermogenesis
Source: eLife journal article supplement (doi:10.7554/elife.100205), 2024-08-12
Supplement: fig7-data1 [file Figure 7G-Source Data 1.xlsx]

## Sheet: Sheet1
Adgra3
HFD-shNC	HFD-shAdgra3	HFD-shNC-Hes	HFD-shAdgra3-Hes
0.958287	0.148602	1.41375	0.255878
0.880582	0.30345	0.931437	0.256056
1.16113	0.198406	1.19792	0.314151
Ucp1
HFD-shNC	HFD-shAdgra3	HFD-shNC-Hes	HFD-shAdgra3-Hes
0.892039	0.309321	2.86827	0.502842
0.710141	0.334523	3.51659	0.516263
1.39782	0.320008	3.15618	0.606752
