# Supplementary material for: Constitutively active receptor ADGRA3 signaling induces adipose thermogenesis
Source: eLife journal article supplement (doi:10.7554/elife.100205), 2024-08-12
Supplement: fig7-data1 [file Figure 7K-Source Data 1.xlsx]

## Sheet: Sheet1
HFD-shNC	HFD-shAdgra3	HFD-shNC-Hes	HFD-shAdgra3-Hes
1059	1304.25	864.75	1227.75
945	1513.5	790.5	1140
984.75	1254.75	735	1192.5
1021.5	1404	878.25	1149.75
1383	1431.75	933.75	1832.25
1233.75	1545
	HFD-shNC						HFD-shAdgra3						HFD-shNC-Hes						HFD-shAdgra3-Hes
0	7.1	7.4	7.6	9.6	8.7	8.5	9.4	9.8	9.1	10.1	10.9	10.5	7.4	6.4	7.1	5.2	7.8		9.7	7.5	7.8	8.9	11.4
15	18.9	13.1	15.5	15.1	17.6	15	17.6	21.6	17.3	18.7	21	18.3	15.3	11.6	10.4	13.8	15.3		17.2	16.5	15.8	16.2	22.6
30	11.7	11.4	10.3	11.6	14.7	12.6	13.5	16.2	13.8	14.5	16.8	15.7	7.9	9	6.7	9.1	8.7		15	11.3	14	10.6	21.7
60	7.2	6.5	6.5	6.1	10.6	9.3	9.1	10.6	8.8	10.3	9.6	12.5	6.3	4.9	4.9	5.9	6.4		8.8	8	8.6	9.5	12.5
90	5.5	5.5	6	6.7	9.8	9.2	8.8	9.7	7.9	9.1	9.1	10.6	4.5	5.1	5.3	5.8	6.3		7	8.1	8	7.2	12.9
120	5.2	5.1	5.9	5.2	7.4	7.1	8.6	9.5	7.7	9.3	6.4	9.7	5.2	4.4	4.6	5.1	4.6		5.7	6.6	5.6	6.7	10.5
