# Supplementary material for: Constitutively active receptor ADGRA3 signaling induces adipose thermogenesis
Source: eLife journal article supplement (doi:10.7554/elife.100205), 2024-08-12
Supplement: fig7-data1 [file Figure 7L-Source Data 1.xlsx]

## Sheet: Sheet1
	HFD-shNC	HFD-shAdgra3	HFD-shNC-Hes	HFD-shAdgra3-Hes
0	901.5	1281.75	706.5	895.5
7	870	1016.25	809.25	1008
14	867.75	1069.5	792	1176.75
	990	1105.5	730.5	993.75
	804	953.25	746.25	1051.5
	820.5	1038
	HFD-shNC						HFD-shAdgra3						HFD-shNC-Hes						HFD-shAdgra3-Hes
0	11.6	9.6	10.2	11.5	10.1	10.7	14.8	13	11.7	12.9	12.1	11.8	8.4	10.4	10.1	8.8	10		10.3	14	13.1	10.4	12.3
15	8.5	6.8	7.4	9.5	7.5	7	11.9	10	9.8	10.6	10.5	9	6.4	6.7	6	6.8	6.7		6.5	9.5	8.1	9.9	10.2
30	5.2	6	5.3	6.5	5.7	5.5	8.3	6.3	6.9	7.3	6.6	7.8	4.6	4.7	4.3	4	4.5		6.3	5.6	6.4	6.3	6.3
60	6.7	7	7	7.9	5.1	6.4	9.8	7.7	7.9	8.4	6.8	7.7	5.5	6.1	5.5	5.1	5.9		6.9	7.3	10	8.4	8.2
90	7.8	7.1	7.2	7.7	6.2	6.6	11.2	8.7	9.3	9.4	7.3	8.9	5.7	7	8.1	6.2	5.3		7.7	8.8	10.4	8.4	8.8
120	9	9.2	9	9.8	9.9	8.1	11.7	9	10.9	10.1	8.9	9.4	7.2	8.8	8.1	8.9	8.9		9.4	10.1	13.4	8.1	10.3
