# Supplementary material for: Constitutively active receptor ADGRA3 signaling induces adipose thermogenesis
Source: eLife journal article supplement (doi:10.7554/elife.100205), 2024-08-12
Supplement: fig7-data1 [file Figure 7M-Source Data 1.xlsx]

## Sheet: Sheet1
	HFD-shNC	HFD-shAdgra3	HFD-shNC-Hes	HFD-shAdgra3-Hes
	4.98367	5.35761	4.48509	4.73438
	4.36045	6.35477	4.2358	4.85902
	5.60689	6.97799	4.11116	6.60405
	4.85902	5.73154	4.36045	5.85618
	4.85902	6.10548	3.73722	5.85618
	4.73438	5.48225
