# Supplementary material for: Constitutively active receptor ADGRA3 signaling induces adipose thermogenesis
Source: eLife journal article supplement (doi:10.7554/elife.100205), 2024-08-12
Supplement: fig7-data1 [file Figure 7N-Source Data 1.xlsx]

## Sheet: Sheet1
	HFD-shNC	HFD-shAdgra3	HFD-shNC-Hes	HFD-shAdgra3-Hes
	1.57262	1.97636	1.09635	1.85167
	1.56976	2.68312	1.12955	1.59808
	1.59485	2.7912	1.26075	2.87643
	2.02999	2.19072	1.31782	2.55069
	1.59808	3.0663	1.32879	2.21234
	1.93584	2.46092
