# Supplementary material for: Constitutively active receptor ADGRA3 signaling induces adipose thermogenesis
Source: eLife journal article supplement (doi:10.7554/elife.100205), 2024-08-12
Supplement: fig7-figsupp1-data1 [file elife-100205-fig7-figsupp1-data1-v1.zip]

## Sheet: Sheet1
HFD-shNC	HFD-shAdgra3	HFD-shNC-Hes	HFD-shAdgra3-Hes
16.473	14.0056	7.53165	8.11655
7.92989	14.8475	10.8702	11.98
9.84338	12.9211	8.96907	13.7924
13.4277	12.4716	9.5139	9.7959
11.2634	13.1517	8.73266	12.2768
10.4588	12.4967
