# Supplementary material for: Constitutively active receptor ADGRA3 signaling induces adipose thermogenesis
Source: eLife journal article supplement (doi:10.7554/elife.100205), 2024-08-12
Supplement: fig8-data1 [file elife-100205-fig8-data1-v1.zip]

## Sheet: Sheet1
ADGRA3					UCP1
shNC	shADGRA3-1	shADGRA3-2	shADGRA3-3		shNC	shADGRA3-1	shADGRA3-2	shADGRA3-3
0.986828	0.187617	0.258778	0.198731		1.23273	0.447421	0.203964	0.549113
1.20473	0.414846	0.173701	0.228096		1.04635	0.317395	0.245354	0.349922
0.808438	0.459095	0.175412	0.402974		0.720919	0.236375	0.307896	0.401149
