# Supplementary material for: Constitutively active receptor ADGRA3 signaling induces adipose thermogenesis
Source: eLife journal article supplement (doi:10.7554/elife.100205), 2024-08-12
Supplement: fig8-data1 [file Figure 8B-Source Data 1.xlsx]

## Sheet: Sheet1
ADGRA3				UCP1
CON	ADGRA3 OE			CON	ADGRA3 OE
0.701594	4.03036			0.98066	4.97231
0.82213	4.73717			0.488116	2.10371
1.60003	3.54609			1.23669	2.90631
0.876249	4.43013			1.29453	3.75159
