# Supplementary material for: Constitutively active receptor ADGRA3 signaling induces adipose thermogenesis
Source: eLife journal article supplement (doi:10.7554/elife.100205), 2024-08-12
Supplement: fig8-data1 [file Figure 8E-Source Data 1.xlsx]

## Sheet: Sheet1
Adgra3			Ucp1
shNC	shAdgra3		shNC	shAdgra3
1.44113	0.091963		0.750841	0.267309
0.918403	0.114007		1.05452	0.313509
0.640468	0.090697		1.19464	0.324565
