# Supplementary material for: Constitutively active receptor ADGRA3 signaling induces adipose thermogenesis
Source: eLife journal article supplement (doi:10.7554/elife.100205), 2024-08-12
Supplement: fig8-data1 [file Figure 8F-Source Data 1.xlsx]

## Sheet: Sheet1
Adgra3			Ucp1
CON	Adgra3 OE		CON	Adgra3 OE
0.950584	14.1908		0.794528	5.45723
1.37258	6.57452		1.5138	3.57556
0.67684	12.016		0.691677	3.93993
