# Supplementary material for: Constitutively active receptor ADGRA3 signaling induces adipose thermogenesis
Source: eLife journal article supplement (doi:10.7554/elife.100205), 2024-08-12
Supplement: fig8-data1 [file Figure 8G-Source Data 1.xlsx]

## Sheet: Sheet1
0	5	10
1.34326	1.68849	2.68651
0.815488	1.4003	3.82573
1.1063	1.68849	3.47193
0.734959	2.09324	2.24348
