# Supplementary material for: Constitutively active receptor ADGRA3 signaling induces adipose thermogenesis
Source: eLife journal article supplement (doi:10.7554/elife.100205), 2024-08-12
Supplement: fig8-data1 [file Figure 8H-Source Data 1.xlsx]

## Sheet: Sheet1
Adgra3
shNC-Veh	shNC-Hes	shAdgra3-Veh	shAdgra3-Hes
1.16809	1.24328	0.157579	0.121932
0.749577	1.05274	0.129781	0.099728
1.08234	1.4888	0.213773	0.114558
Ucp1
shNC-Veh	shNC-Hes	shAdgra3-Veh	shAdgra3-Hes
1.02265	1.86907	0.299851	0.36916
1.02977	3.14338	0.401179	0.583303
0.947579	3.56109	0.583303	0.48711
