# Supplementary figures and images for: Constitutively active receptor ADGRA3 signaling induces adipose thermogenesis
Source: eLife journal article supplement (doi:10.7554/elife.100205), 2024-08-12

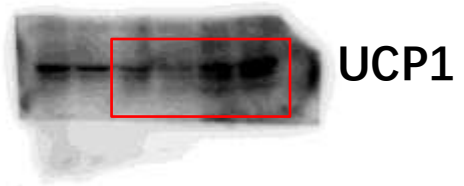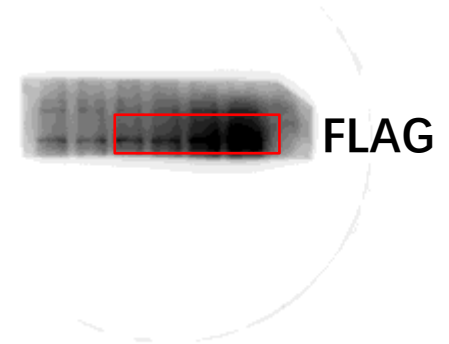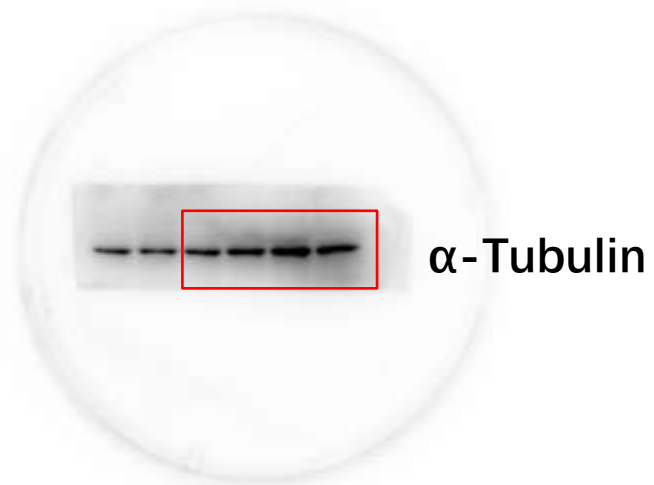

Supplement: fig2-data2 [file elife-100205-fig2-data2-v1.zip]

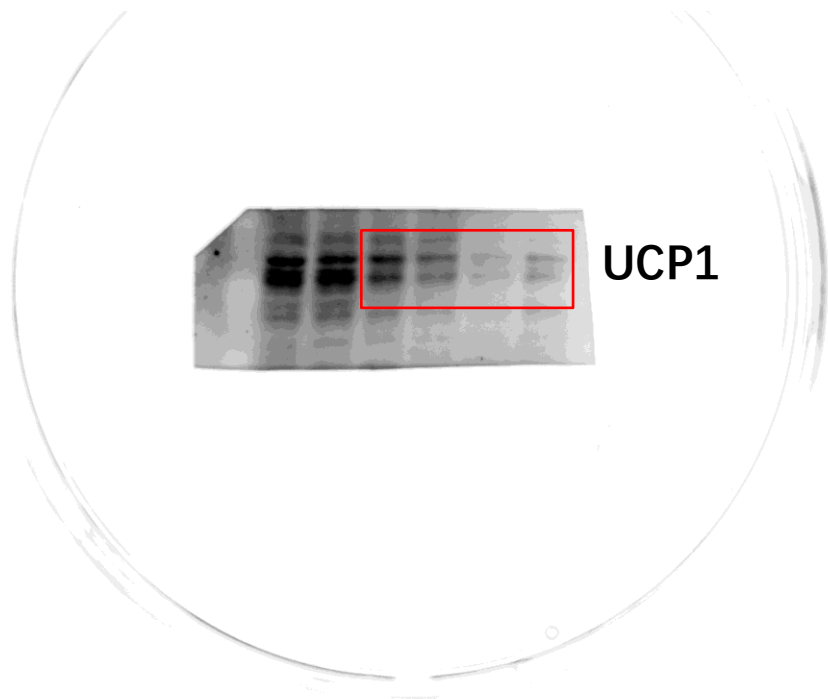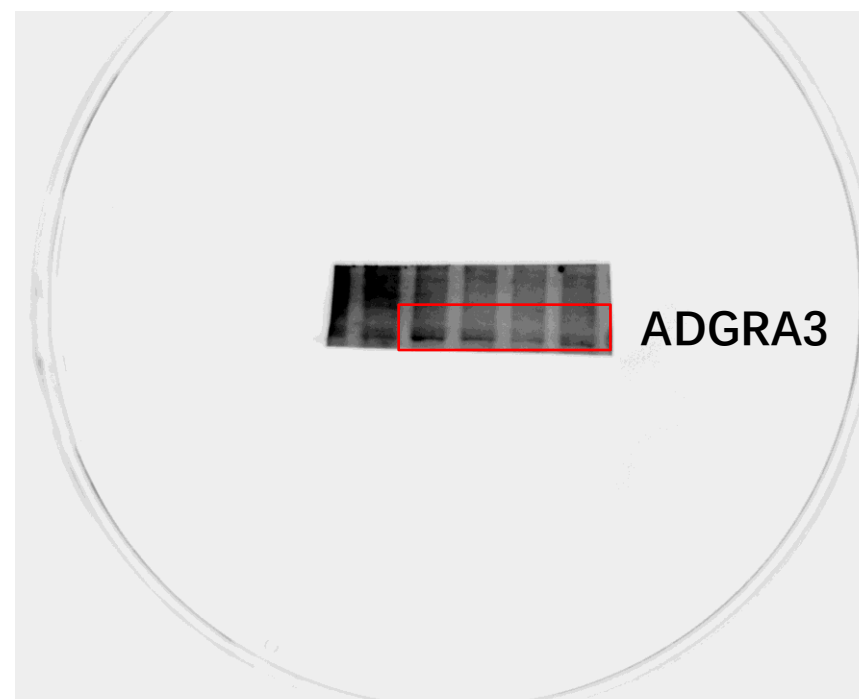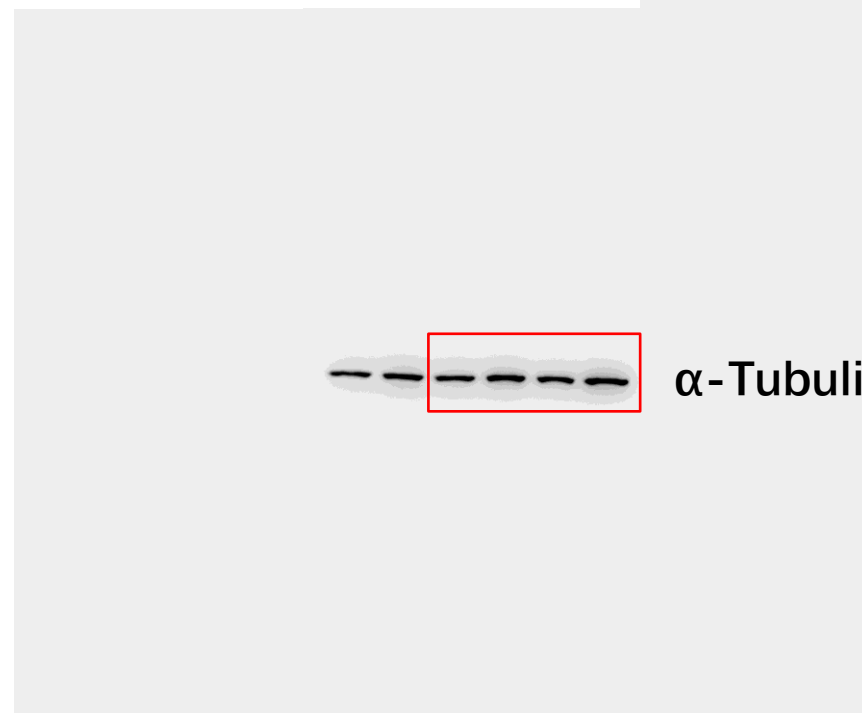

Supplement: fig2-data2 [file elife-100205-fig2-data2-v1.zip]

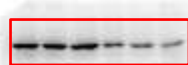

**UCP1**

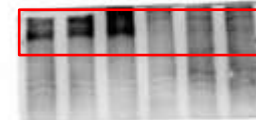

**ADGRA3**

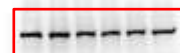

**HSP90**

Supplement: fig3-data2 [file elife-100205-fig3-data2-v1.zip]

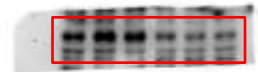

**UCP1**

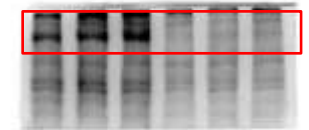

**ADGRA3**

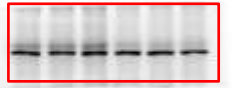

**HSP90**

Supplement: fig3-data2 [file elife-100205-fig3-data2-v1.zip]

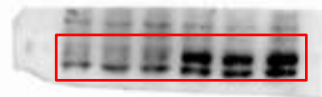

UCP1

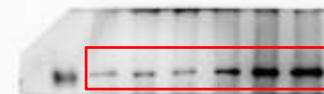

FLAG

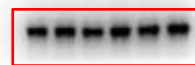

$\alpha$ -Tubulin

Supplement: fig4-data2 [file elife-100205-fig4-data2-v1.zip]

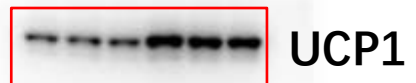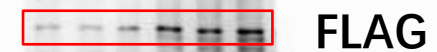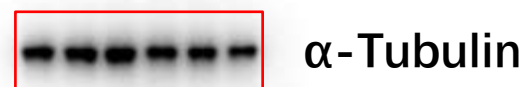

Supplement: fig4-data2 [file elife-100205-fig4-data2-v1.zip]

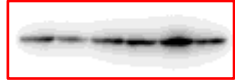

UCP1

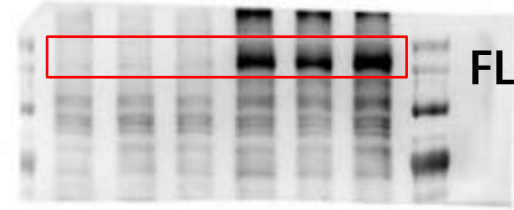

FLAG

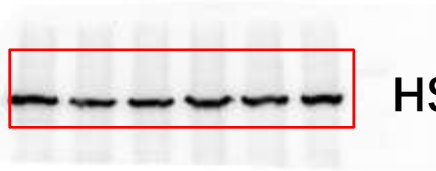

HSP90

Supplement: fig4-figsupp1-data2 [file elife-100205-fig4-figsupp1-data2-v1.zip]

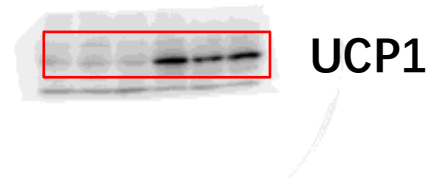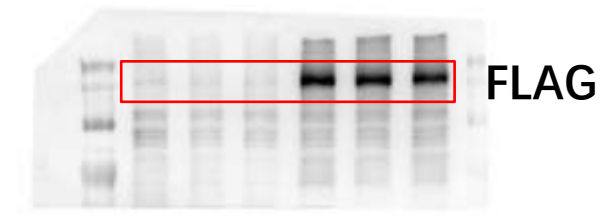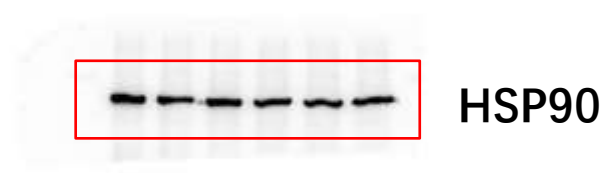

Supplement: fig4-figsupp1-data2 [file elife-100205-fig4-figsupp1-data2-v1.zip]

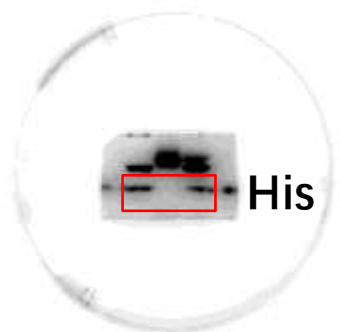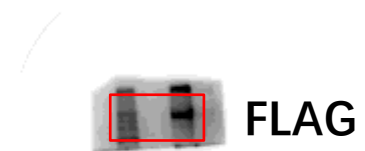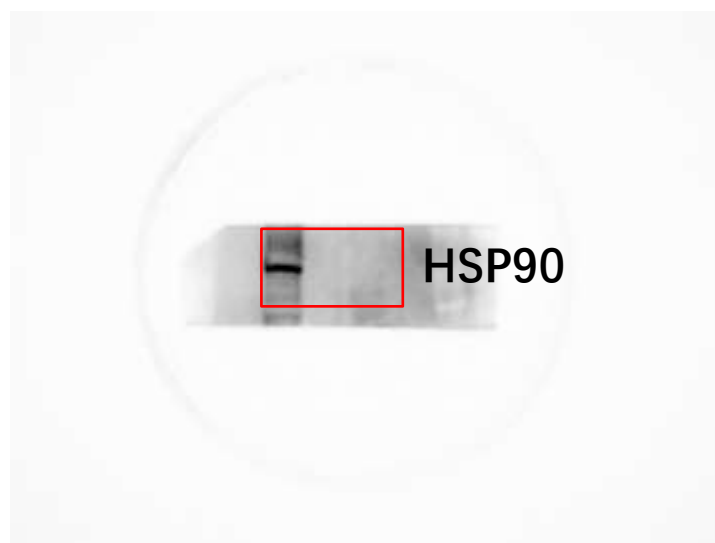

Supplement: fig5-data2 [file elife-100205-fig5-data2-v1.zip]

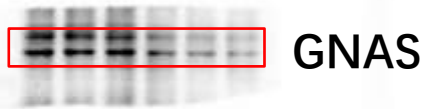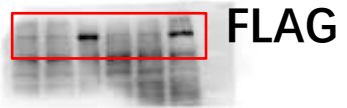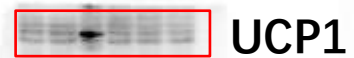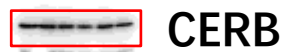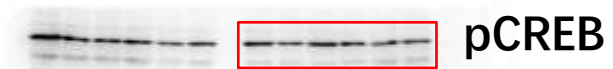

Supplement: fig5-data2 [file elife-100205-fig5-data2-v1.zip]

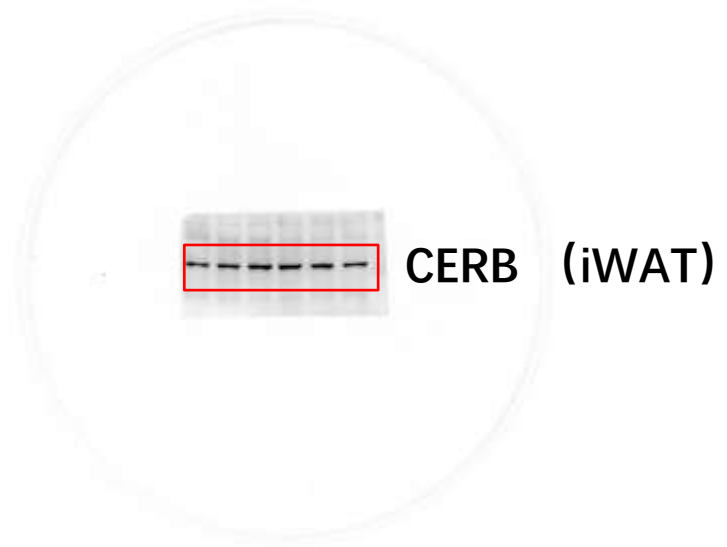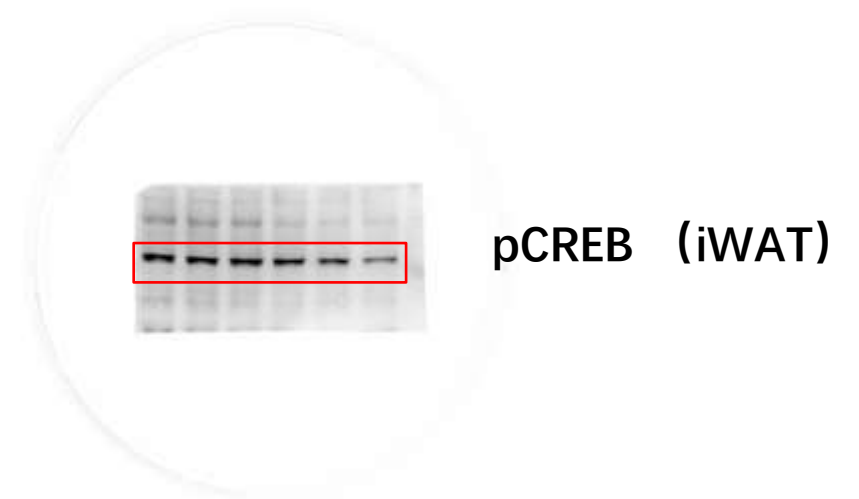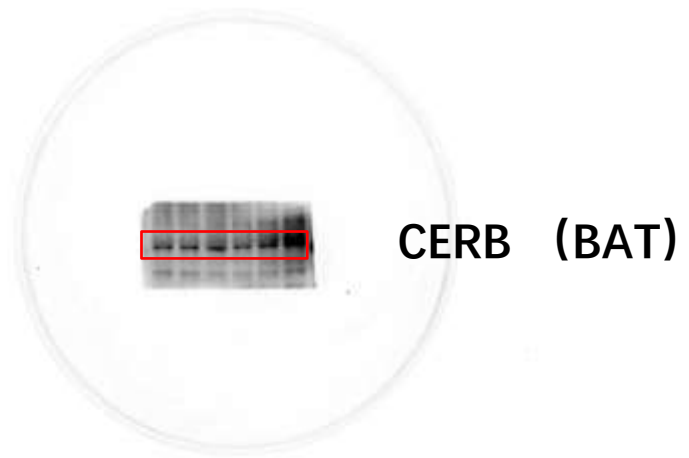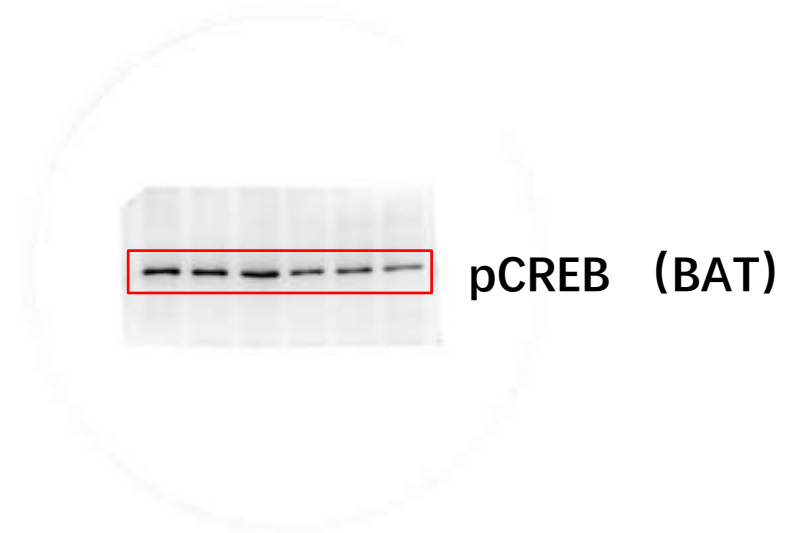

Supplement: fig5-data2 [file elife-100205-fig5-data2-v1.zip]

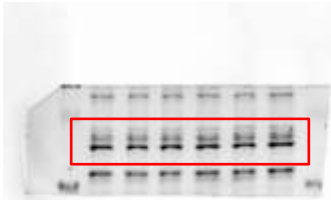

**CREB (iWAT)**

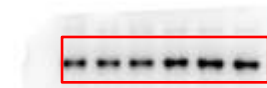

**p-CREB (iWAT)**

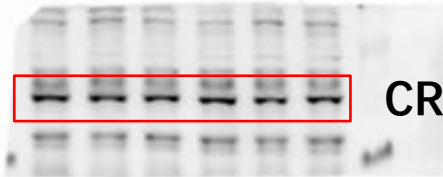

**CREB (BAT)**

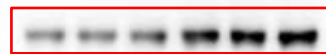

**p-CREB (BAT)**

Supplement: fig5-data2 [file elife-100205-fig5-data2-v1.zip]

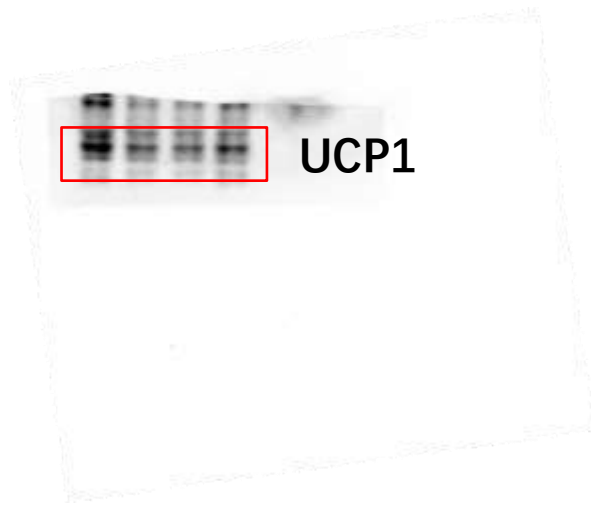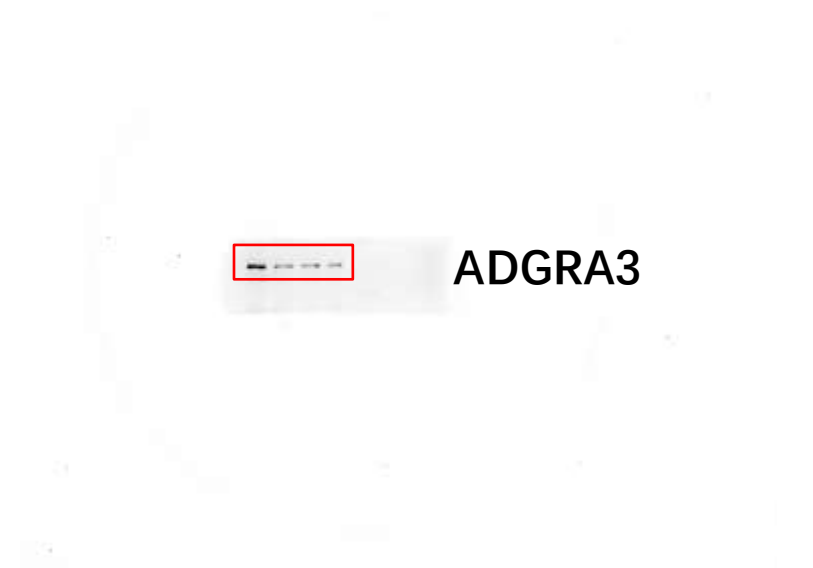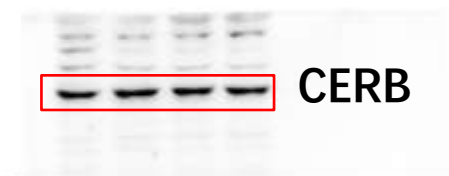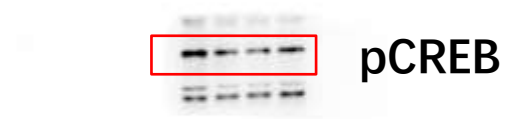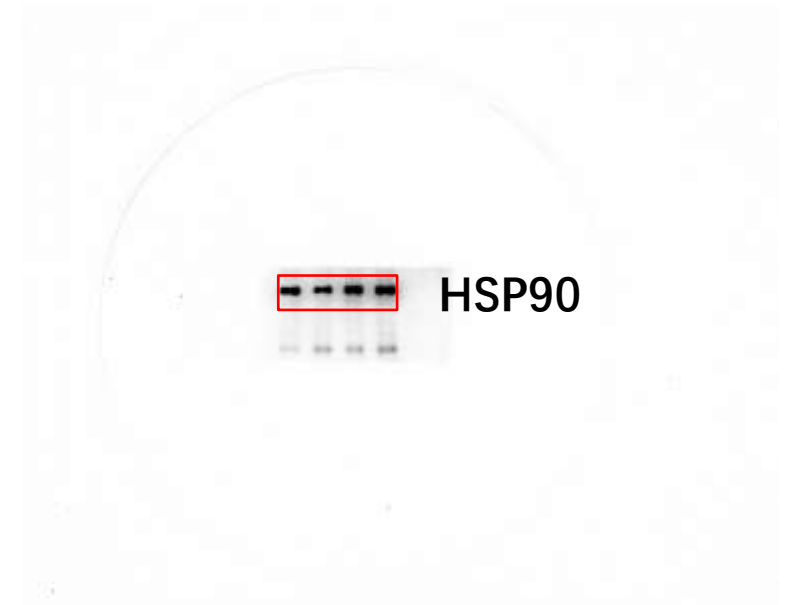

Supplement: fig5-data2 [file elife-100205-fig5-data2-v1.zip]

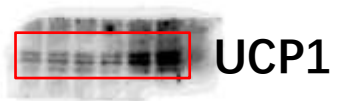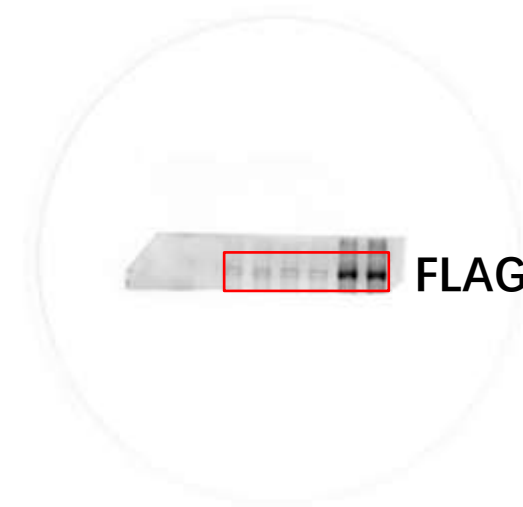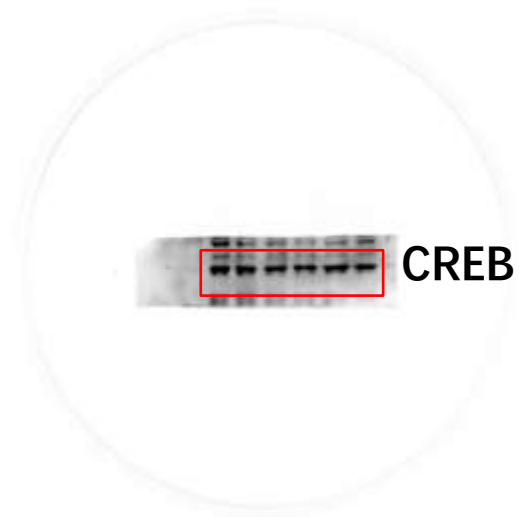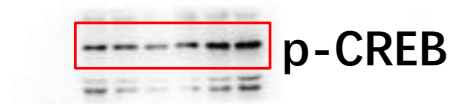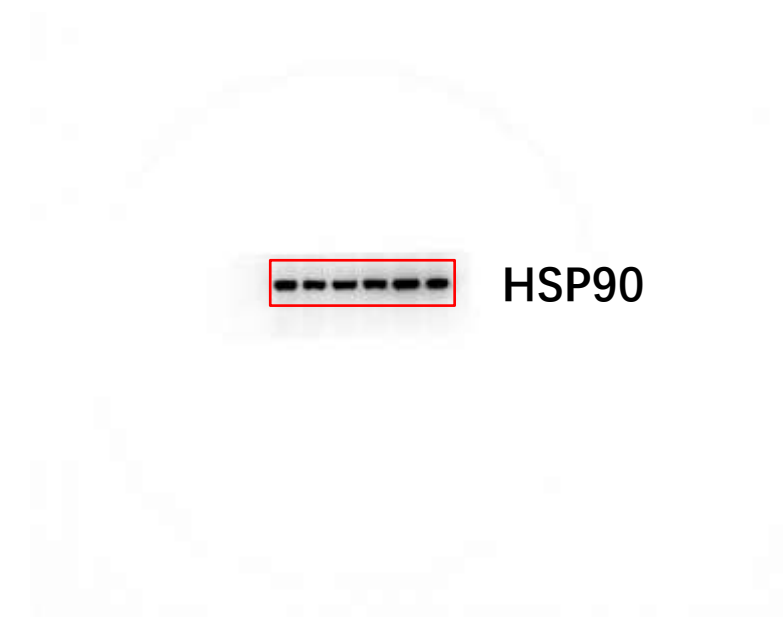

Supplement: fig5-data2 [file elife-100205-fig5-data2-v1.zip]

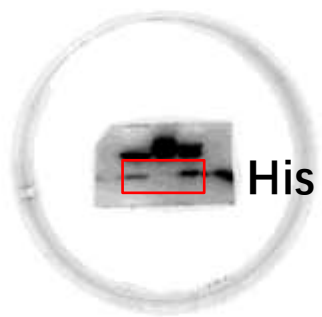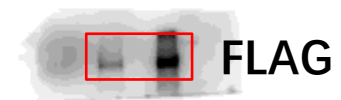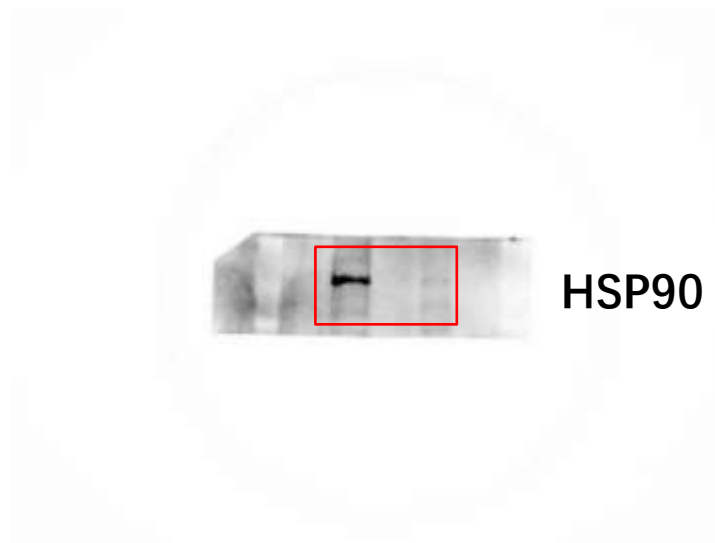

Supplement: fig5-data2 [file elife-100205-fig5-data2-v1.zip]

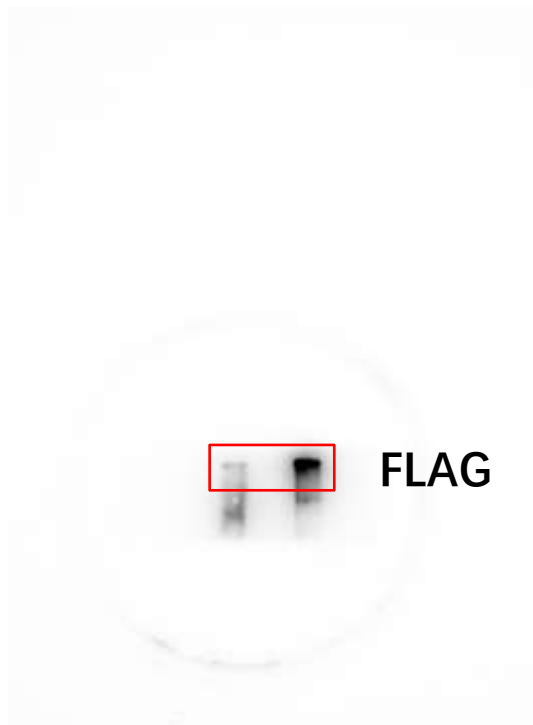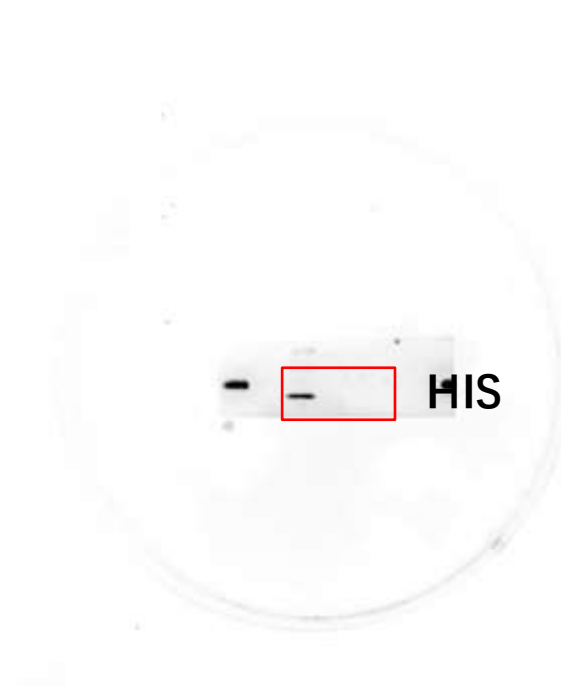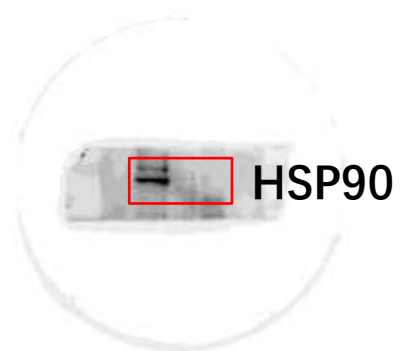

Supplement: fig5-figsupp1-data2 [file elife-100205-fig5-figsupp1-data2-v1.zip]



FLAG



HIS



HSP90

Supplement: fig5-figsupp1-data2 [file elife-100205-fig5-figsupp1-data2-v1.zip]



FLAG



HIS



HSP90

Supplement: fig5-figsupp1-data2 [file elife-100205-fig5-figsupp1-data2-v1.zip]

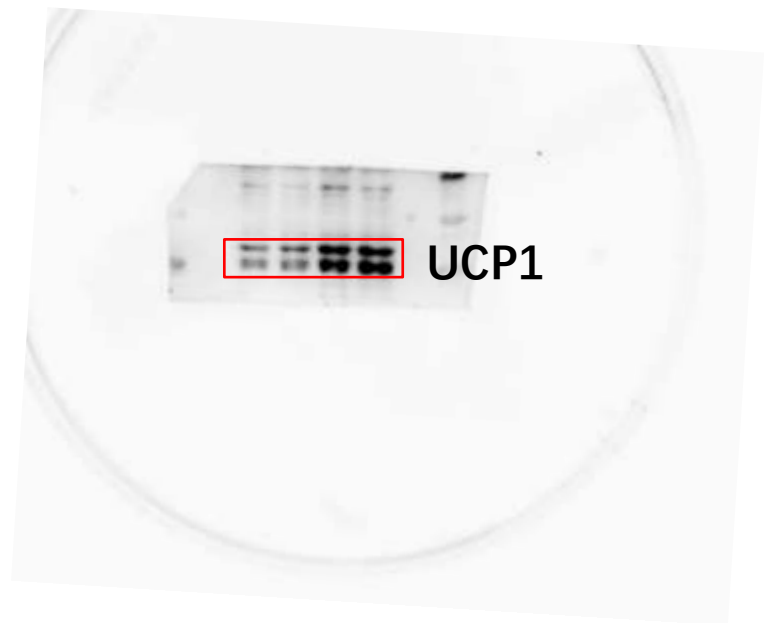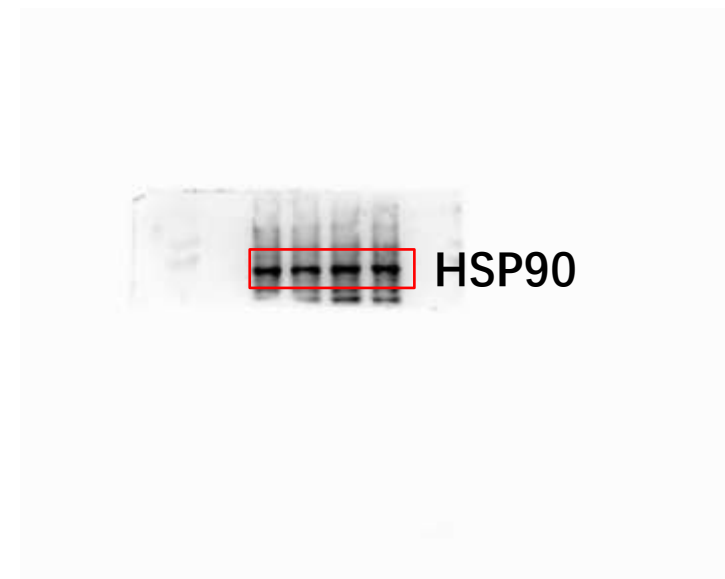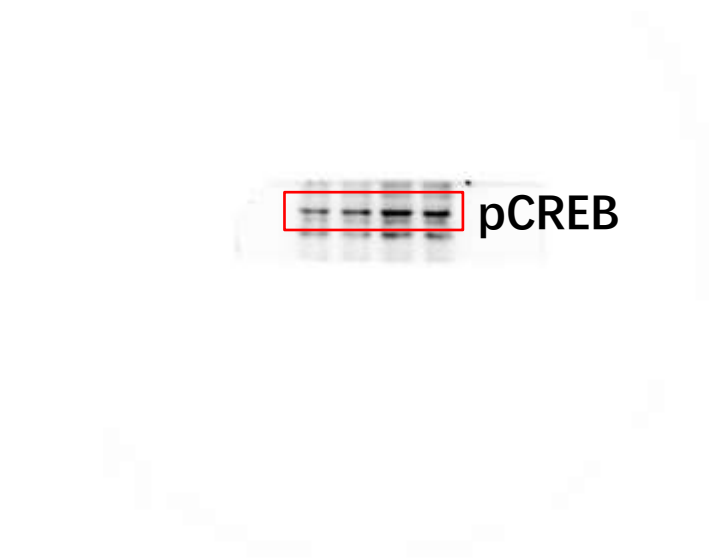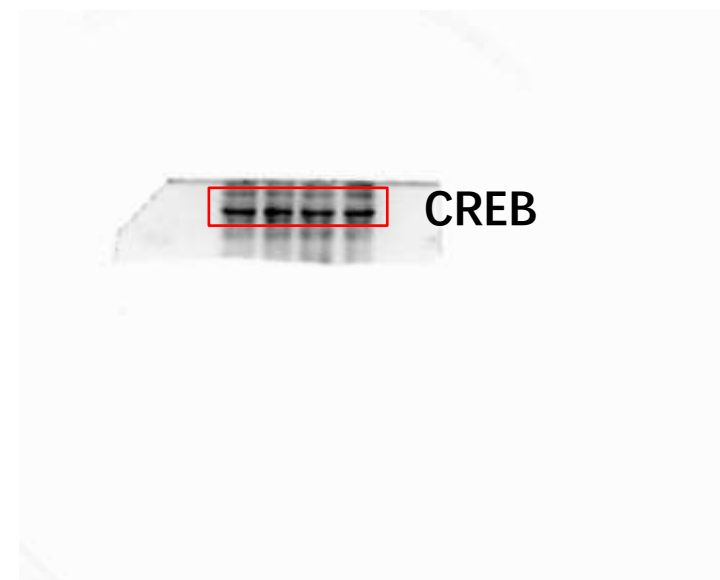

Supplement: fig6-data2 [file elife-100205-fig6-data2-v1.zip]

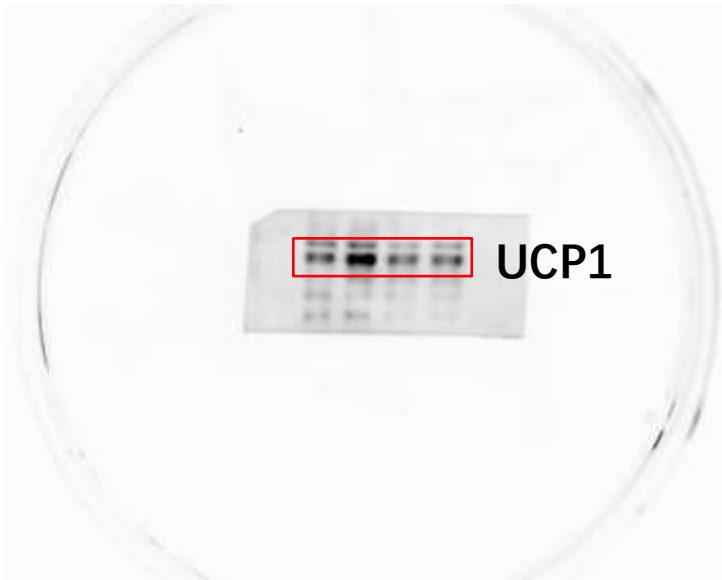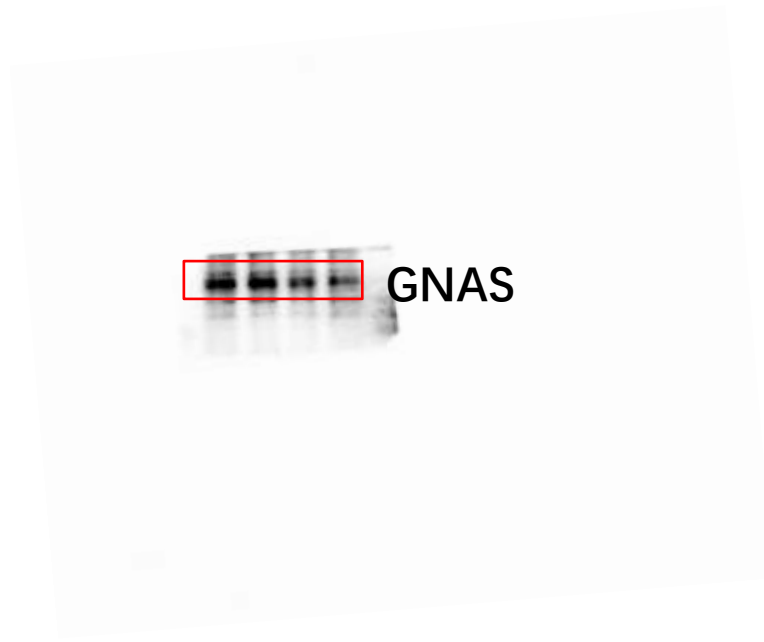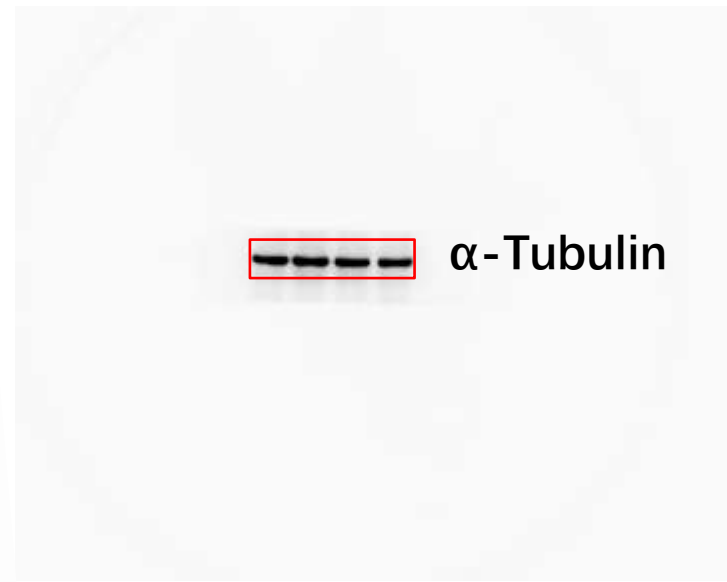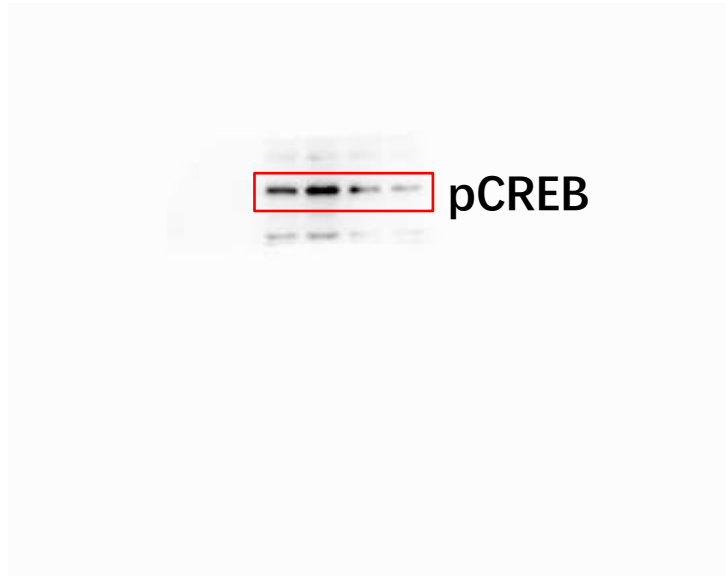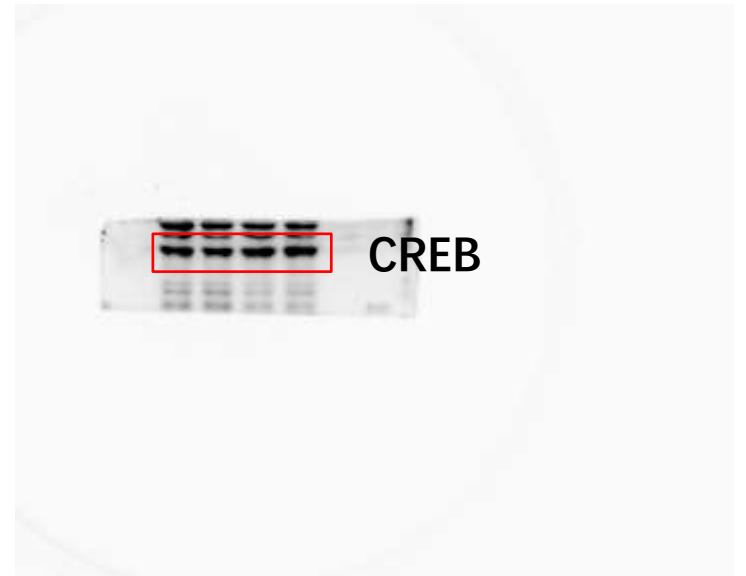

Supplement: fig6-data2 [file elife-100205-fig6-data2-v1.zip]

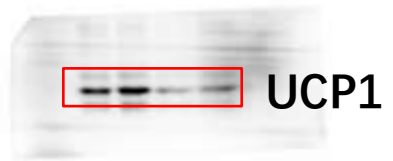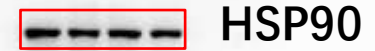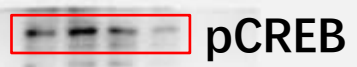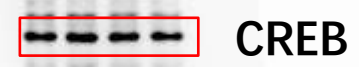

Supplement: fig6-data2 [file elife-100205-fig6-data2-v1.zip]

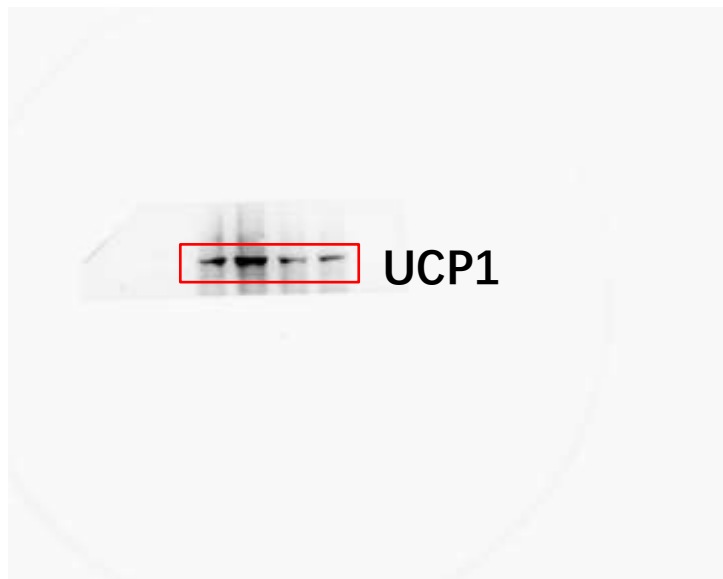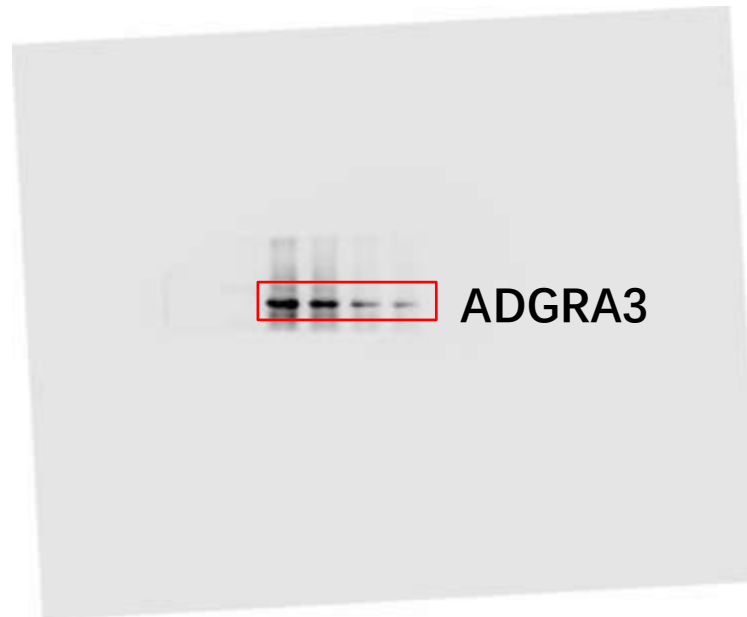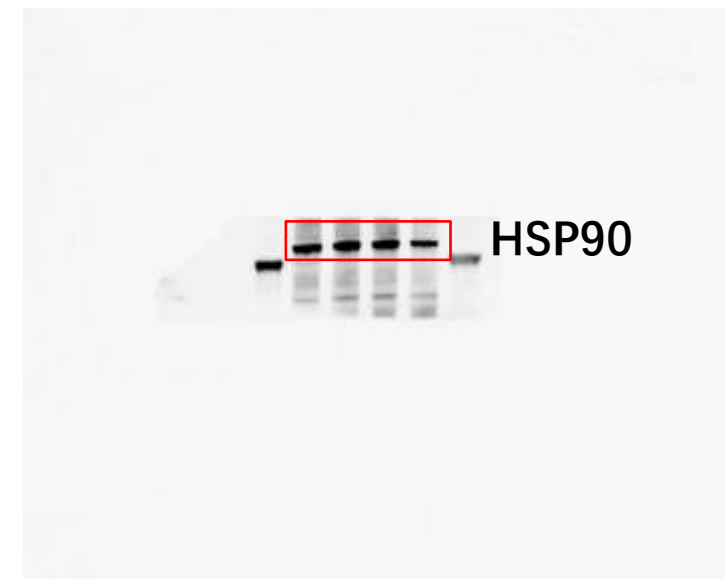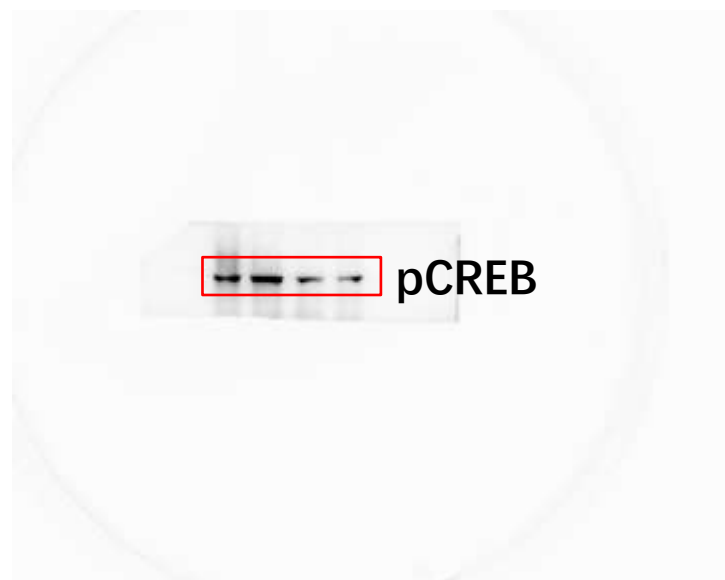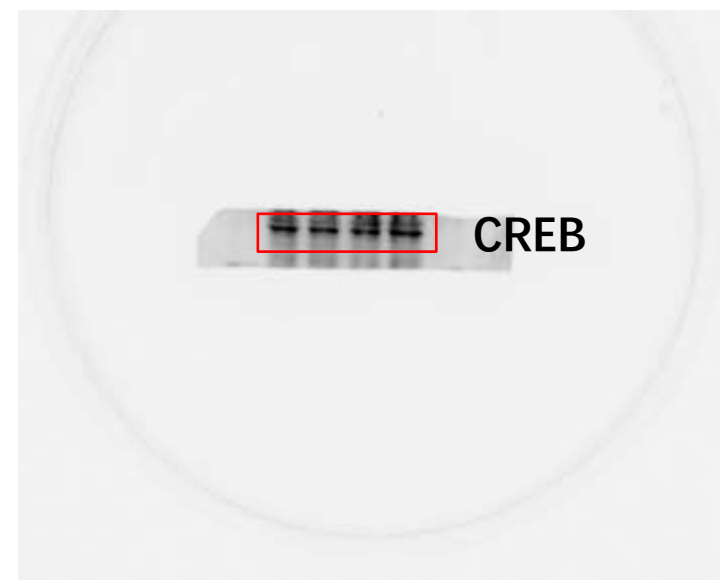

Supplement: fig6-data2 [file elife-100205-fig6-data2-v1.zip]
